# Supplementary material for: New pyrazolo[3,4- d ]pyrimidine derivatives as EGFR-TK inhibitors: design, green synthesis, potential anti-proliferative activity and P-glycoprotein inhibition
Source: Royal Society of Chemistry journal article supplement (doi:10.1039/d3ra05401b), 2024-01-01
Supplement: d3ra05401b1.pdf [file d3ra05401b1.pdf]

## 1. Chemistry

Using a Pye Unicam SP1200 spectrophotometer, IR-spectra were recorded using the KBr wafer method (Pye Unicam Ltd., Cambridge, UK). The  $^1\text{H}$ -NMR spectra were obtained on a Bruker Avance (III) with a Varian-Gemini 400 MHz and an internal standard of Tetramethyl silane (chemical shifts in scale ppm), while the  $^{13}\text{C}$ -NMR spectra were obtained at 100 MHz. TMS was used as an internal standard in deuterated Dimethyl sulfoxide ( $\text{DMSO-}d_6$ ).

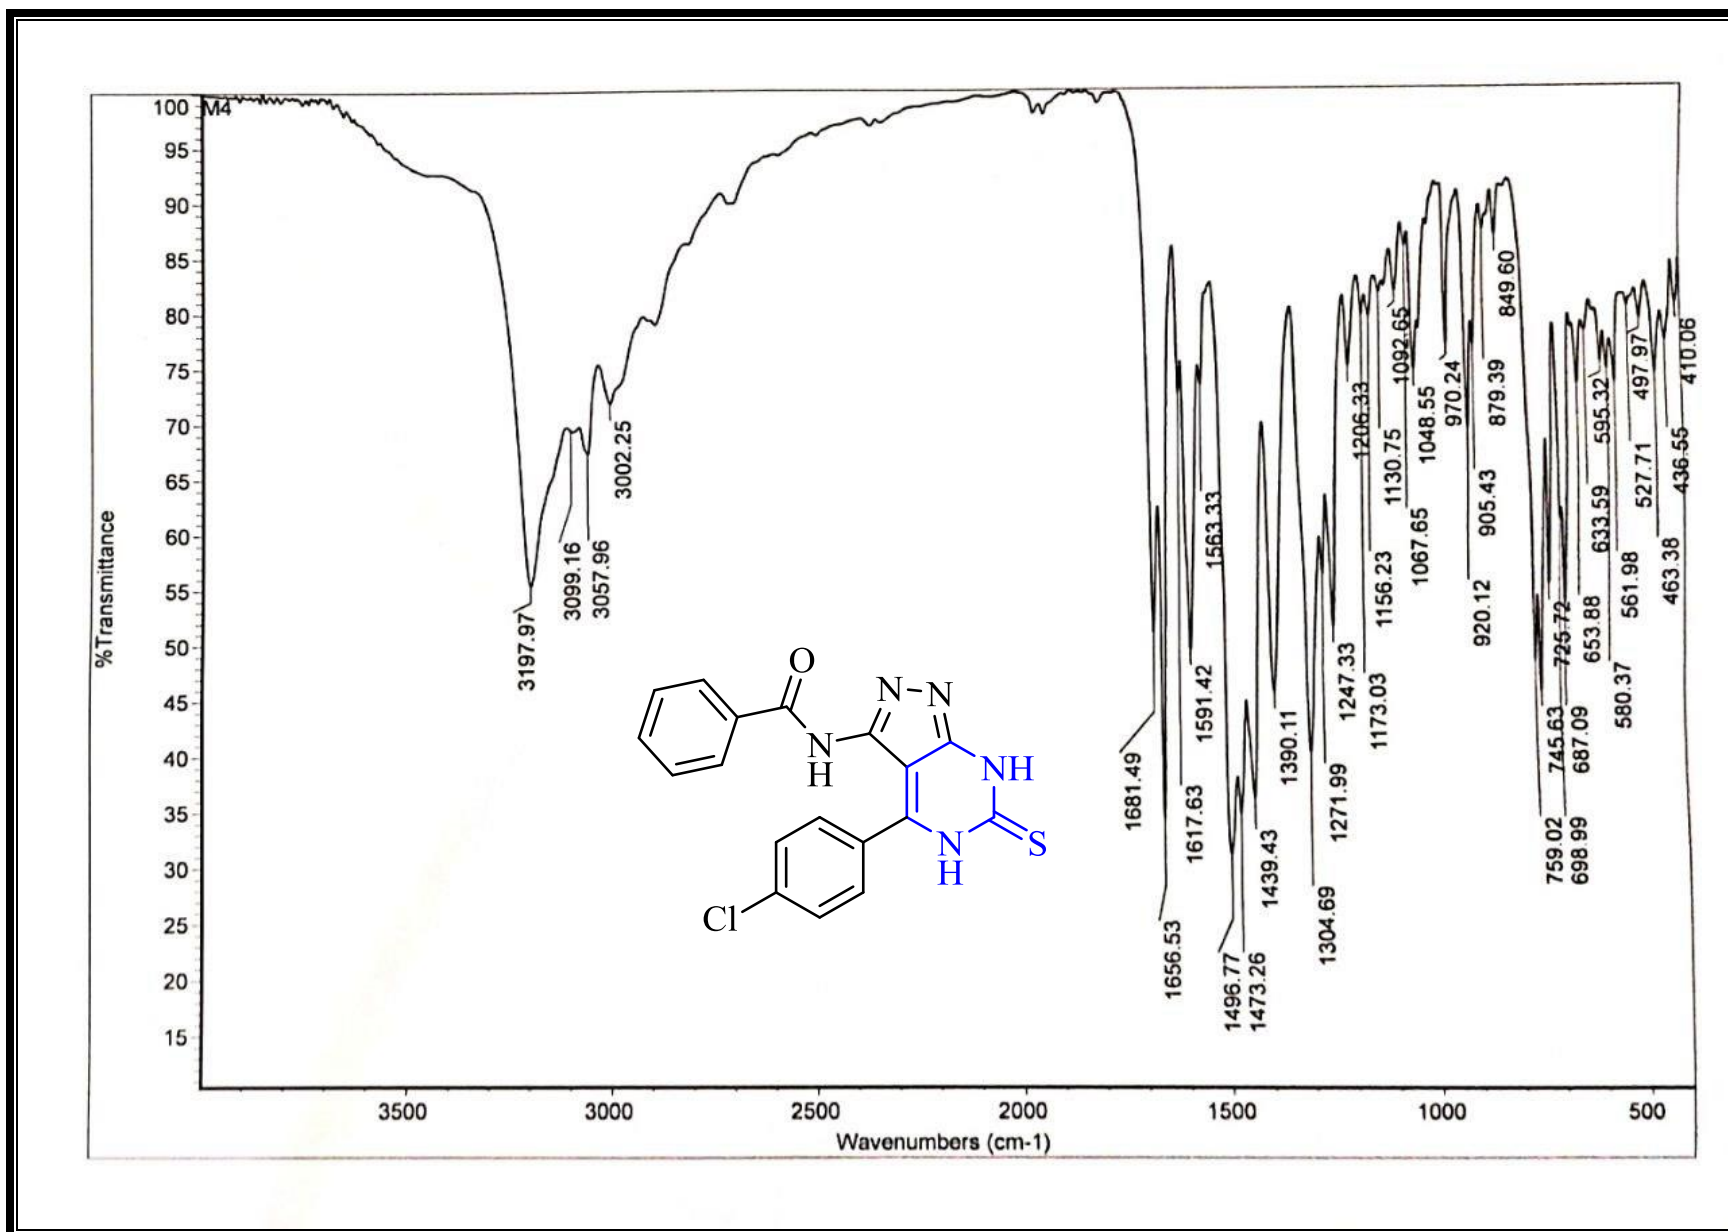

IR of *N*-(4-(4-chlorophenyl)-6-thioxo-6,7-dihydro-5H-pyrazolo[3,4-d]pyrimidin-3-yl)benzamide (2).

Paula Soliman\_H\_M4

Microanalytical Unit - FOPCU - NMR laboratory  
www.pharma.cu.edu.eg dir-mau.fopcu@pharma.cu.edu.eg

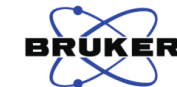

12.4080  
11.8513  
11.4613

8.0368  
8.0346  
7.6941  
7.6855  
6.7632  
6.7592  
6.7546  
6.7505

3.3482  
2.5087

Current Data Parameters  
NAME Paula Soliman\_H\_M4  
EXPNO 10  
PROCNO 1

F2 - Acquisition Parameters  
Date\_ 20210712  
Time 8.20  
INSTRUM spect  
PROBHD 5 mm PABBO BB/  
PULPROG zg30  
TD 65536  
SOLVENT DMSO  
NS 32  
DS 2  
SWH 8012.820 Hz  
FIDRES 0.122266 Hz  
AQ 4.0894465 sec  
RG 169.46  
DW 62.400 usec  
DE 6.50 usec  
TE 298.0 K  
D1 1.00000000 sec  
TD0 1

===== CHANNEL f1 =====  
SFO1 400.1924713 MHz  
NUC1 1H  
P1 15.00 usec  
PLW1 10.39999962 W

F2 - Processing parameters  
SI 65536  
SF 400.1900000 MHz  
WDW EM  
SSB 0  
LB 0.30 Hz  
GB 0  
PC 1.00

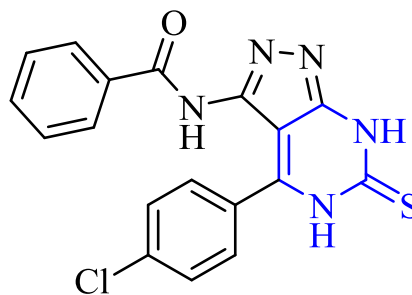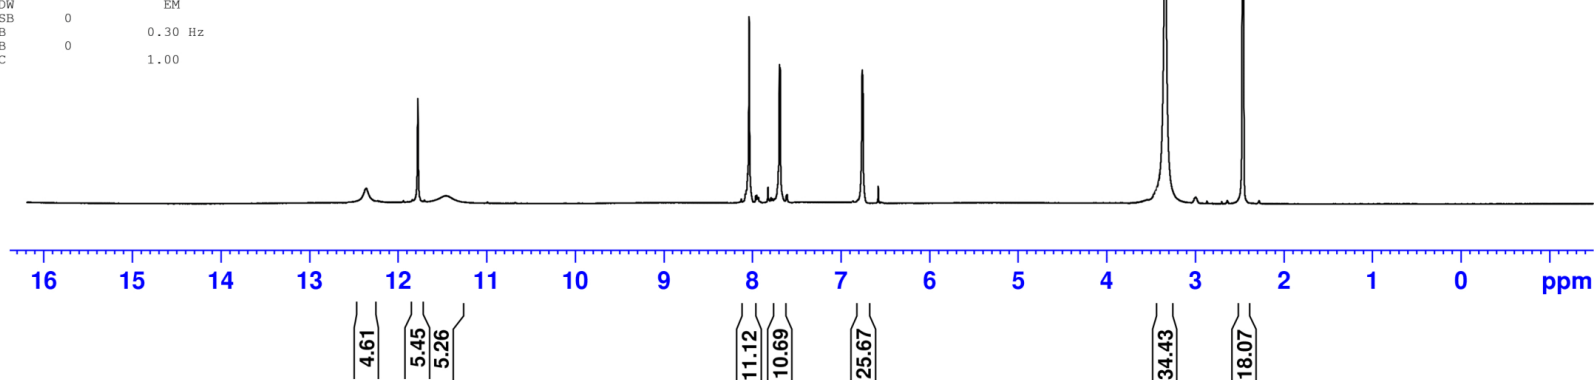

<sup>1</sup>H-NMR of *N*-(4-(4-chlorophenyl)-6-thioxo-6,7-dihydro-5H-pyrazolo[3,4-d]pyrimidin-3-yl)benzamide (2).

Paula Soliman\_H\_M4\_D2O

Microanalytical Unit - FOPCU - NMR laboratory  
www.pharma.cu.edu.eg dir-mau.fopcu@pharma.cu.edu.eg

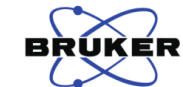

Current Data Parameters  
NAME Paula Soliman\_H\_M4\_D2O  
EXPNO 10  
PROCNO 1

F2 - Acquisition Parameters  
Date\_ 20210712  
Time 11.15  
INSTRUM spect  
PROBHD 5 mm PABBO BB/  
PULPROG zg30  
TD 65536  
SOLVENT DMSO  
NS 32  
DS 2  
SWH 8012.820 Hz  
FIDRES 0.122266 Hz  
AQ 4.0894465 sec  
RG 169.46  
DW 62.400 usec  
DE 6.50 usec  
TE 298.0 K  
D1 1.00000000 sec  
TD0 1

----- CHANNEL f1 -----  
SF01 400.1924713 MHz  
NUC1 1H  
P1 15.00 usec  
PLW1 10.39999962 W

F2 - Processing parameters  
SI 65536  
SF 400.1900000 MHz  
WDW EM  
SSB 0  
LB 0.30 Hz  
GB 0  
PC 1.00

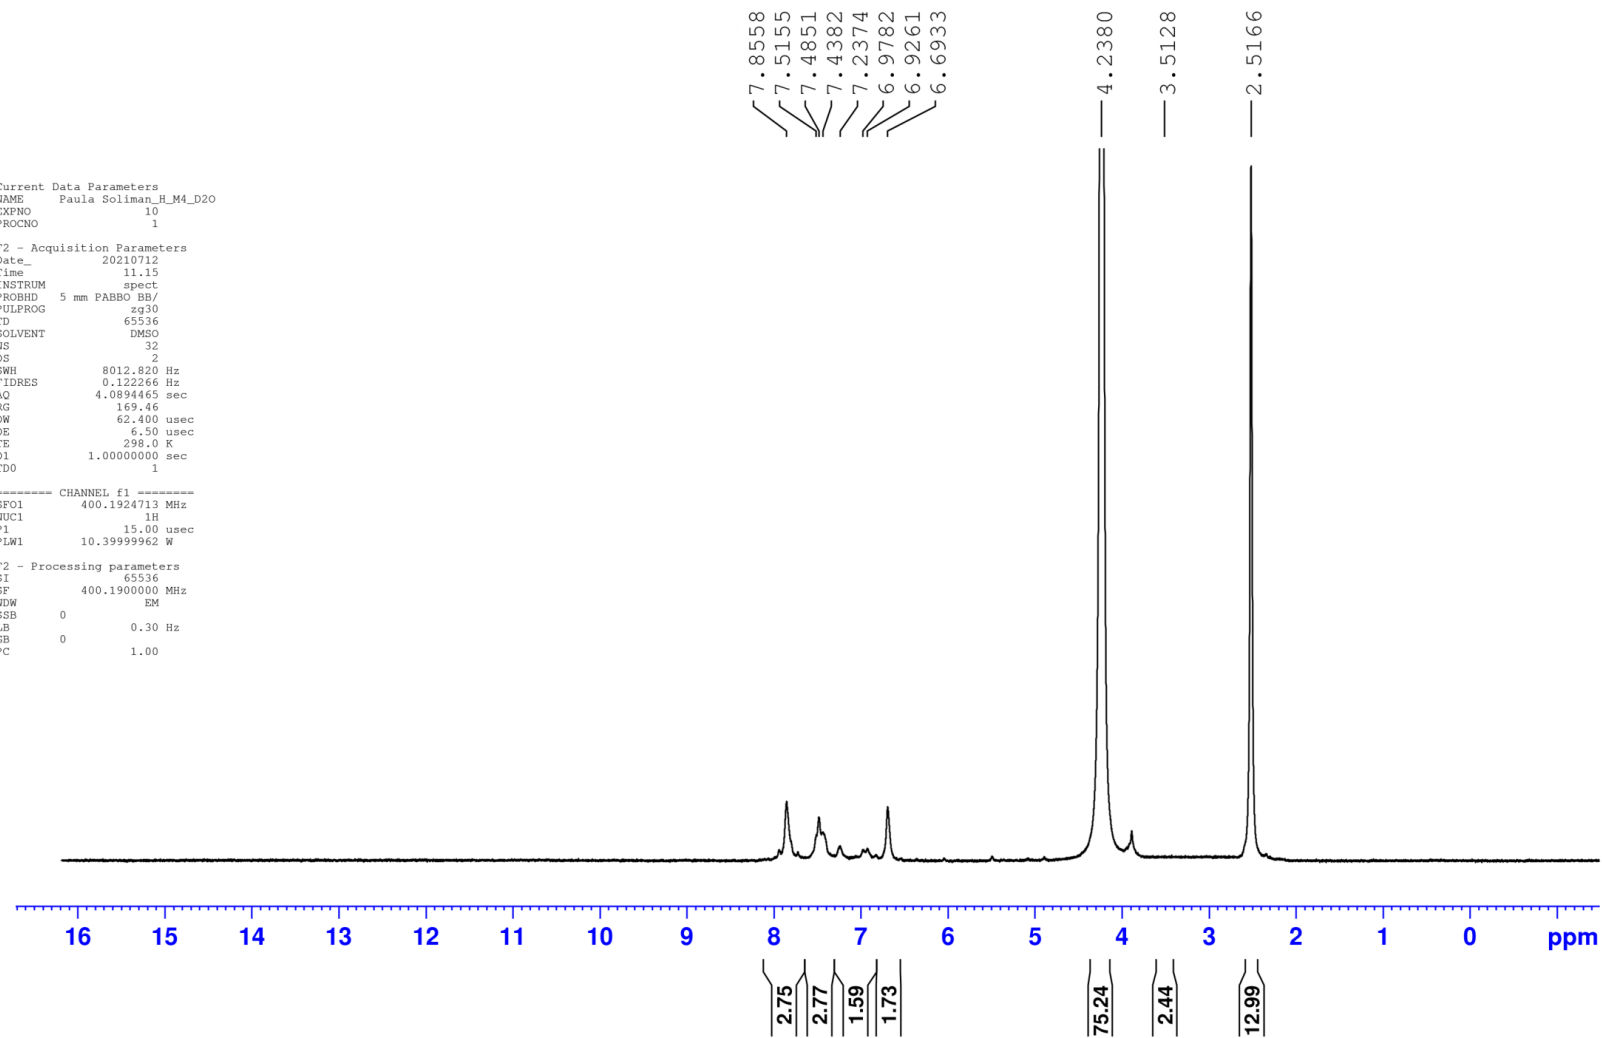

D<sub>2</sub>O of *N*-(4-(4-chlorophenyl)-6-thioxo-6,7-dihydro-5H-pyrazolo[3,4-d]pyrimidin-3-yl)benzamide (2).

Paula Soliman\_C\_M4

Microanalytical Unit - FOPCU - NMR laboratory  
www.pharma.cu.edu.eg dir-mau.fopcu@pharma.cu.edu.eg

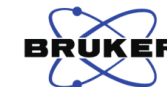

187.64  
173.70  
170.94  
159.63  
156.79  
156.08  
150.07  
148.01  
146.48  
145.94  
124.37  
117.58  
112.88  
90.19  
41.16  
40.61  
40.40  
40.19  
39.98  
39.78  
39.57  
39.36

Current Data Parameters  
NAME Paula Soliman\_C\_M4  
EXPNO 10  
PROCNO 1

F2 - Acquisition Parameters  
Date\_ 20210712  
Time 9.30  
INSTRUM spect  
PROBHD 5 mm PABBO BB/  
PULPROG zgpg30  
TD 65536  
SOLVENT DMSO  
NS 1200  
DS 4  
SWH 24038.461 Hz  
FIDRES 0.366798 Hz  
AQ 1.3631488 sec  
RG 202.37  
DW 20.800 usec  
DE 6.50 usec  
TE 298.0 K  
D1 2.00000000 sec  
D11 0.03000000 sec  
TD0 1

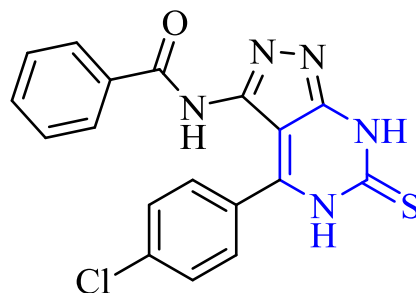

==== CHANNEL f1 =====  
SFO1 100.6379178 MHz  
NUC1 13C  
P1 10.00 usec  
PLW1 45.00000000 W  
  
==== CHANNEL f2 =====  
SFO2 400.1916008 MHz  
NUC2 1H  
CPDPRG[2] waltz16

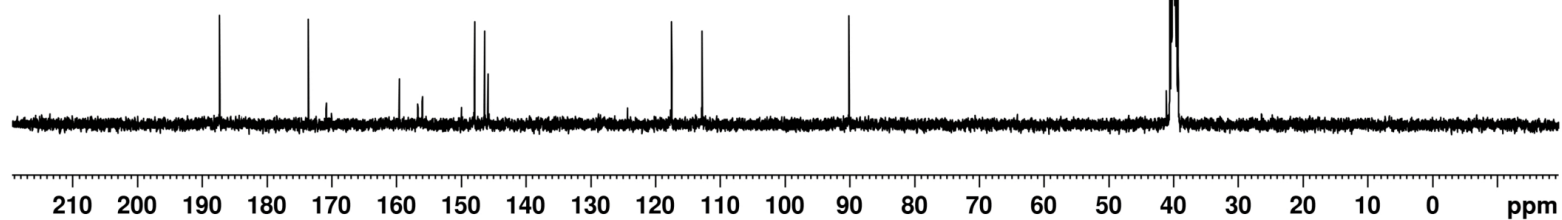

<sup>13</sup>C-NMR of *N*-(4-(4-chlorophenyl)-6-thioxo-6,7-dihydro-5H-pyrazolo[3,4-d]pyrimidin-3-yl)benzamide (2).

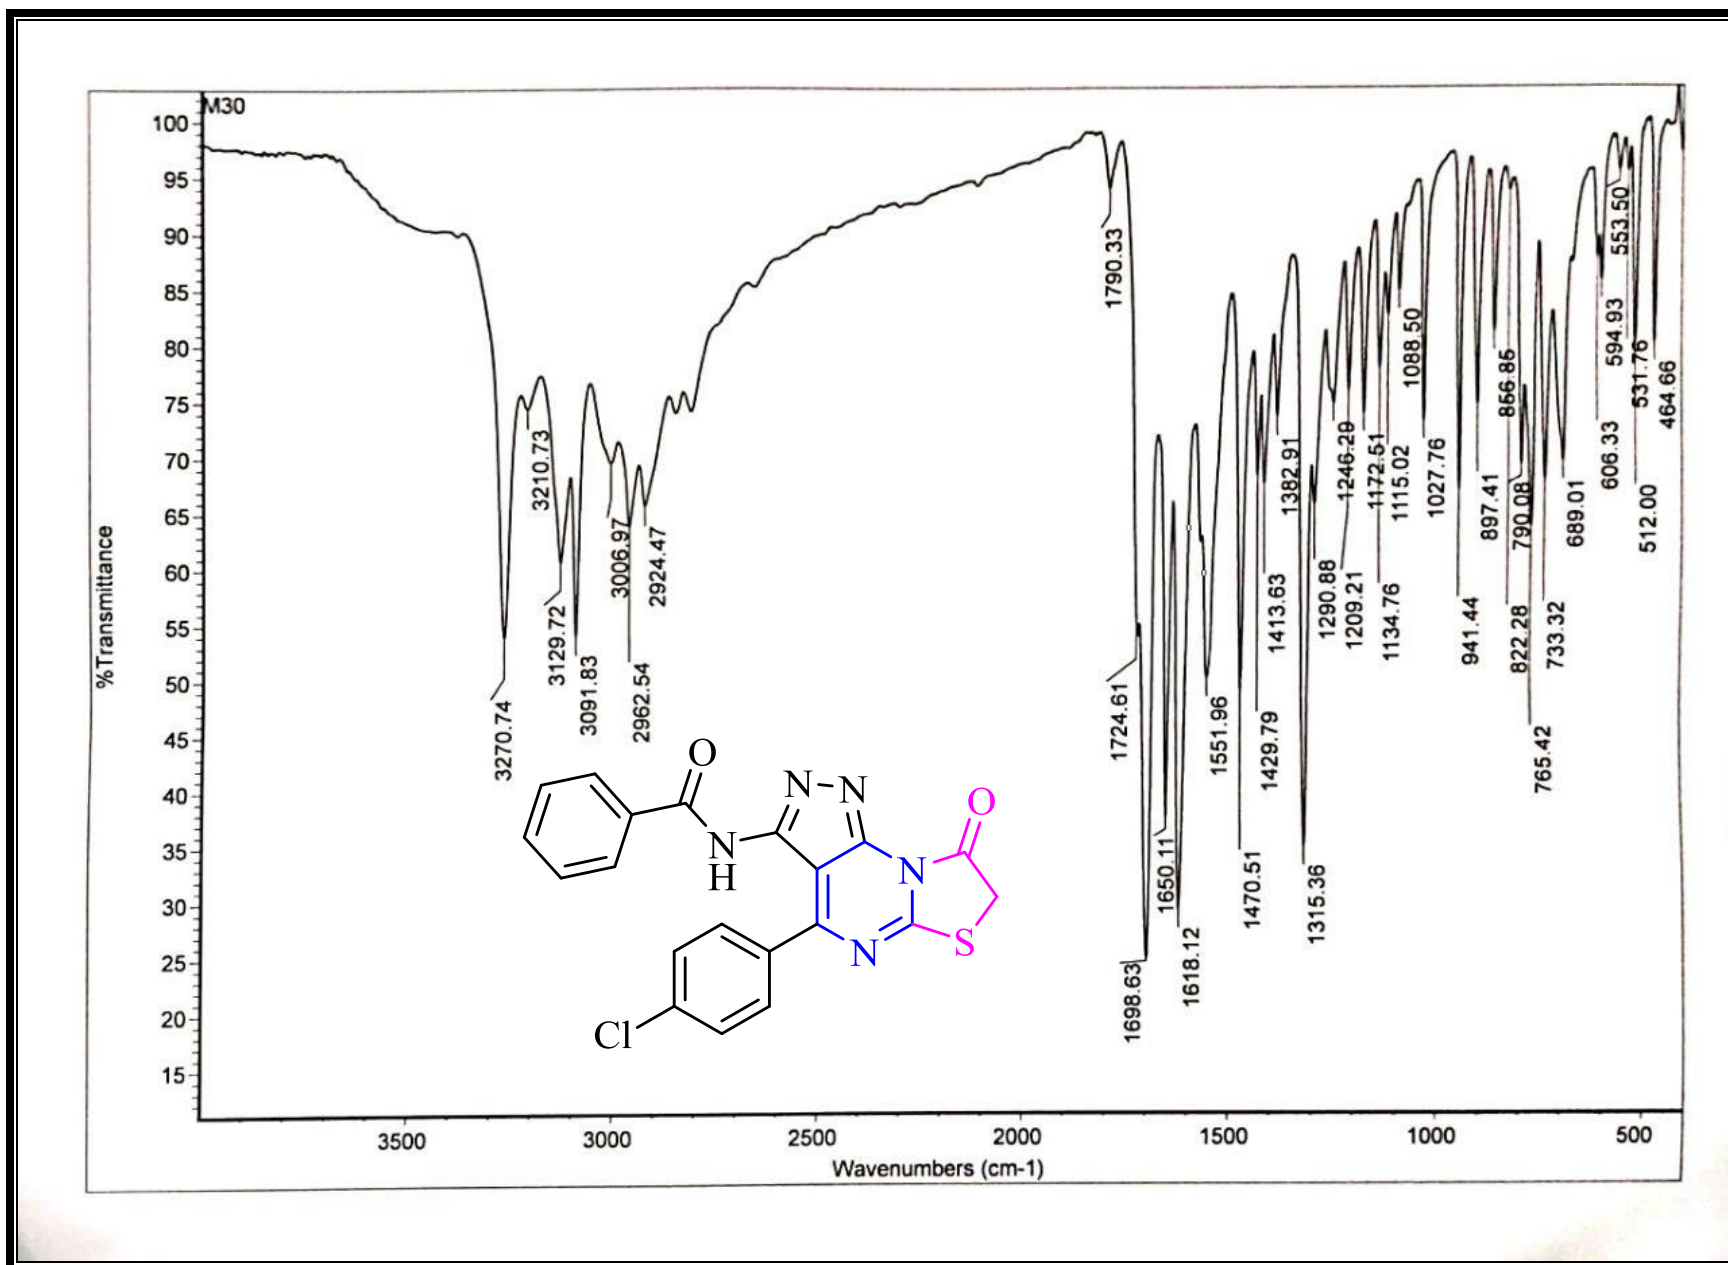

IR of *N*-(4-(4-chlorophenyl)-8-oxo-7,8-dihydropyrazolo[4,3-*e*]thiazolo[3,2-*a*]pyrimidin-3-yl)benzamide (3).

Paula Soliman\_H\_M30

Microanalytical Unit - FOPCU - NMR laboratory  
www.pharma.cu.edu.eg dir-mau.fopcu@pharma.cu.edu.eg

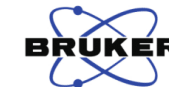

12.9243  
12.9154

8.0315  
8.0280  
8.0119  
8.0082  
7.9571  
7.6376  
7.4011  
7.3948  
7.3788  
7.3729  
7.1948  
7.1540  
7.1353  
7.1147  
6.7132  
6.6949  
6.6935  
6.6771  
4.0455  
3.9469  
3.3868  
2.5113

Current Data Parameters  
NAME Paula Soliman\_H\_M30  
EXPNO 10  
PROCNO 1

F2 - Acquisition Parameters  
Date\_ 20210711  
Time\_ 9.37  
INSTRUM spect  
PROBHD 5 mm PABBO BB/  
PULPROG zg30  
TD 65536  
SOLVENT DMSO  
NS 32  
DS 2  
SWH 8012.820 Hz  
FIDRES 0.122266 Hz  
AQ 4.0894465 sec  
RG 114.95  
DW 62.400 usec  
DE 6.50 usec  
TE 298.0 K  
D1 1.0000000 sec  
TD0 1

===== CHANNEL f1 =====  
SFO1 400.1924713 MHz  
NUC1 1H  
P1 15.00 usec  
PLW1 10.39999962 W

F2 - Processing parameters  
SI 65536  
SF 400.1900000 MHz  
WDW EM  
SSB 0  
LB 0.30 Hz  
GB 0  
PC 1.00

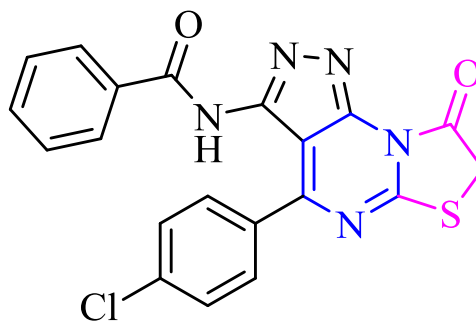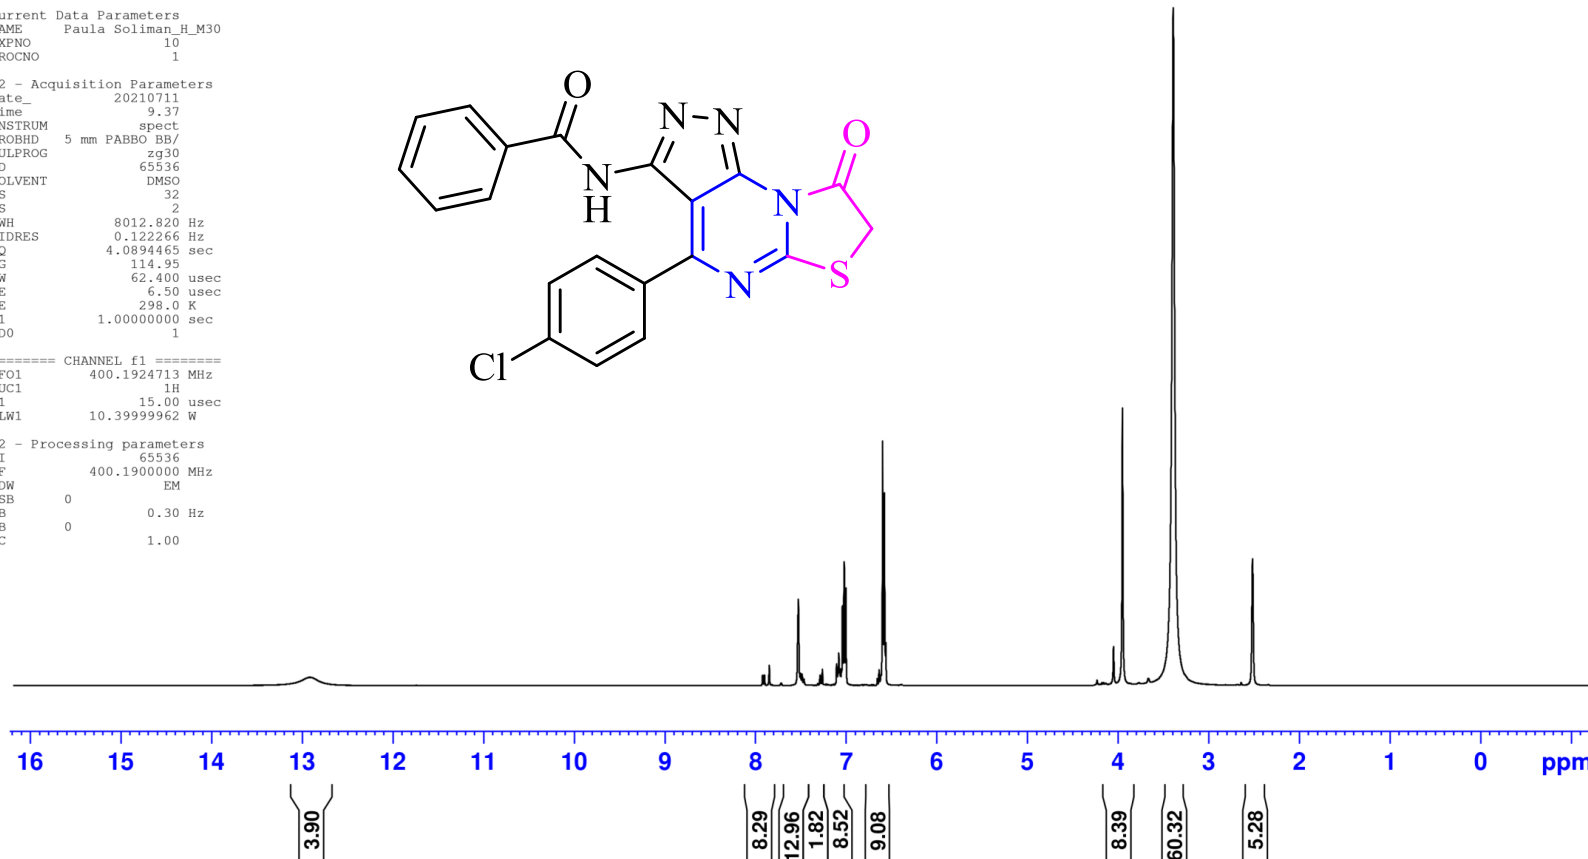

**<sup>1</sup>H-NMR of *N*-(4-(4-chlorophenyl)-8-oxo-7,8-dihydropyrazolo[4,3-*e*]thiazolo[3,2-*a*]pyrimidin-3-yl)benzamide (3).**

Paula Soliman\_H\_M30\_D2O

Microanalytical Unit - FOPCU - NMR laboratory  
www.pharma.cu.edu.eg dir-mau.fopcu@pharma.cu.edu.eg

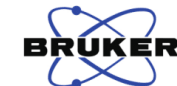

Current Data Parameters  
NAME Paula Soliman\_H\_M30\_D2O  
EXPNO 10  
PROCNO 1

F2 - Acquisition Parameters  
Date\_ 20210711  
Time 12.01  
INSTRUM spect  
PROBHD 5 mm PABBO BB/  
PULPROG zg30  
TD 65536  
SOLVENT DMSO  
NS 32  
DS 2  
SWH 8012.820 Hz  
FIDRES 0.122266 Hz  
AQ 4.0894465 sec  
RG 129.43  
DW 62.400 usec  
DE 6.50 usec  
TE 298.0 K  
D1 1.00000000 sec  
TDO 1

----- CHANNEL f1 -----  
SFO1 400.1924713 MHz  
NUC1 1H  
P1 15.00 usec  
PLW1 10.39999962 W

F2 - Processing parameters  
SI 65536  
SF 400.1900000 MHz  
WDW EM  
SSB 0  
LB 0.30 Hz  
GB 0  
PC 1.00

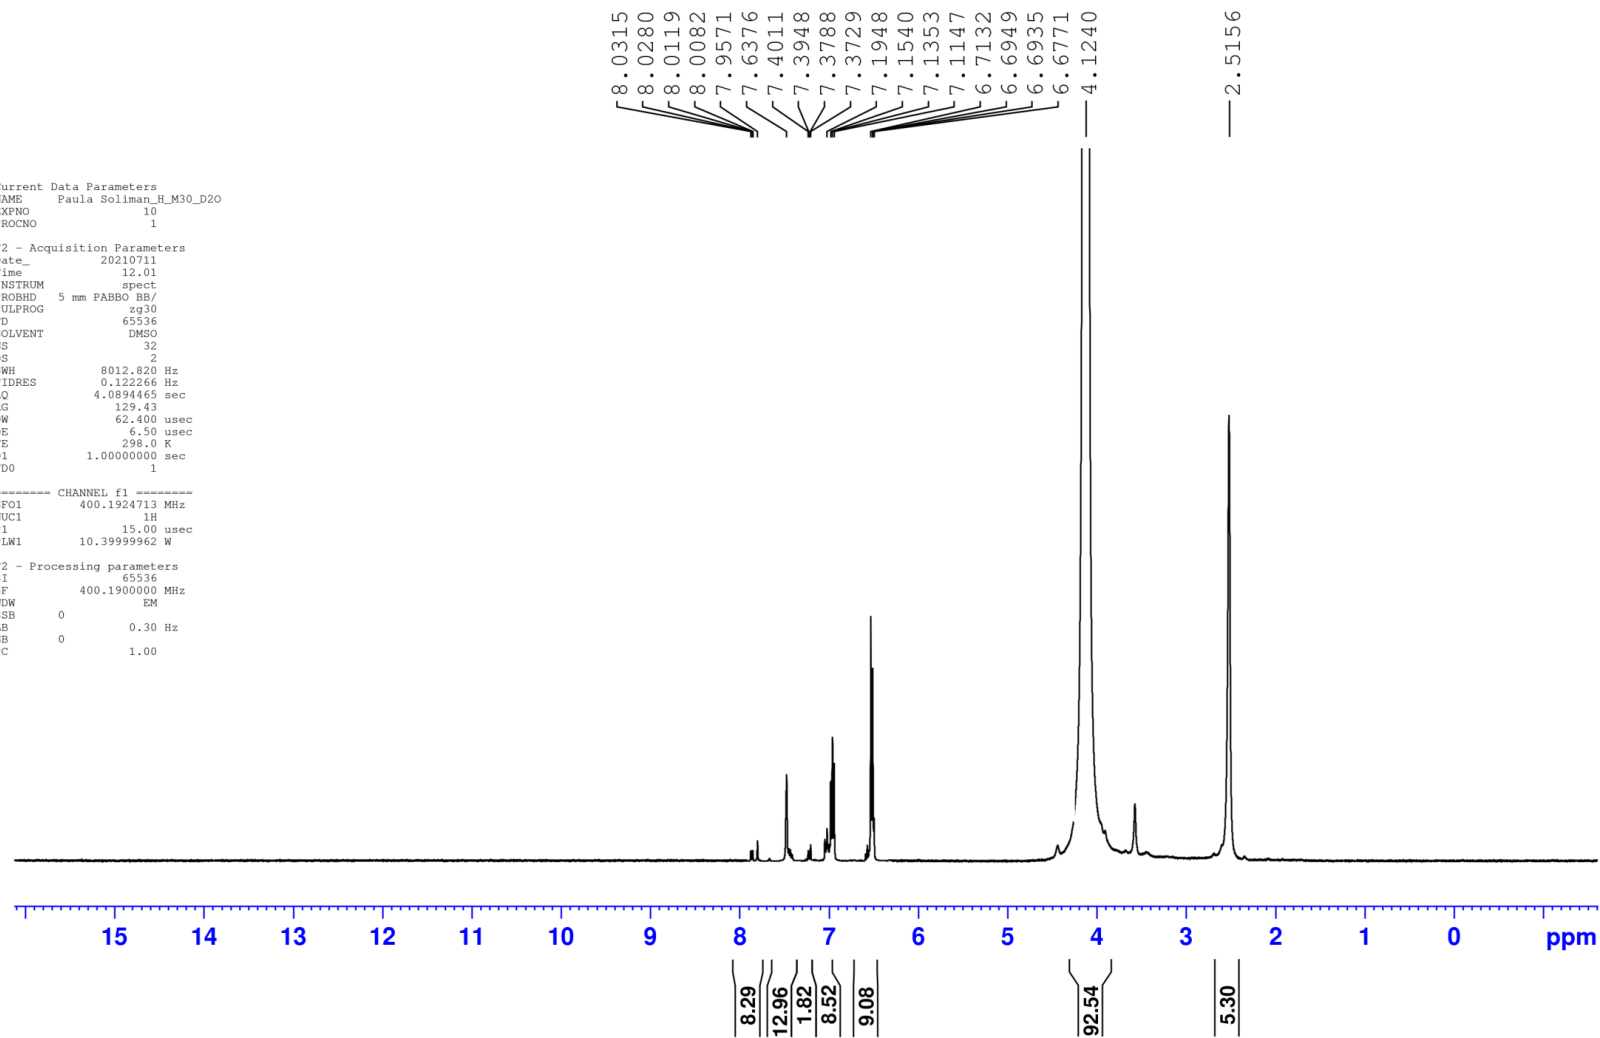

D<sub>2</sub>O of *N*-(4-(4-chlorophenyl)-8-oxo-7,8-dihydropyrazolo[4,3-*e*]thiazolo[3,2-*a*]pyrimidin-3-yl)benzamide (3).



Paula Soliman\_C\_M30

Microanalytical Unit - FOPCU - NMR laboratory  
www.pharma.cu.edu.eg dir-mau.fopcu@pharma.cu.edu.eg

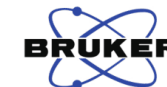

169.66  
168.85  
166.93  
159.51  
158.87  
152.45  
140.38  
134.43  
131.66  
129.98  
128.56  
126.08  
123.69  
123.33  
120.44  
117.41  
116.04

40.59  
40.38  
40.17  
39.96  
39.75  
39.55  
39.34  
22.83

Current Data Parameters  
NAME Paula Soliman\_C\_M30  
EXPNO 10  
PROCNO 1

F2 - Acquisition Parameters  
Date\_ 20210711  
Time 10.42  
INSTRUM spect  
PROBHD 5 mm PABBO BB/  
PULPROG zgpg30  
TD 65536  
SOLVENT DMSO  
NS 1500  
DS 4  
SWH 24038.461 Hz  
FIDRES 0.366798 Hz  
AQ 1.3631488 sec  
RG 202.37  
DW 20.800 usec  
DE 6.50 usec  
TE 298.0 K  
D1 2.00000000 sec  
D11 0.03000000 sec  
TD0 1

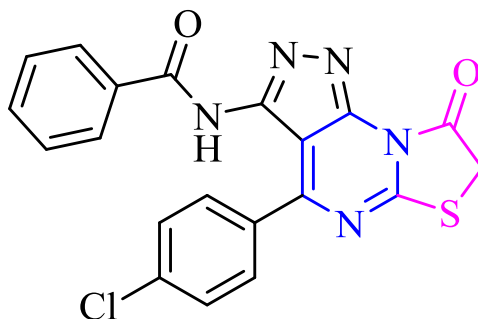

==== CHANNEL f1 =====  
SFO1 100.6379178 MHz  
NUC1 13C  
P1 10.00 usec  
PLW1 45.00000000 W  
  
==== CHANNEL f2 =====  
SFO2 400.1916008 MHz  
NUC2 1H  
CPDPRG2 waltz16

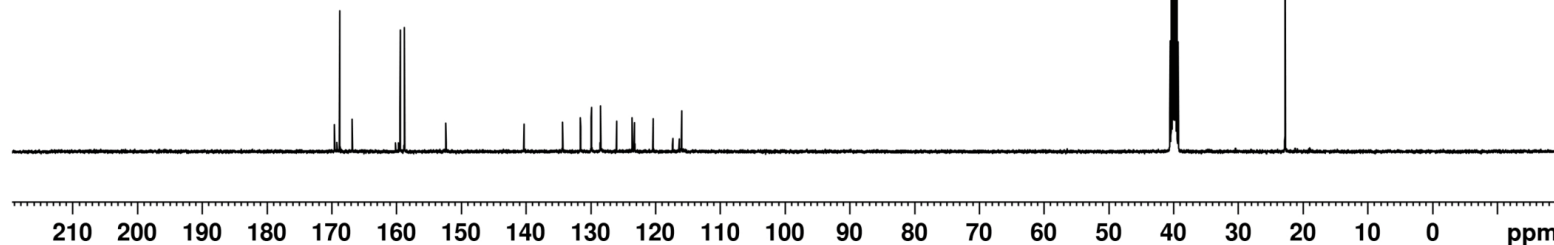

<sup>13</sup>C-NMR of *N*-(4-(4-chlorophenyl)-8-oxo-7,8-dihydropyrazolo[4,3-*e*]thiazolo[3,2-*a*]pyrimidin-3-yl)benzamide (3).

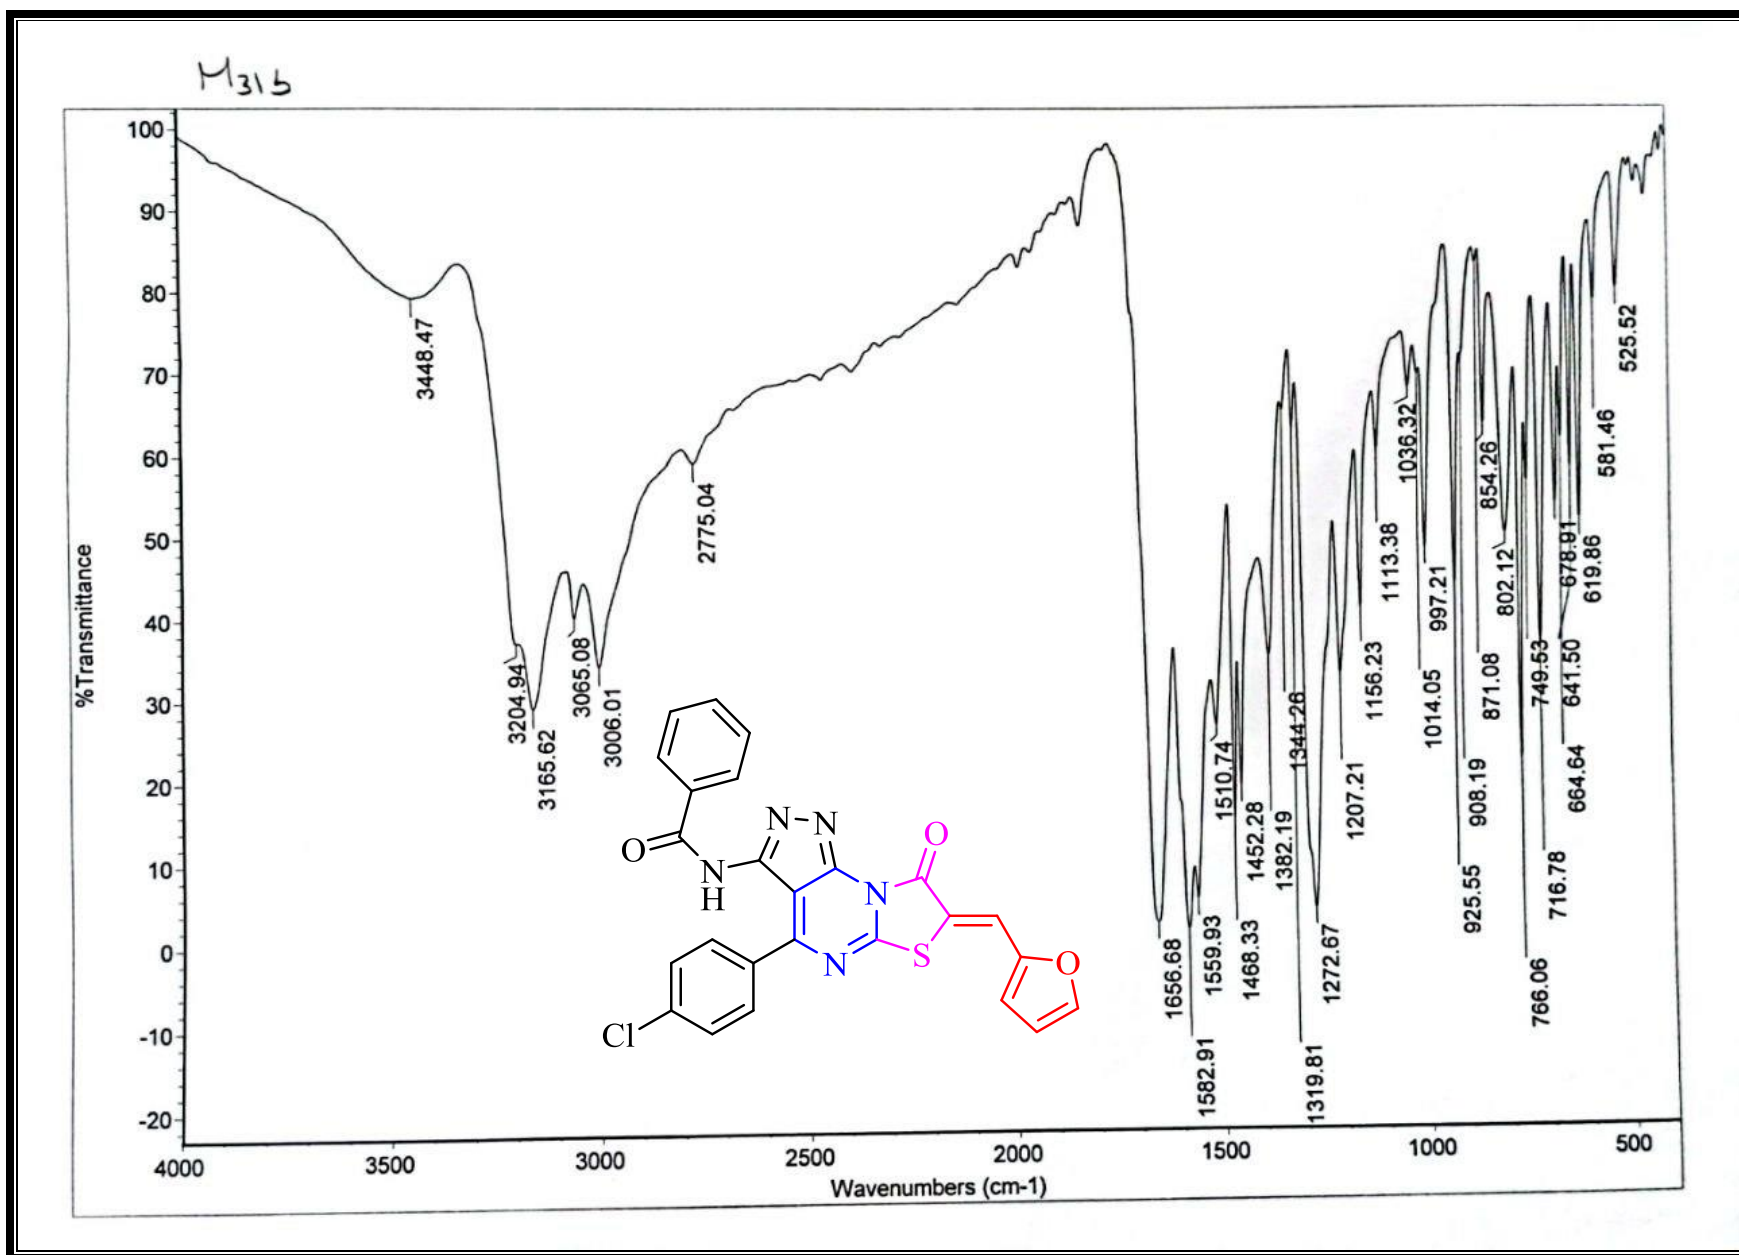

IR of *(E,Z)*-*N*-(4-(4-chlorophenyl)-7-(furan-2-ylmethylene)-8-oxo-7,8-dihydropyrazolo[4,3-*e*]thiazolo[3,2-*a*]pyrimidin-3-yl)benzamide (4).

Paula Soliman\_H\_M31A

Microanalytical Unit - FOPCU - NMR laboratory  
www.pharma.cu.edu.eg dir-mau.fopcu@pharma.cu.edu.eg

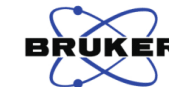

Current Data Parameters  
NAME Paula Soliman\_H\_M31A  
EXPNO 10  
PROCNO 1

F2 - Acquisition Parameters  
Date\_ 20220130  
Time\_ 0.16  
INSTRUM spect  
PROBHD 5 mm PABBO BB/  
PULPROG zg30  
TD 65536  
SOLVENT DMSO  
NS 32  
DS 2  
SWH 8012.820 Hz  
FIDRES 0.122266 Hz  
AQ 4.0894465 sec  
RG 169.46  
DW 62.400 usec  
DE 6.50 usec  
TE 298.0 K  
D1 1.00000000 sec  
TD0 1

===== CHANNEL f1 =====  
SFO1 400.1924713 MHz  
NUC1 1H  
P1 15.00 usec  
PLW1 10.39999962 W

F2 - Processing parameters  
SI 65536  
SF 400.1900000 MHz  
WDW EM  
SSB 0  
LB 0.30 Hz  
GB 0  
PC 1.00

12.4130  
8.1902  
8.1778  
7.9932  
7.9756  
7.6930  
7.6745  
7.6559  
7.5678  
7.5482  
7.5293  
7.3777  
7.3661  
7.3558  
5.8634  
3.3455  
3.0417  
3.0284  
3.0140  
2.5103

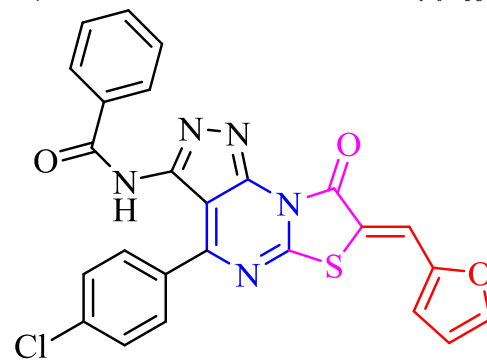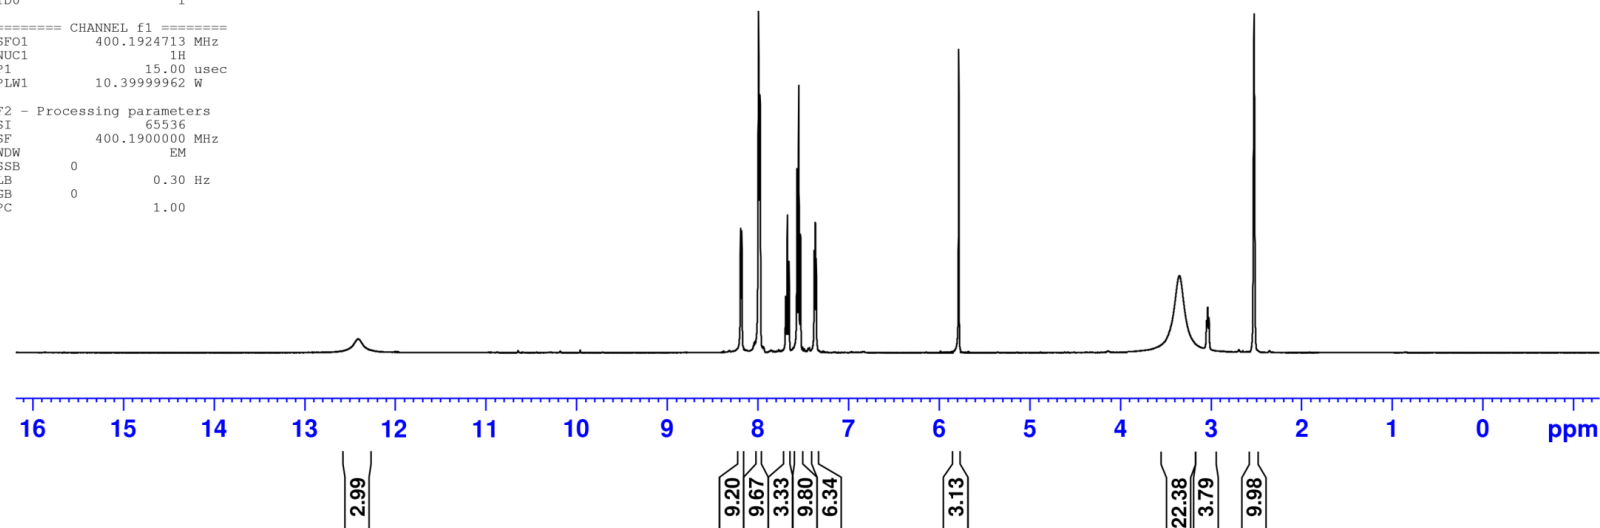

**<sup>1</sup>H-NMR of (E,Z)-N-(4-(4-chlorophenyl)-7-(furan-2-ylmethylene)-8-oxo-7,8-dihydropyrazolo[4,3-e]thiazolo[3,2-a]pyrimidin-3-yl)benzamide (4).**

Paula Soliman\_H\_M31A\_D2O

Microanalytical Unit - FOPCU - NMR laboratory  
www.pharma.cu.edu.eg dir-mau.fopcu@pharma.cu.edu.eg

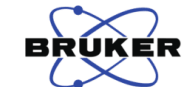

Current Data Parameters  
NAME Paula Soliman\_H\_M31A\_D2O  
EXPNO 10  
PROCNO 1

F2 - Acquisition Parameters  
Date\_ 20220131  
Time 12.08  
INSTRUM spect  
PROBHD 5 mm PABBO BB/  
PULPROG zg30  
TD 65536  
SOLVENT DMSO  
NS 32  
DS 2  
SWH 8012.820 Hz  
FIDRES 0.122266 Hz  
AQ 4.0894465 sec  
RG 169.46  
DW 62.400 usec  
DE 6.50 usec  
TE 298.1 K  
D1 1.00000000 sec  
TD0 1

----- CHANNEL f1 -----  
SF01 400.1924713 MHz  
NUC1 1H  
P1 15.00 usec  
PLW1 10.39999962 W

F2 - Processing parameters  
SI 65536  
SF 400.1900000 MHz  
WDW EM  
SSB 0  
LB 0.30 Hz  
GB 0  
PC 1.00

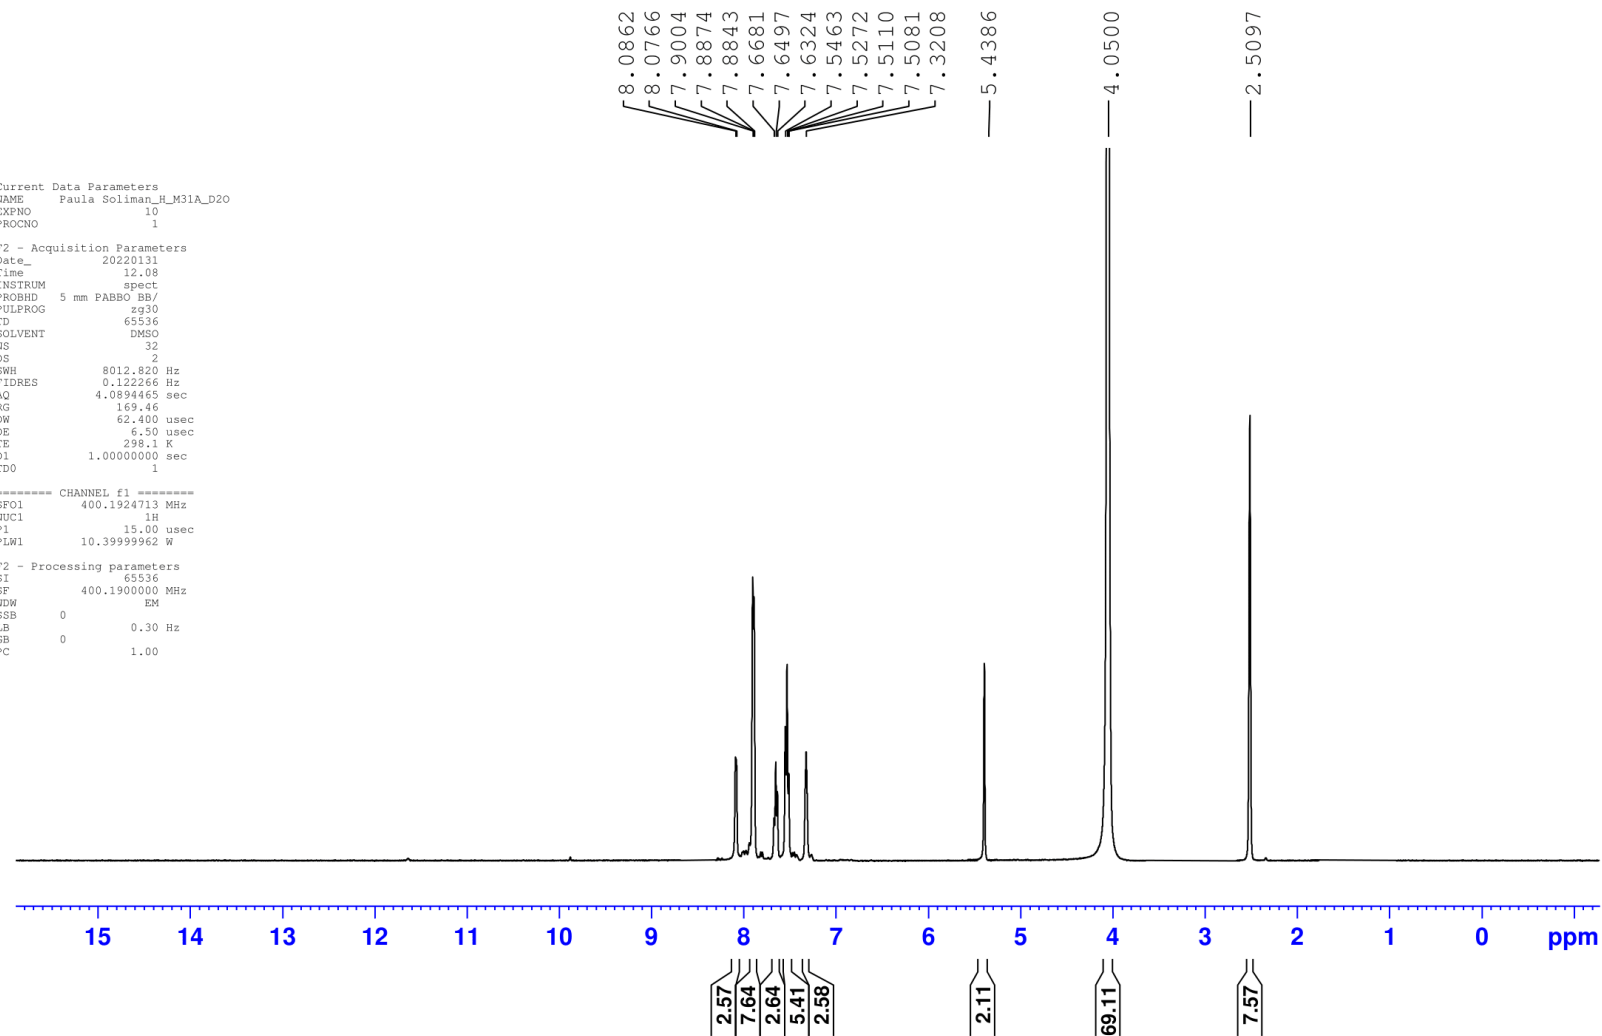

D<sub>2</sub>O of (*E,Z*)-*N*-(4-(4-chlorophenyl)-7-(furan-2-ylmethylene)-8-oxo-7,8-dihydropyrazolo[4,3-*e*]thiazolo[3,2-*a*]pyrimidin-3-yl)benzamide (4).

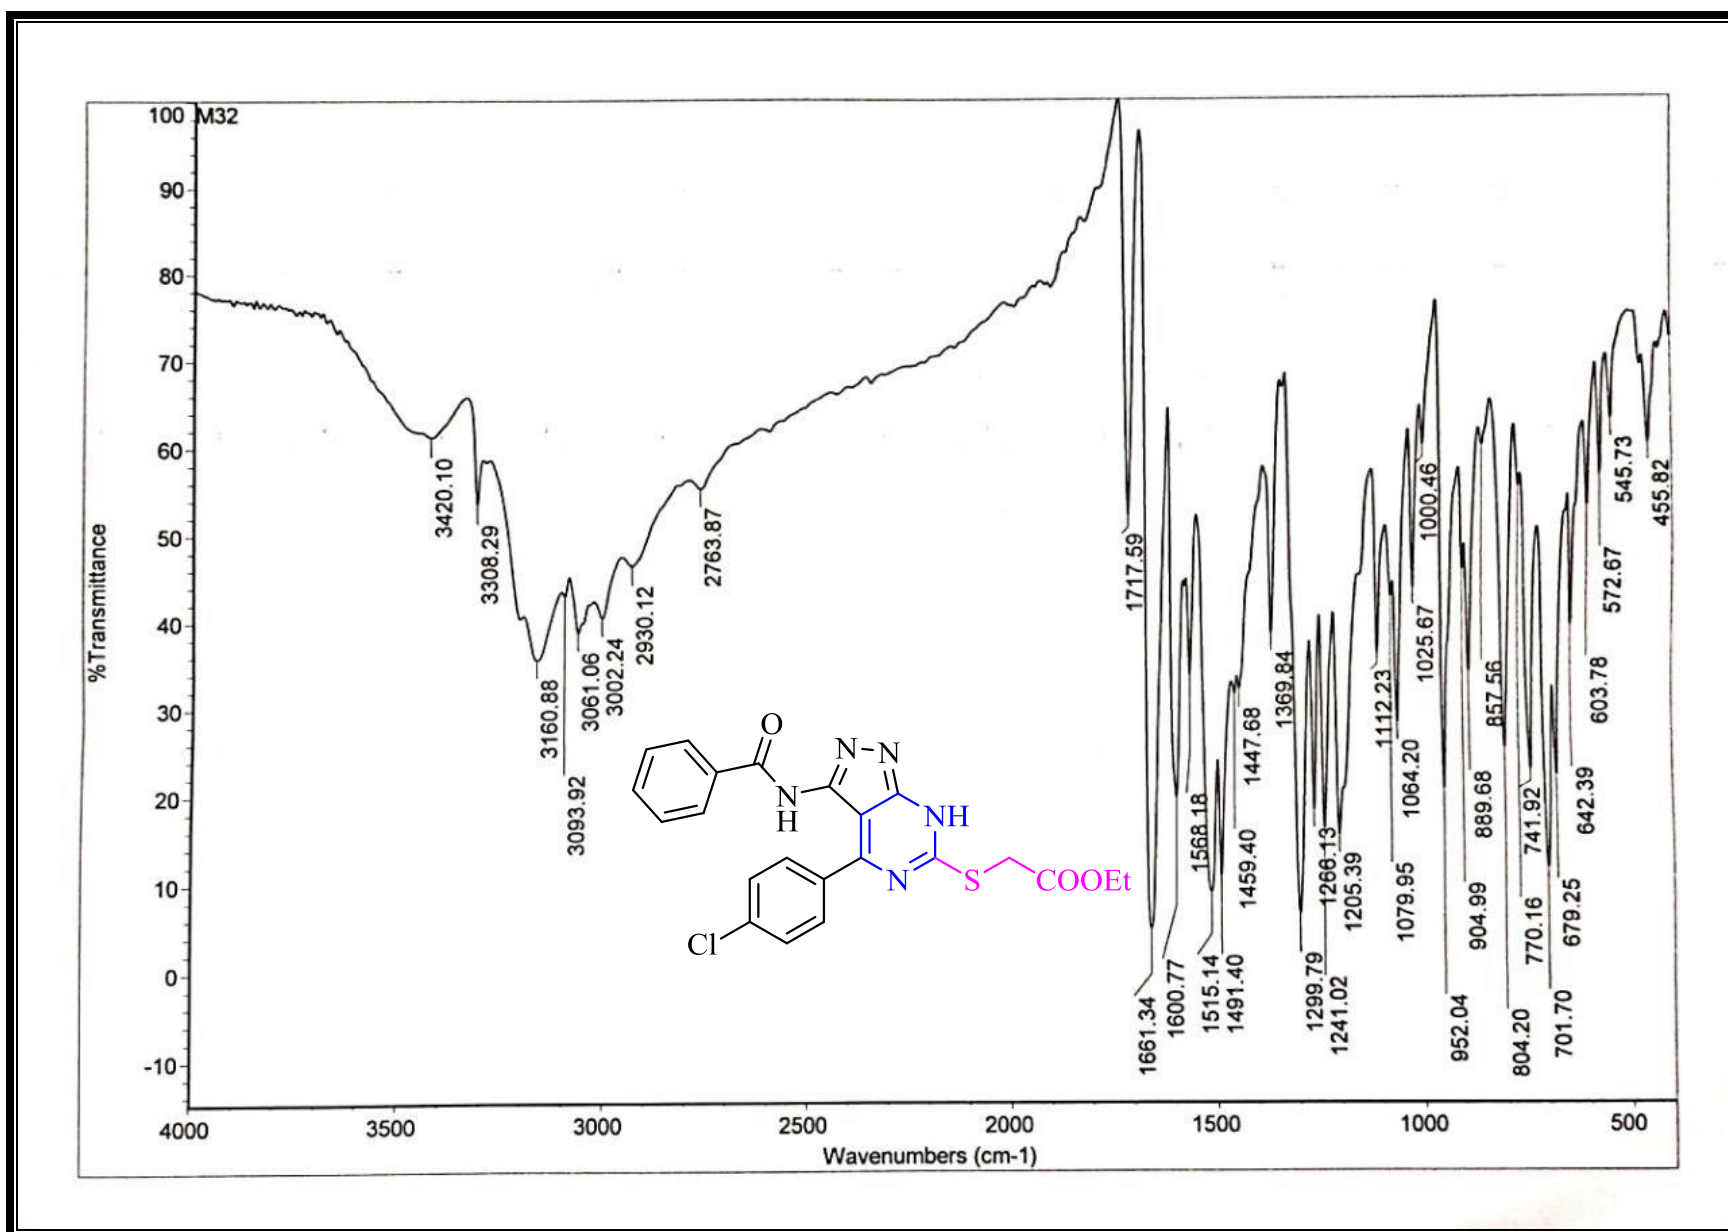

IR of Ethyl 2-((3-benzamido-4-(4-chlorophenyl)-7H-pyrazolo[3,4-d]pyrimidin-6-yl)thio)acetate (5).

Paula Soliman\_H\_M32

Microanalytical Unit - FOPCU - NMR laboratory  
www.pharma.cu.edu.eg dir-mau.fopcu@pharma.cu.edu.eg

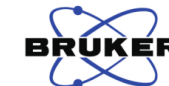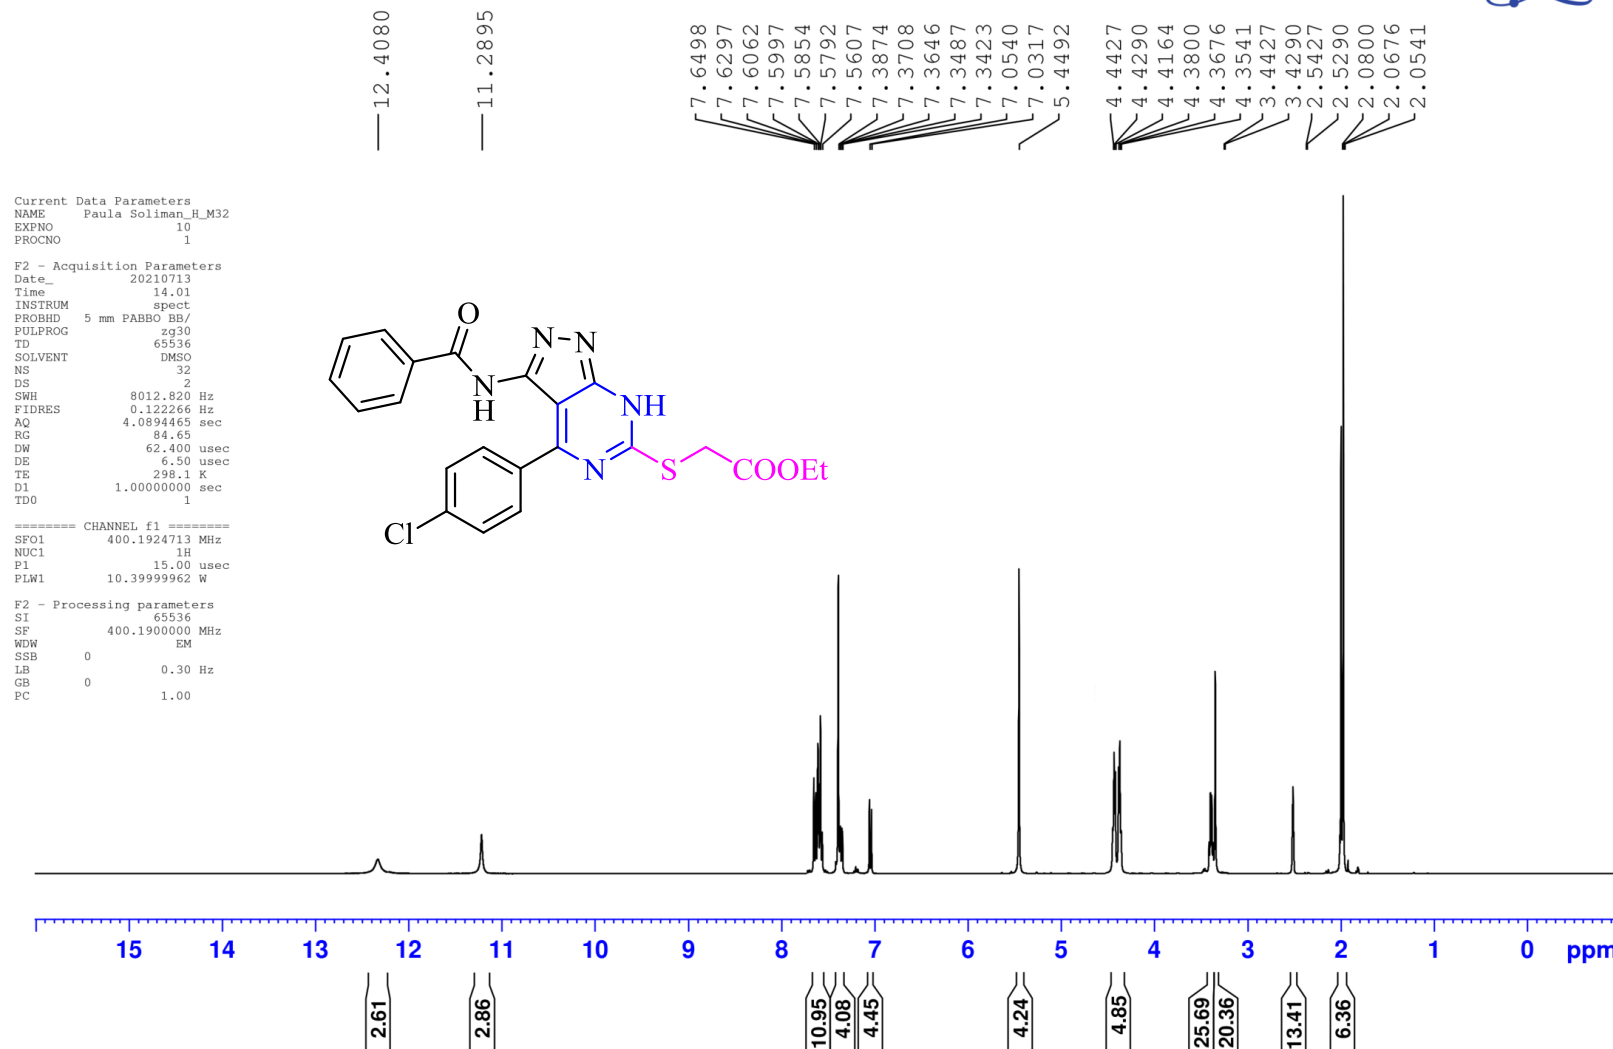

**<sup>1</sup>H-NMR of Ethyl 2-((3-benzamido-4-(4-chlorophenyl)-7H-pyrazolo[3,4-d]pyrimidin-6-yl)thio)acetate (5).**

Paula Soliman\_H\_M32\_D2O

Microanalytical Unit - FOPCU - NMR laboratory  
www.pharma.cu.edu.eg dir-mau.fopcu@pharma.cu.edu.eg

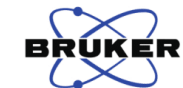

Current Data Parameters  
NAME Paula Soliman\_H\_M32\_D2O  
EXPNO 10  
PROCNO 1

F2 - Acquisition Parameters  
Date\_ 20210713  
Time 16.49  
INSTRUM spect  
PROBHD 5 mm PABBO BB/  
PULPROG zg30  
TD 65536  
SOLVENT DMSO  
NS 32  
DS 2  
SWH 8012.820 Hz  
FIDRES 0.122266 Hz  
AQ 4.0894465 sec  
RG 84.65  
DW 62.400 usec  
DE 6.50 usec  
TE 298.1 K  
D1 1.0000000 sec  
TDO 1

===== CHANNEL f1 =====  
SFO1 400.1924713 MHz  
NUC1 1H  
P1 15.00 usec  
PLW1 10.39999962 W

F2 - Processing parameters  
SI 65536  
SF 400.1900000 MHz  
WDW EM  
SSB 0  
LB 0 0.30 Hz  
GB 0  
PC 1.00

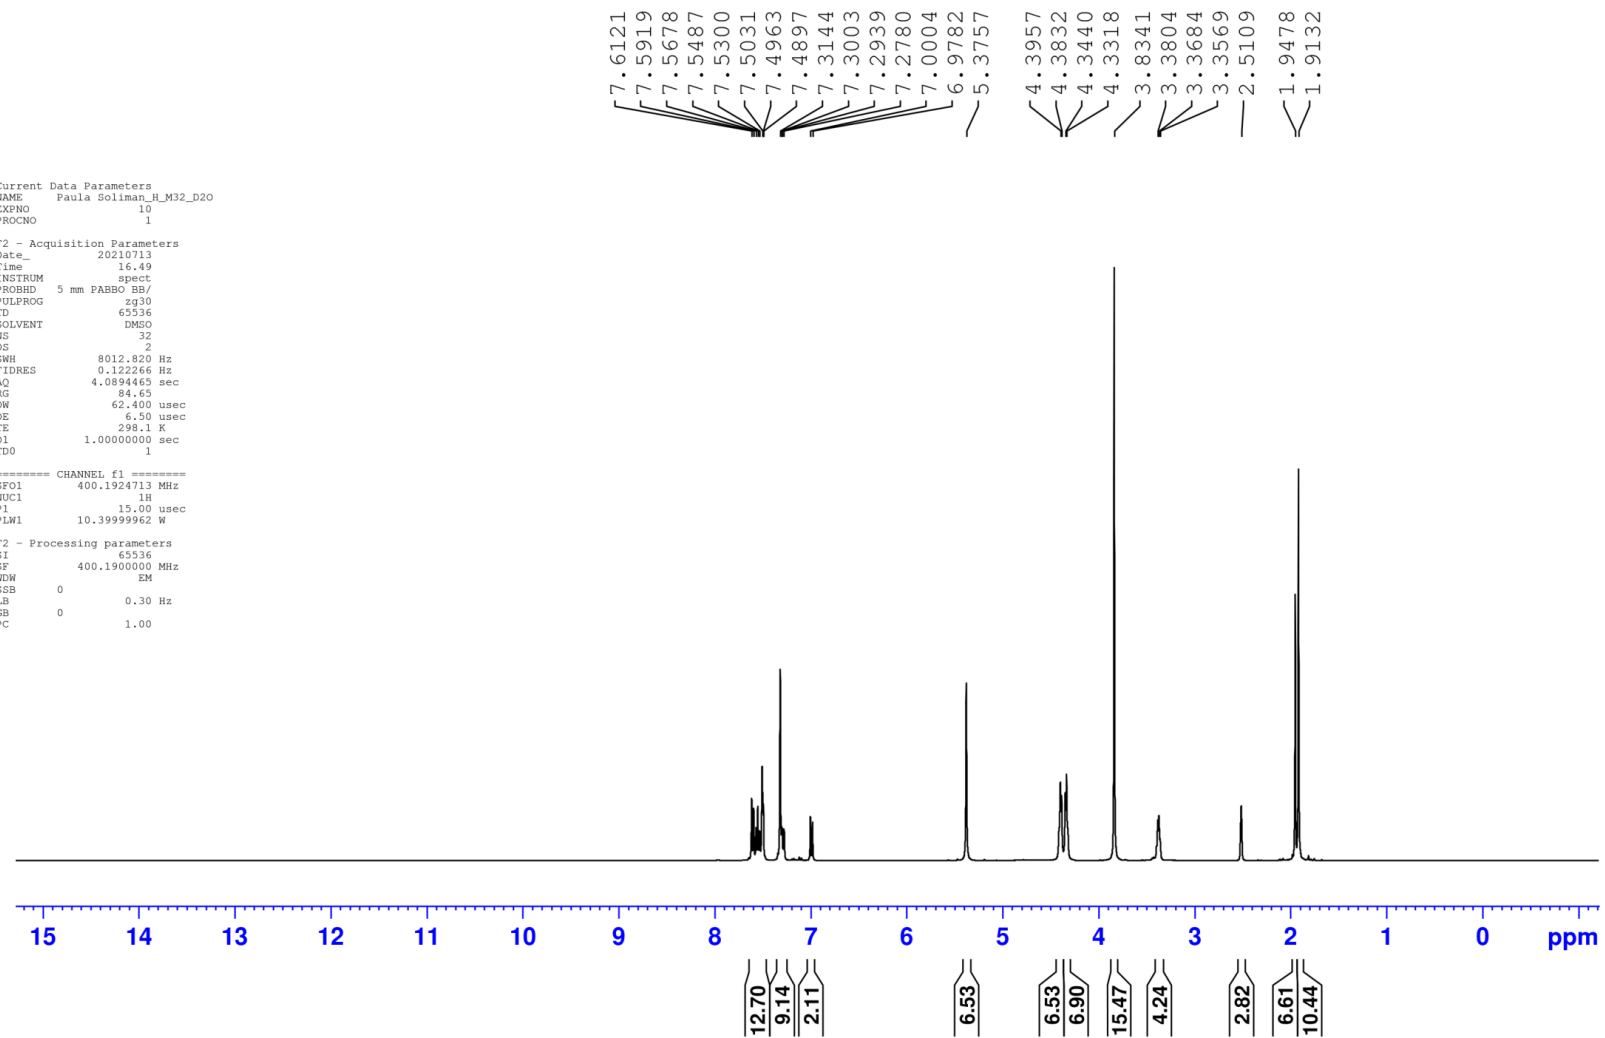

D<sub>2</sub>O of Ethyl 2-((3-benzamido-4-(4-chlorophenyl)-7H-pyrazolo[3,4-d]pyrimidin-6-yl)thio)acetate (5).

Paula Soliman\_C\_M32

Microanalytical Unit - FOPCU - NMR laboratory  
www.pharma.cu.edu.eg dir-mau.fopcu@pharma.cu.edu.eg

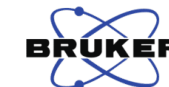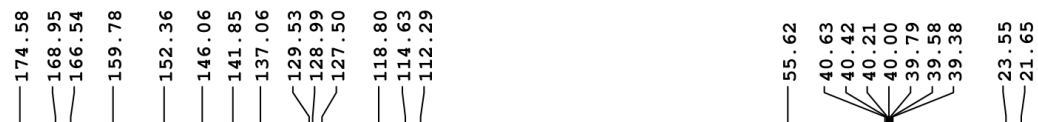

Current Data Parameters  
NAME Paula Soliman\_C\_M32  
EXPNO 10  
PROCNO 1

F2 - Acquisition Parameters  
Date\_ 20210713  
Time 15.00  
INSTRUM spect  
PROBHD 5 mm PABBO BB/  
PULPROG zgpg30  
TD 65536  
SOLVENT DMSO  
NS 1500  
DS 4  
SWH 24038.461 Hz  
FIDRES 0.366798 Hz  
AQ 1.3631488 sec  
RG 202.37  
DW 20.800 usec  
DE 6.50 usec  
TE 298.0 K  
D1 2.00000000 sec  
D11 0.03000000 sec  
TD0 1

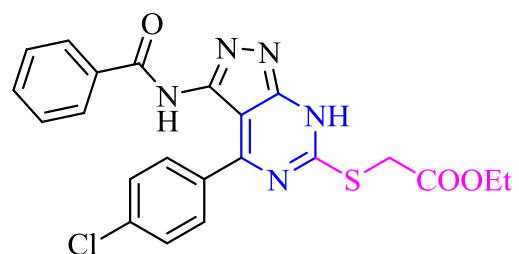

==== CHANNEL f1 =====  
SFO1 100.6379178 MHz  
NUC1 13C  
P1 10.00 usec  
PLW1 45.00000000 W  
==== CHANNEL f2 =====  
SFO2 400.1916008 MHz  
NUC2 1H  
CPDPRG[2] waltz16

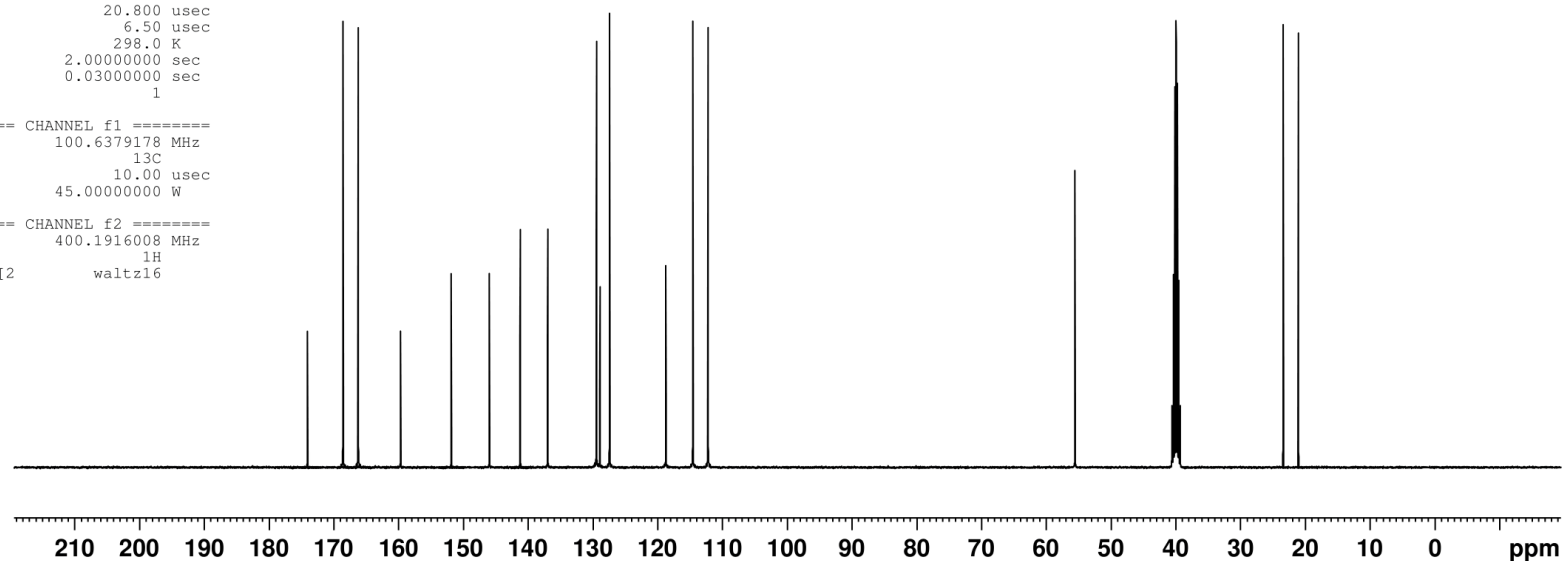

<sup>13</sup>C-NMR of Ethyl 2-((3-benzamido-4-(4-chlorophenyl)-7H-pyrazolo[3,4-d]pyrimidin-6-yl)thio)acetate (5).



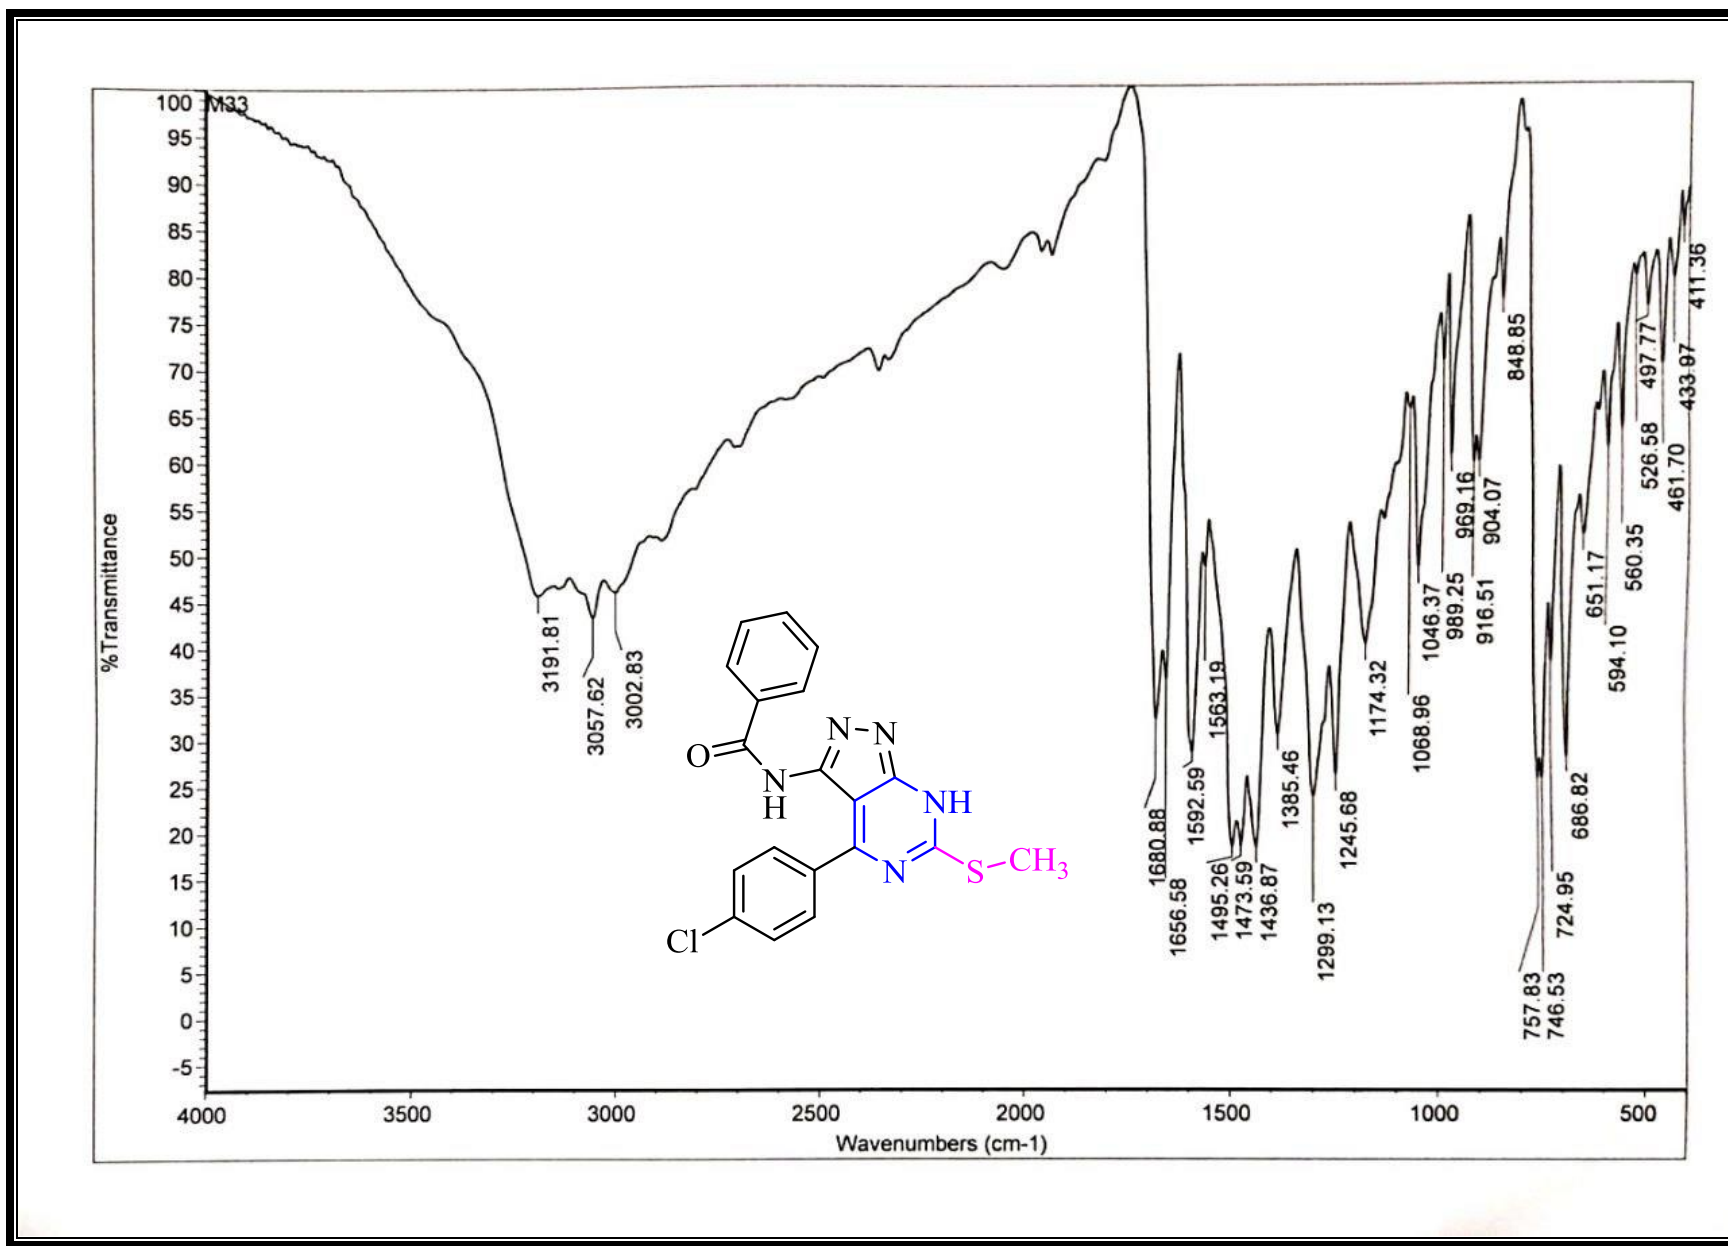

IR of *N*-(4-(4-chlorophenyl)-6-(methylthio)-7H-pyrazolo[3,4-d]pyrimidin-3-yl)benzamide (6).

Paula Soliman\_H\_M33

Microanalytical Unit - FOPCU - NMR laboratory  
www.pharma.cu.edu.eg dir-mau.fopcu@pharma.cu.edu.eg

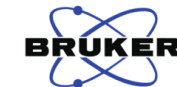

—13.6373

—11.7813

8.0511  
8.0487  
7.8008  
7.7923  
6.7867  
6.7825  
6.7778  
6.7736

3.5716  
3.3497  
2.5144  
2.5103  
2.5064

Current Data Parameters  
NAME Paula Soliman\_H\_M33  
EXPNO 10  
PROCNO 1

F2 - Acquisition Parameters  
Date\_ 20210712  
Time 2.05  
INSTRUM spect  
PROBHD 5 mm PABBO BB/  
PULPROG zg30  
TD 65536  
SOLVENT DMSO  
NS 32  
DS 2  
SWH 8012.820 Hz  
FIDRES 0.122266 Hz  
AQ 4.0894465 sec  
RG 180.8  
DW 62.400 usec  
DE 6.50 usec  
TE 298.0 K  
D1 1.0000000 sec  
TD0 1

===== CHANNEL f1 =====  
SFO1 400.1924713 MHz  
NUC1 1H  
P1 15.00 usec  
PLW1 10.39999962 W

F2 - Processing parameters  
SI 65536  
SF 400.1900000 MHz  
WDW EM  
SSB 0  
LB 0.30 Hz  
GB 0  
PC 1.00

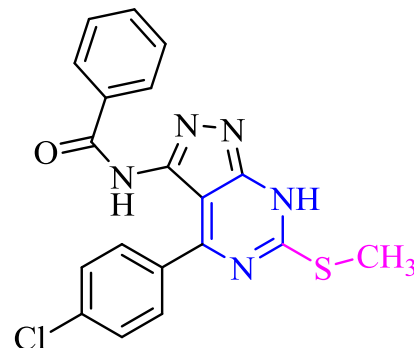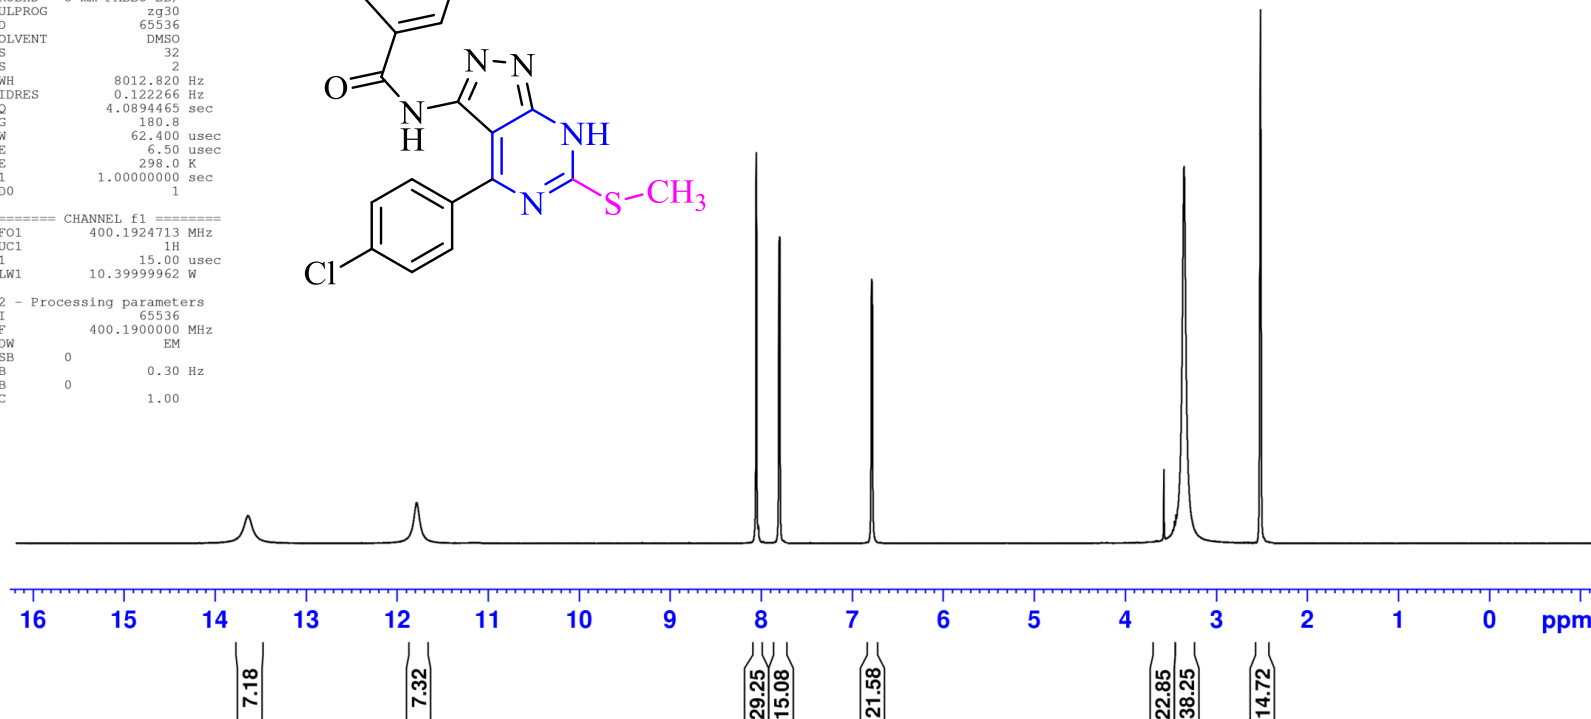

<sup>1</sup>H-NMR of *N*-(4-(4-chlorophenyl)-6-(methylthio)-7H-pyrazolo[3,4-d]pyrimidin-3-yl)benzamide (6).

Paula Soliman\_H\_M33\_D2O

Microanalytical Unit - FOPCU - NMR laboratory  
www.pharma.cu.edu.eg dir-mau.fopcu@pharma.cu.edu.eg

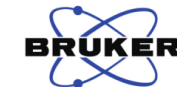

Current Data Parameters  
NAME Paula Soliman\_H\_M33\_D2O  
EXPNO 10  
PROCNO 1

F2 - Acquisition Parameters  
Date\_ 20210712  
Time 4.05  
INSTRUM spect  
PROBHD 5 mm PABBO BB/  
PULPROG zg30  
TD 65536  
SOLVENT DMSO  
NS 32  
DS 2  
SWH 8012.820 Hz  
FIDRES 0.122266 Hz  
AQ 4.0894465 sec  
RG 180.8  
DW 62.400 usec  
DE 6.50 usec  
TE 298.1 K  
D1 1.0000000 sec  
TDO 1

----- CHANNEL f1 -----  
SFO1 400.1924713 MHz  
NUC1 1H  
P1 15.00 usec  
PLW1 10.39999962 W

F2 - Processing parameters  
SI 65536  
SF 400.1900000 MHz  
WDW EM  
SSB 0  
LB 0.30 Hz  
GB 0  
PC 1.00

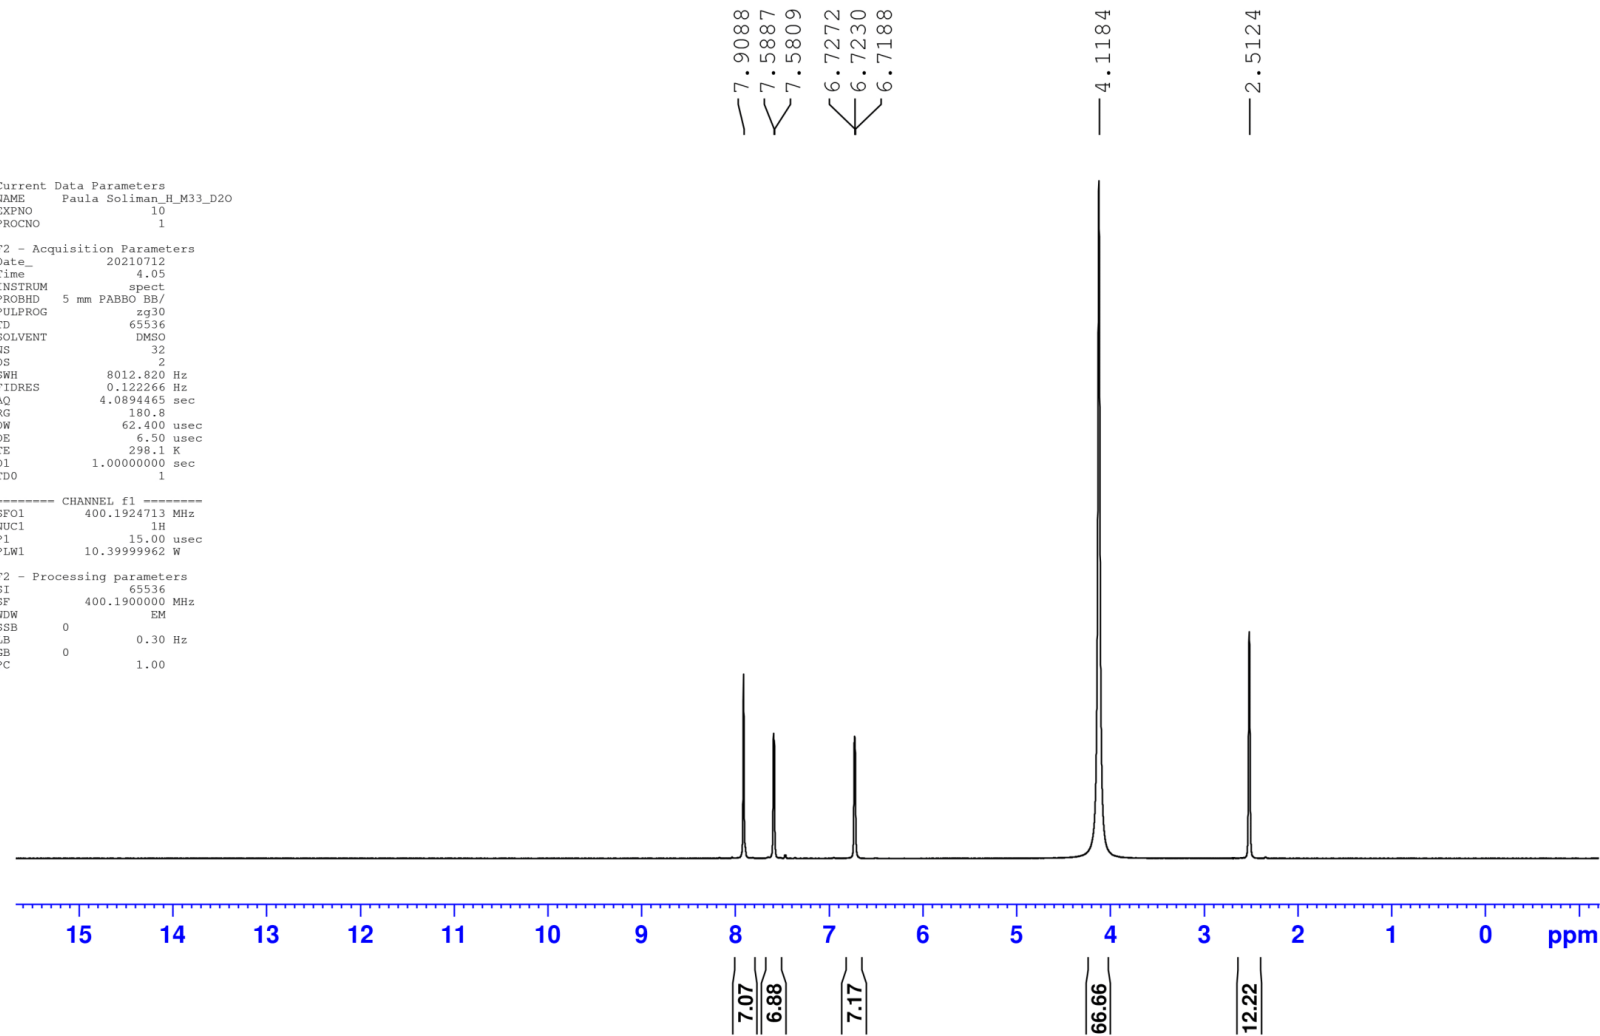

D<sub>2</sub>O of *N*-(4-(4-chlorophenyl)-6-(methylthio)-7H-pyrazolo[3,4-d]pyrimidin-3-yl)benzamide (6).

Paula Soliman\_C\_M33

Microanalytical Unit - FOPCU - NMR laboratory  
www.pharma.cu.edu.eg dir-mau.fopcu@pharma.cu.edu.eg

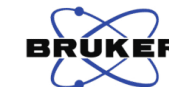

168.23  
167.20  
148.00  
145.40  
144.81  
141.45  
133.28  
131.22  
128.79  
124.75  
121.58  
116.93  
113.34

40.61  
40.40  
40.20  
39.99  
39.78  
39.57  
39.36

15.65

Current Data Parameters  
NAME Paula Soliman\_C\_M33  
EXPNO 10  
PROCNO 1

F2 - Acquisition Parameters  
Date\_ 20210712  
Time 3.14  
INSTRUM spect  
PROBHD 5 mm PABBO BB/  
PULPROG zgpg30  
TD 65536  
SOLVENT DMSO  
NS 1200  
DS 4  
SWH 24038.461 Hz  
FIDRES 0.366798 Hz  
AQ 1.3631488 sec  
RG 202.37  
DW 20.800 usec  
DE 6.50 usec  
TE 298.1 K  
D1 2.00000000 sec  
D11 0.03000000 sec  
TD0 1

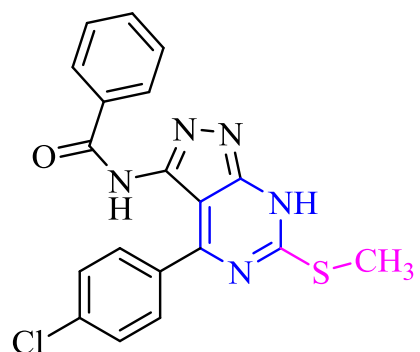

==== CHANNEL f1 =====  
SFO1 100.6379178 MHz  
NUC1 13C  
P1 10.00 usec  
PLW1 45.00000000 W  
==== CHANNEL f2 =====  
SFO2 400.1916008 MHz  
NUC2 1H  
CPDPRG[2] waltz16

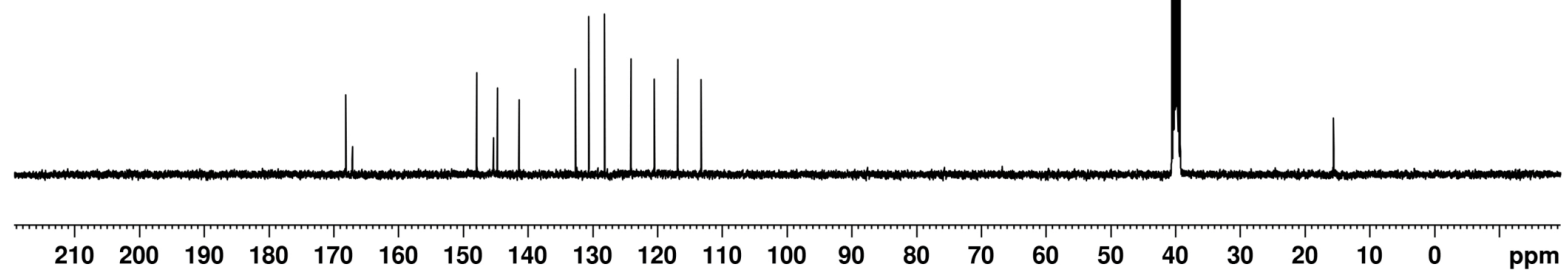

<sup>13</sup>C-NMR of *N*-(4-(4-chlorophenyl)-6-(methylthio)-7H-pyrazolo[3,4-d]pyrimidin-3-yl)benzamide (6).

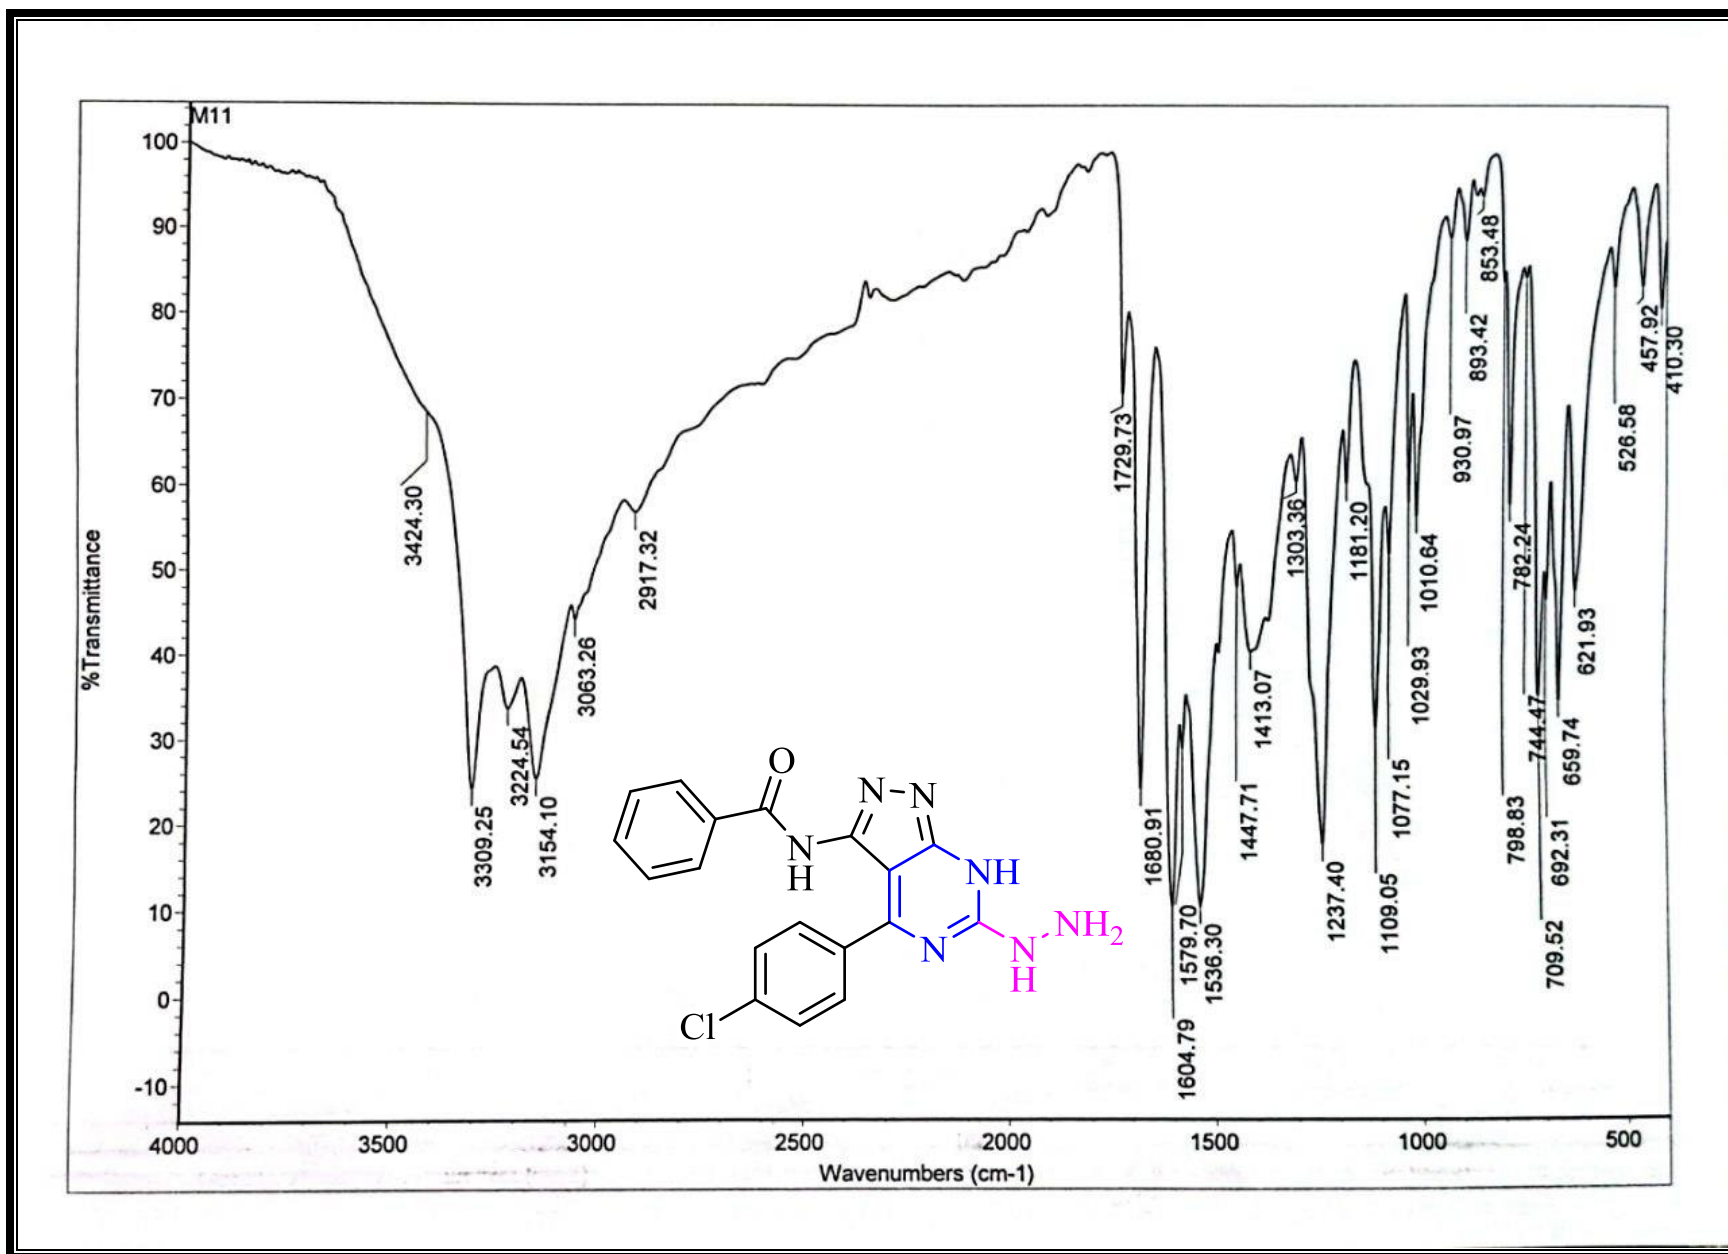

IR of *N*-(4-(4-chlorophenyl)-6-hydrazineyl-7H-pyrazolo[3,4-d]pyrimidin-3-yl)benzamide (7).

Paula Soliman\_H\_M11

Microanalytical Unit - FOPCU - NMR laboratory  
www.pharma.cu.edu.eg dir-mau.fopcu@pharma.cu.edu.eg

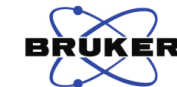

— 13.6932  
< 12.8543  
12.8481

8.0382  
7.7815  
7.7075  
7.6991  
7.2727  
6.7639  
6.7603  
6.7557  
6.7519

— 3.3959  
— 2.5102

Current Data Parameters  
NAME Paula Soliman\_H\_M11  
EXPNO 10  
PROCNO 1

F2 - Acquisition Parameters  
Date\_ 20210712  
Time 1.19  
INSTRUM spect  
PROBHD 5 mm PABBO BB/  
PULPROG zg30  
TD 65536  
SOLVENT DMSO  
NS 32  
DS 2  
SWH 8012.820 Hz  
FIDRES 0.122266 Hz  
AQ 4.0894465 sec  
RG 169.46  
DW 62.400 usec  
DE 6.50 usec  
TE 298.1 K  
D1 1.0000000 sec  
TD0 1

===== CHANNEL f1 =====  
SFO1 400.1924713 MHz  
NUC1 1H  
P1 15.00 usec  
PLW1 10.39999962 W

F2 - Processing parameters  
SI 65536  
SF 400.1900000 MHz  
WDW EM  
SSB 0  
LB 0.30 Hz  
GB 0  
PC 1.00

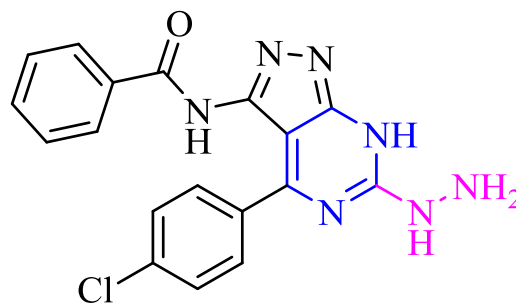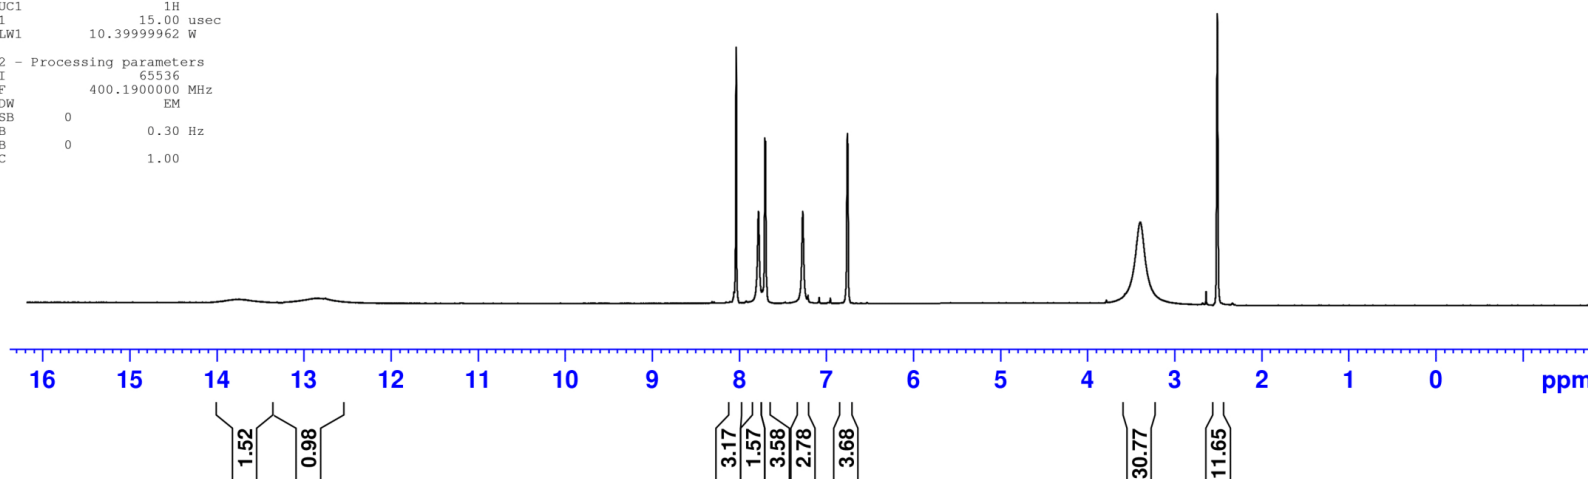

**<sup>1</sup>H-NMR of N-(4-(4-chlorophenyl)-6-hydrazineyl-7H-pyrazolo[3,4-d]pyrimidin-3-yl)benzamide (7).**

Paula Soliman\_H\_M11\_D2O

Microanalytical Unit - FOPCU - NMR laboratory  
www.pharma.cu.edu.eg dir-mau.fopcu@pharma.cu.edu.eg

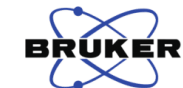

Current Data Parameters  
NAME Paula Soliman\_H\_M11\_D2O  
EXPNO 10  
PROCNO 1

F2 - Acquisition Parameters  
Date\_ 20210712  
Time 3.39  
INSTRUM spect  
PROBHD 5 mm PABBO BB/  
PULPROG zg30  
TD 65536  
SOLVENT DMSO  
NS 32  
DS 2  
SWH 8012.820 Hz  
FIDRES 0.122266 Hz  
AQ 4.0894465 sec  
RG 169.46  
DW 62.400 usec  
DE 6.50 usec  
TE 298.1 K  
D1 1.0000000 sec  
TD0 1

----- CHANNEL f1 -----  
SFO1 400.1924713 MHz  
NUC1 1H  
P1 15.00 usec  
PLW1 10.39999962 W

F2 - Processing parameters  
SI 65536  
SF 400.1900000 MHz  
WDW EM  
SSB 0  
LB 0.30 Hz  
GB 0  
PC 1.00

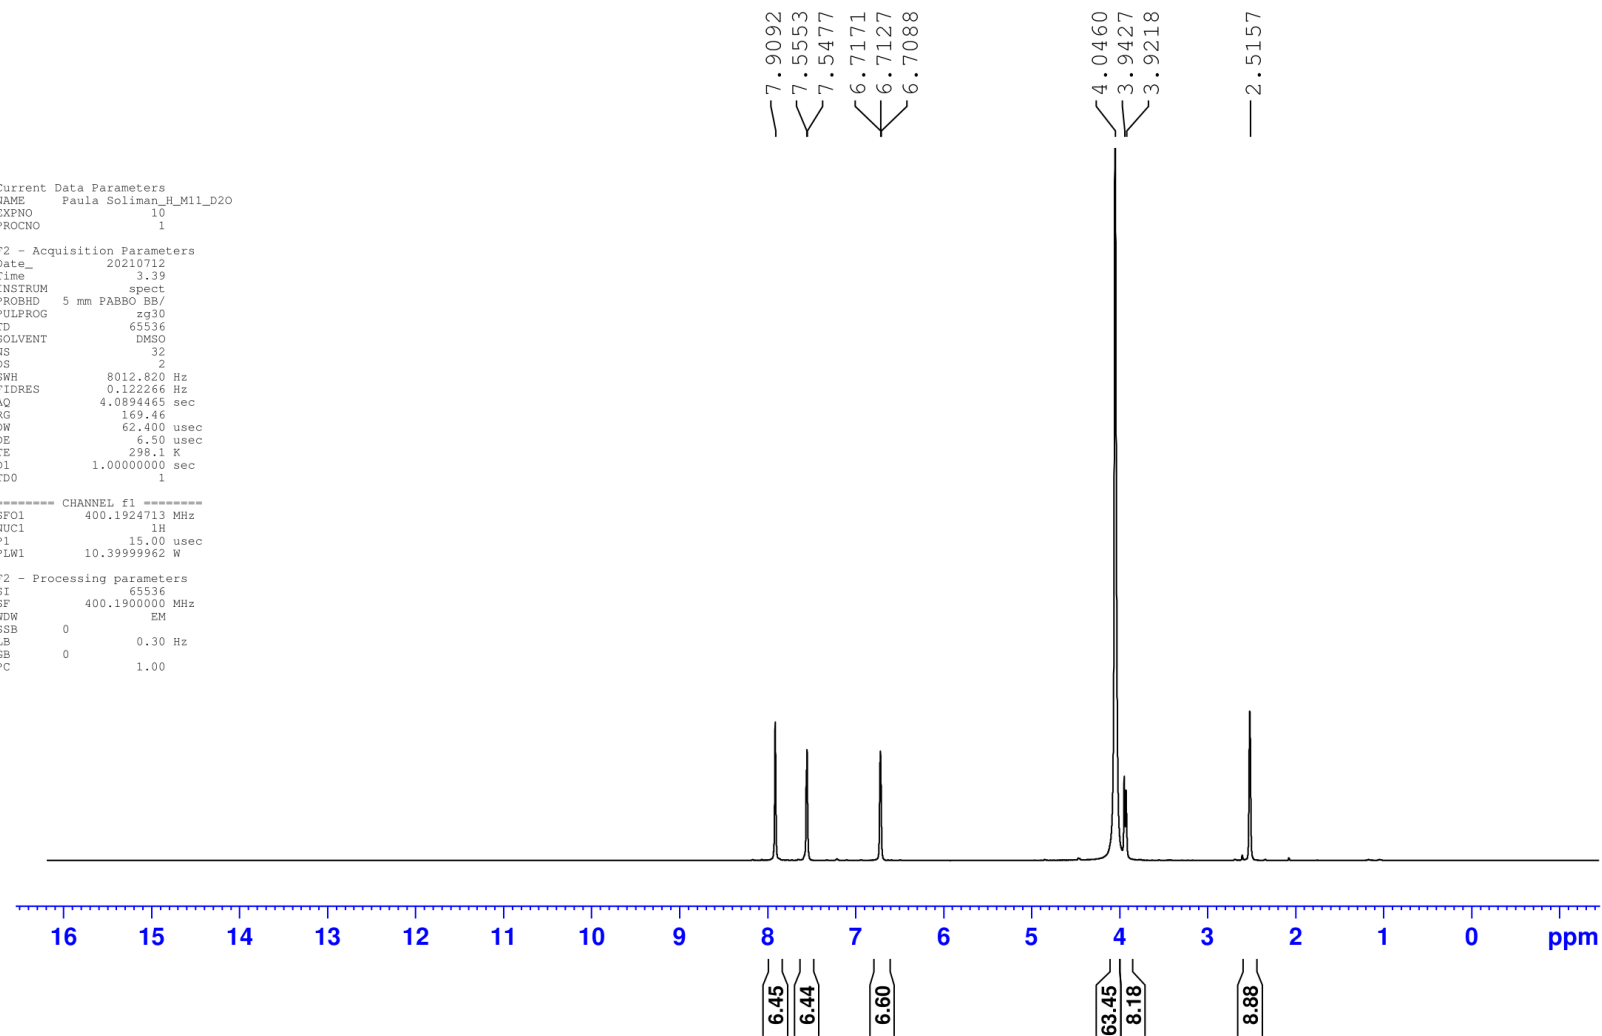

D<sub>2</sub>O of N-(4-(4-chlorophenyl)-6-hydrazineyl-7H-pyrazolo[3,4-d]pyrimidin-3-yl)benzamide (7).

Paula Soliman\_C\_M11

Microanalytical Unit - FOPCU - NMR laboratory  
www.pharma.cu.edu.eg dir-mau.fopcu@pharma.cu.edu.eg

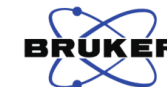

169.81  
160.28  
159.08  
156.27  
148.04  
140.38  
134.43  
131.66  
129.98  
128.56  
126.08  
123.69  
123.33  
117.61  
112.88

40.61  
40.40  
40.19  
39.98  
39.78  
39.57  
39.36

Current Data Parameters  
NAME Paula Soliman\_C\_M11  
EXPNO 10  
PROCNO 1

F2 - Acquisition Parameters  
Date\_ 20210712  
Time 2.29  
INSTRUM spect  
PROBHD 5 mm PABBO BB/  
PULPROG zgpg30  
TD 65536  
SOLVENT DMSO  
NS 1200  
DS 4  
SWH 24038.461 Hz  
FIDRES 0.366798 Hz  
AQ 1.3631488 sec  
RG 202.37  
DW 20.800 usec  
DE 6.50 usec  
TE 298.1 K  
D1 2.00000000 sec  
D11 0.03000000 sec  
TD0 1

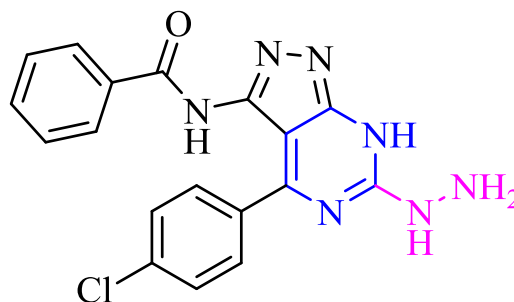

==== CHANNEL f1 =====  
SFO1 100.6379178 MHz  
NUC1 13C  
P1 10.00 usec  
PLW1 45.00000000 W  
  
==== CHANNEL f2 =====  
SFO2 400.1916008 MHz  
NUC2 1H  
CPDPRG[2] waltz16

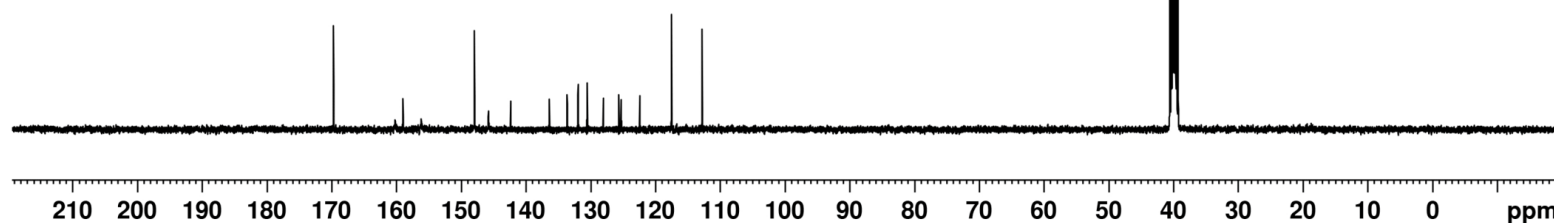

**<sup>13</sup>C-NMR of N-(4-(4-chlorophenyl)-6-hydrazineyl-7H-pyrazolo[3,4-d]pyrimidin-3-yl)benzamide (7).**



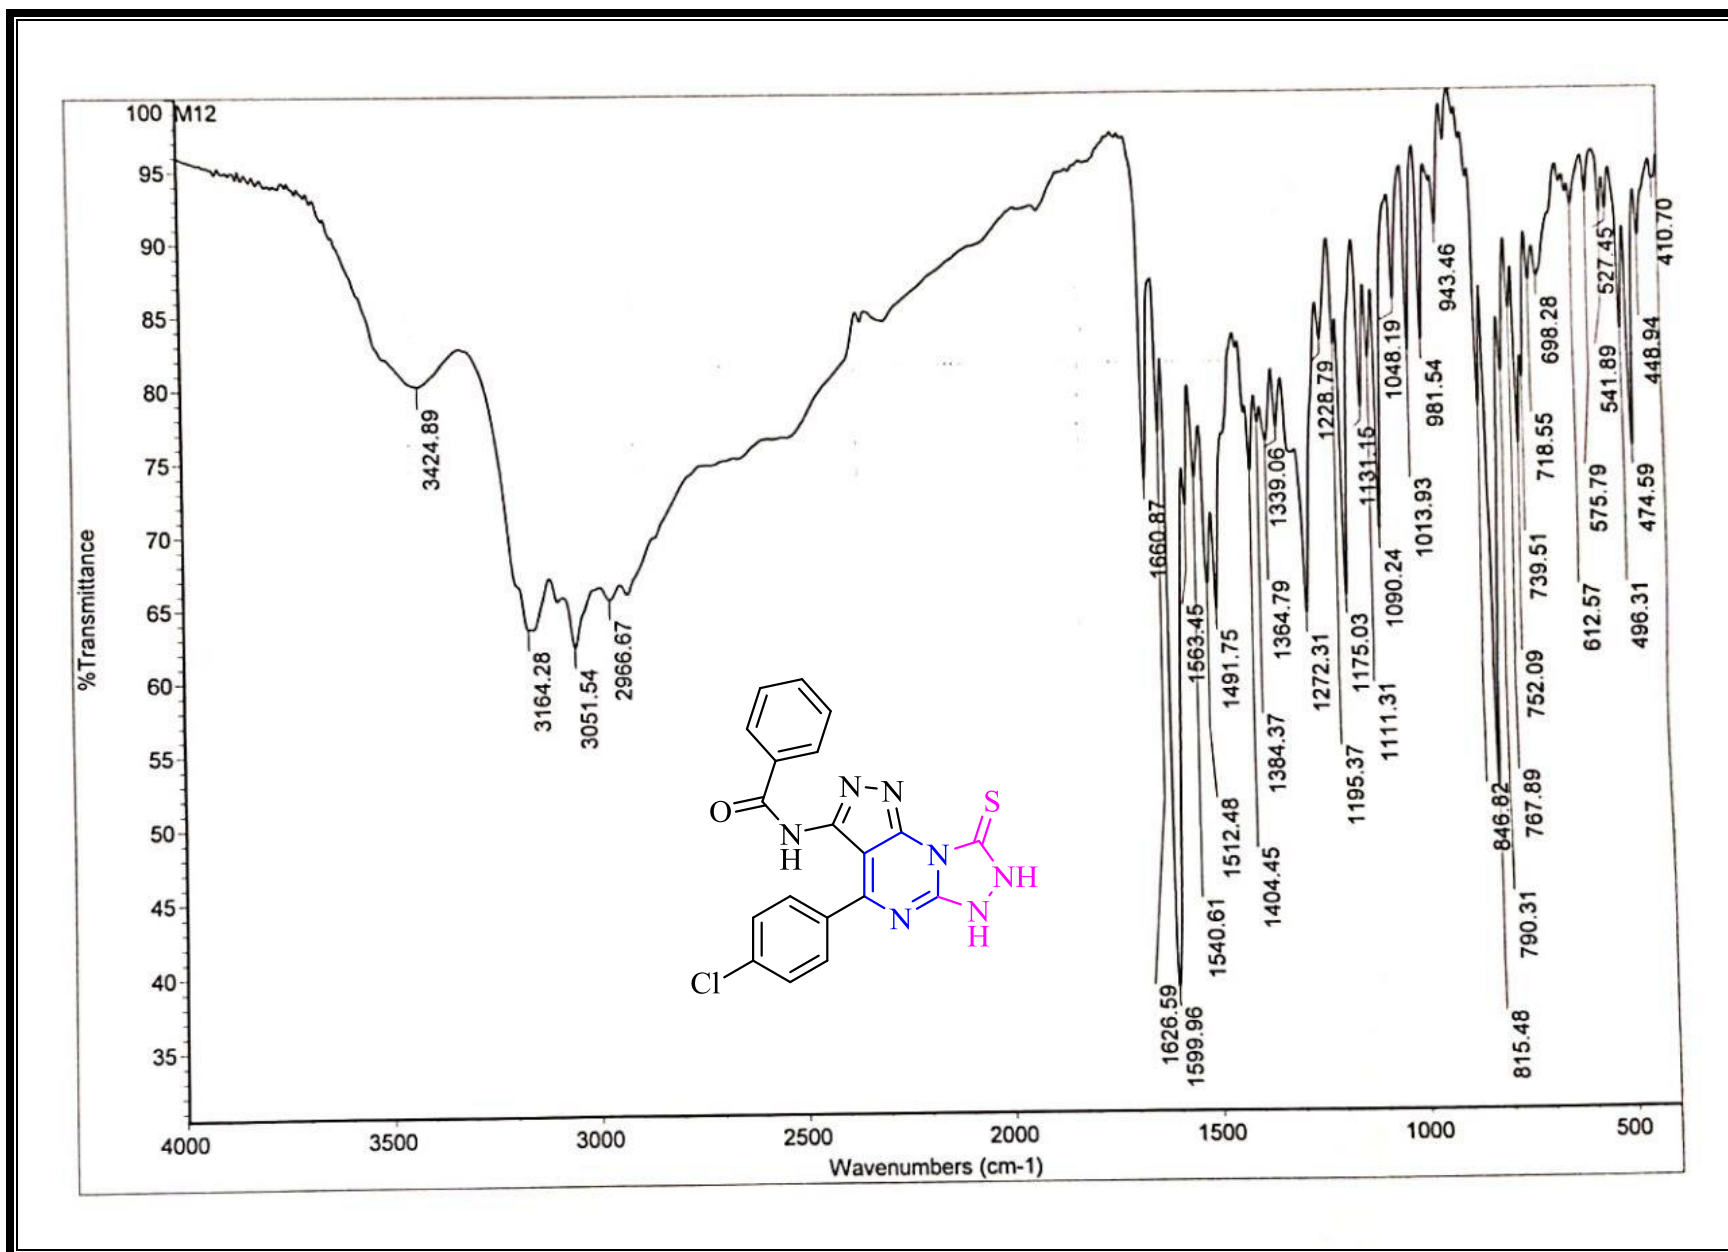

IR of *N*-(4-(4-chlorophenyl)-8-thioxo-7,8-dihydro-6H-pyrazolo[4,3-*e*][1,2,4]triazolo[4,3-*a*]pyrimidin-3-yl)benzamide (8).

Paula Soliman\_H\_M12

Microanalytical Unit - FOPCU - NMR laboratory  
www.pharma.cu.edu.eg dir-mau.fopcu@pharma.cu.edu.eg

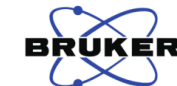

13.3986  
13.3549

11.4474

8.2514  
8.0630  
8.0479  
8.0417  
7.7193  
7.7107  
7.6686  
7.6472  
6.7718  
6.7677  
6.7631  
6.7591

3.3455  
3.0417  
3.0284  
3.0140  
2.5103

Current Data Parameters  
NAME Paula Soliman\_H\_M12  
EXPNO 10  
PROCNO 1

F2 - Acquisition Parameters  
Date\_ 20210711  
Time 13.50  
INSTRUM spect  
PROBHD 5 mm PABBO BB/  
PULPROG zg30  
TD 65536  
SOLVENT DMSO  
NS 32  
DS 2  
SWH 8012.820 Hz  
FIDRES 0.122266 Hz  
AQ 4.0894465 sec  
RG 169.46  
DW 62.400 usec  
DE 6.50 usec  
TE 298.1 K  
D1 1.0000000 sec  
TD0 1

===== CHANNEL f1 =====  
SFO1 400.1924713 MHz  
NUC1 1H  
P1 15.00 usec  
PLW1 10.39999962 W

F2 - Processing parameters  
SI 65536  
SF 400.1900000 MHz  
WDW EM  
SSB 0  
LB 0.30 Hz  
GB 0  
PC 1.00

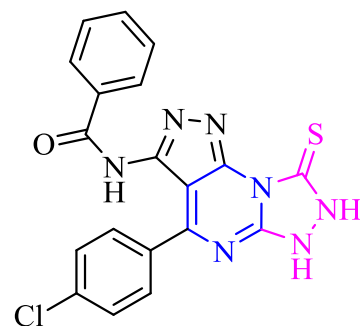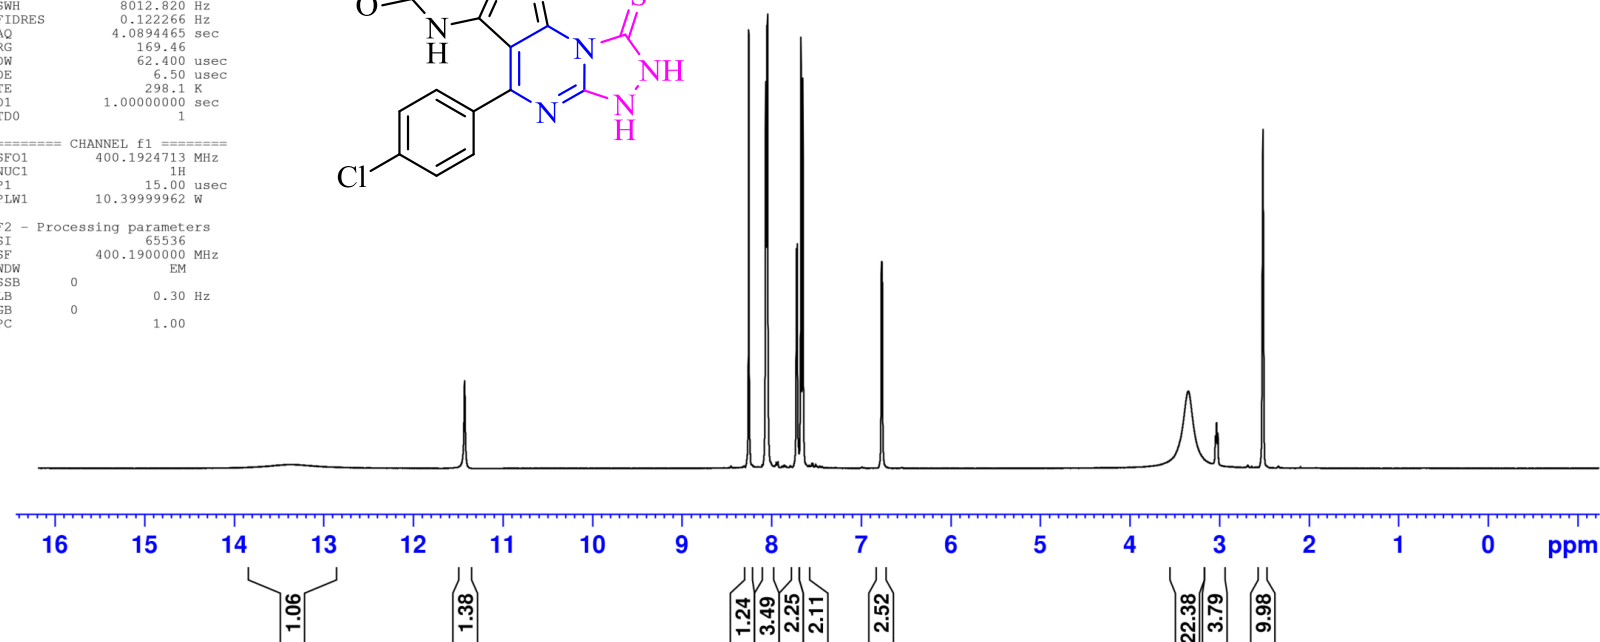

<sup>1</sup>H-NMR of *N*-(4-(4-chlorophenyl)-8-thioxo-7,8-dihydro-6H-pyrazolo[4,3-e][1,2,4]triazolo[4,3-a]pyrimidin-3-yl)benzamide (8).

Paula Soliman\_H\_M12\_D2O

Microanalytical Unit - FOPCU - NMR laboratory  
www.pharma.cu.edu.eg dir-mau.fopcu@pharma.cu.edu.eg

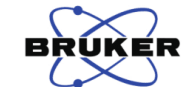

Current Data Parameters  
NAME Paula Soliman\_H\_M12\_D2O  
EXPNO 10  
PROCNO 1

F2 - Acquisition Parameters  
Date\_ 20210711  
Time 15.26  
INSTRUM spect  
PROBHD 5 mm PABBO BB/  
PULPROG zg30  
TD 65536  
SOLVENT DMSO  
NS 32  
DS 2  
SWH 8012.820 Hz  
FIDRES 0.122266 Hz  
AQ 4.0894465 sec  
RG 169.46  
DW 62.400 usec  
DE 6.50 usec  
TE 298.0 K  
D1 1.00000000 sec  
TD0 1

----- CHANNEL f1 -----  
SF01 400.1924713 MHz  
NUC1 1H  
P1 15.00 usec  
PLW1 10.39999962 W

F2 - Processing parameters  
SI 65536  
SF 400.1900000 MHz  
WDW EM  
SSB 0  
LB 0.30 Hz  
GB 0  
PC 1.00

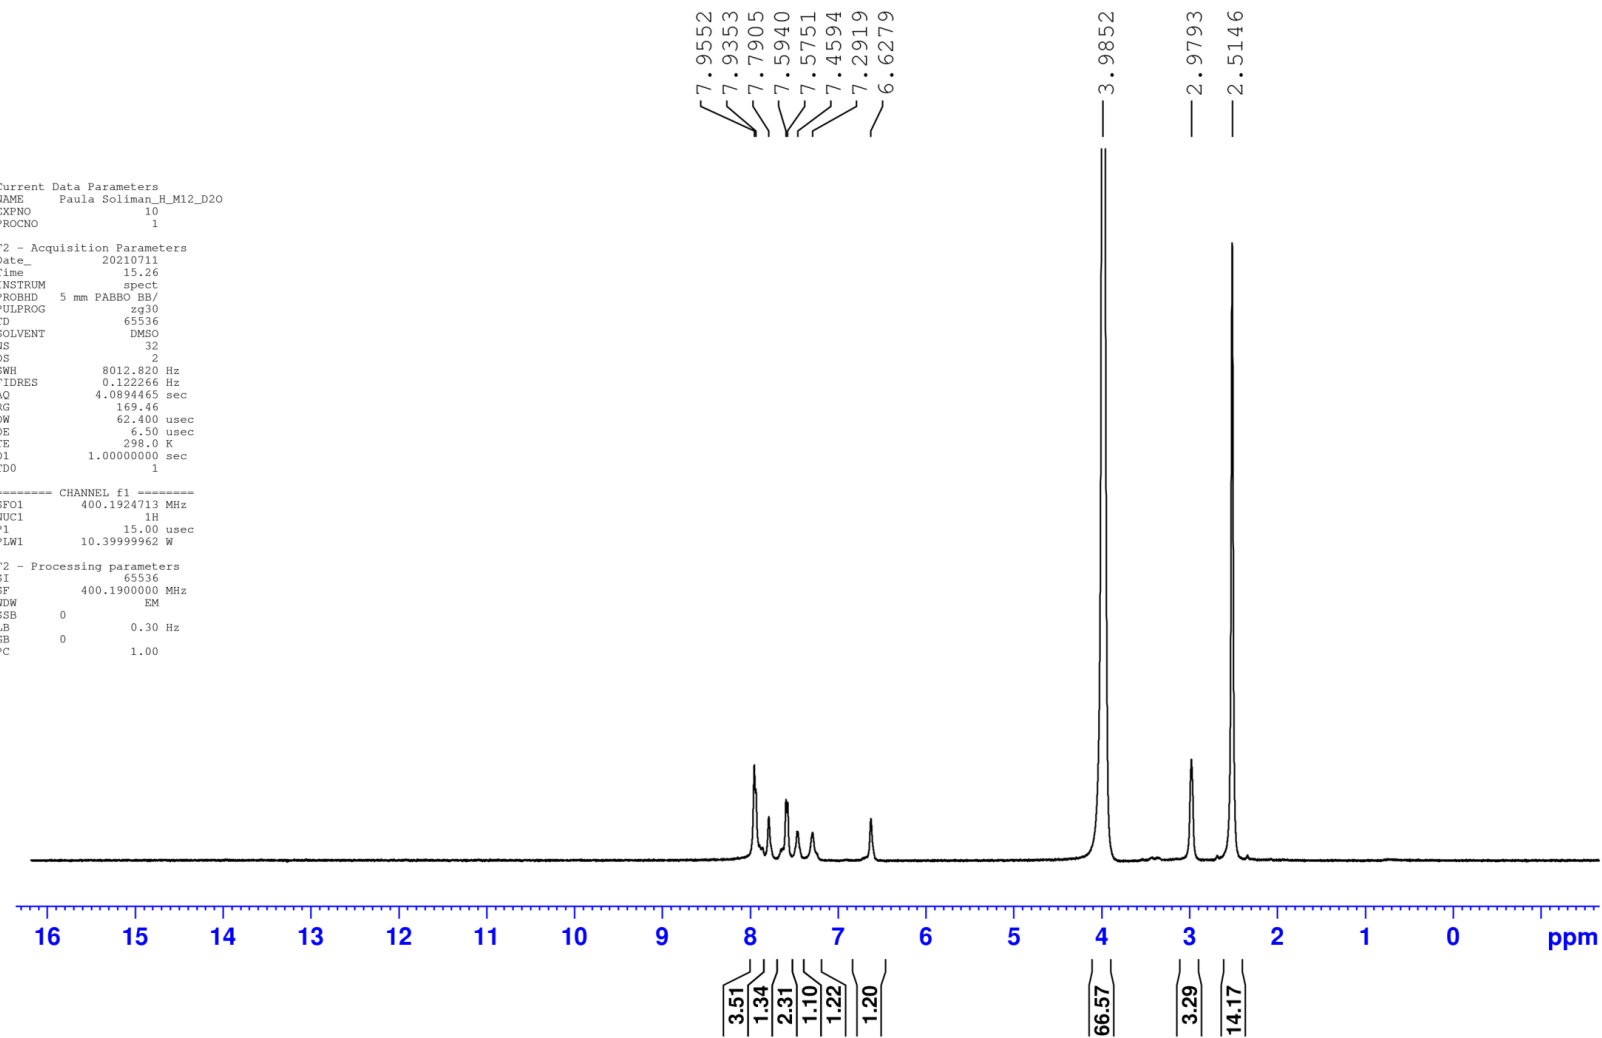

D<sub>2</sub>O of *N*-(4-(4-chlorophenyl)-8-thioxo-7,8-dihydro-6H-pyrazolo[4,3-*e*][1,2,4]triazolo[4,3-*a*]pyrimidin-3-yl)benzamide (8).

Paula Soliman\_C\_M12

Microanalytical Unit - FOPCU - NMR laboratory  
www.pharma.cu.edu.eg dir-mau.fopcu@pharma.cu.edu.eg

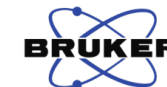

171.52  
160.49  
159.10  
156.91  
148.22  
146.39  
146.12  
136.85  
132.04  
131.93  
129.74  
117.93  
115.85  
112.94  
40.62  
40.41  
40.20  
39.99  
39.78  
39.58  
39.37

Current Data Parameters  
NAME Paula Soliman\_C\_M12  
EXPNO 10  
PROCNO 1

F2 - Acquisition Parameters  
Date\_ 20210711  
Time 2.00  
INSTRUM spect  
PROBHD 5 mm PABBO BB/  
PULPROG zgpg30  
TD 65536  
SOLVENT DMSO  
NS 1200  
DS 4  
SWH 24038.461 Hz  
FIDRES 0.366798 Hz  
AQ 1.3631488 sec  
RG 202.37  
DW 20.800 usec  
DE 6.50 usec  
TE 298.1 K  
D1 2.00000000 sec  
D11 0.03000000 sec  
TD0 1

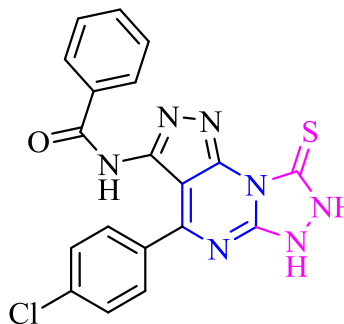

==== CHANNEL f1 =====  
SFO1 100.6379178 MHz  
NUC1 13C  
P1 10.00 usec  
PLW1 45.00000000 W  
  
==== CHANNEL f2 =====  
SFO2 400.1916008 MHz  
NUC2 1H  
CPDPRG[2] waltz16

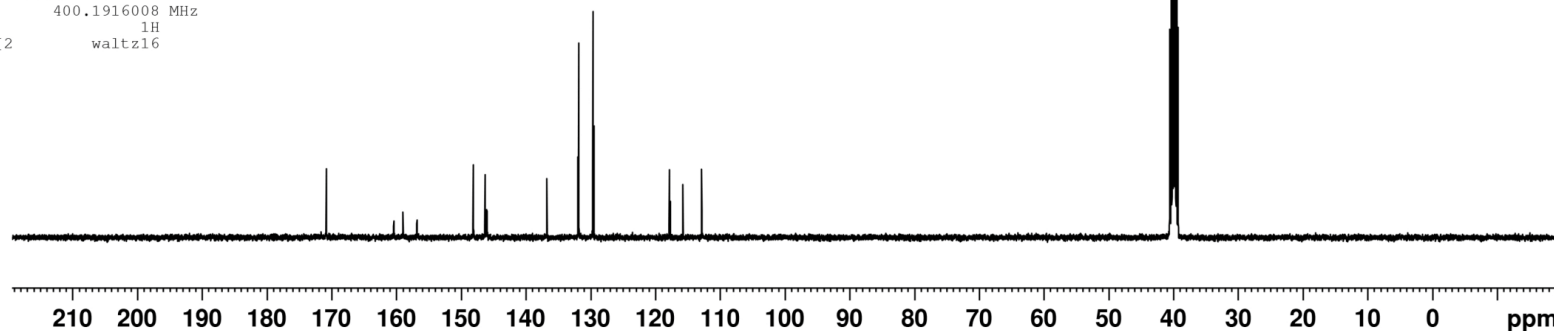

<sup>13</sup>C-NMR of *N*-(4-(4-chlorophenyl)-8-thioxo-7,8-dihydro-6H-pyrazolo[4,3-e][1,2,4]triazolo[4,3-a]pyrimidin-3-yl)benzamide (8).

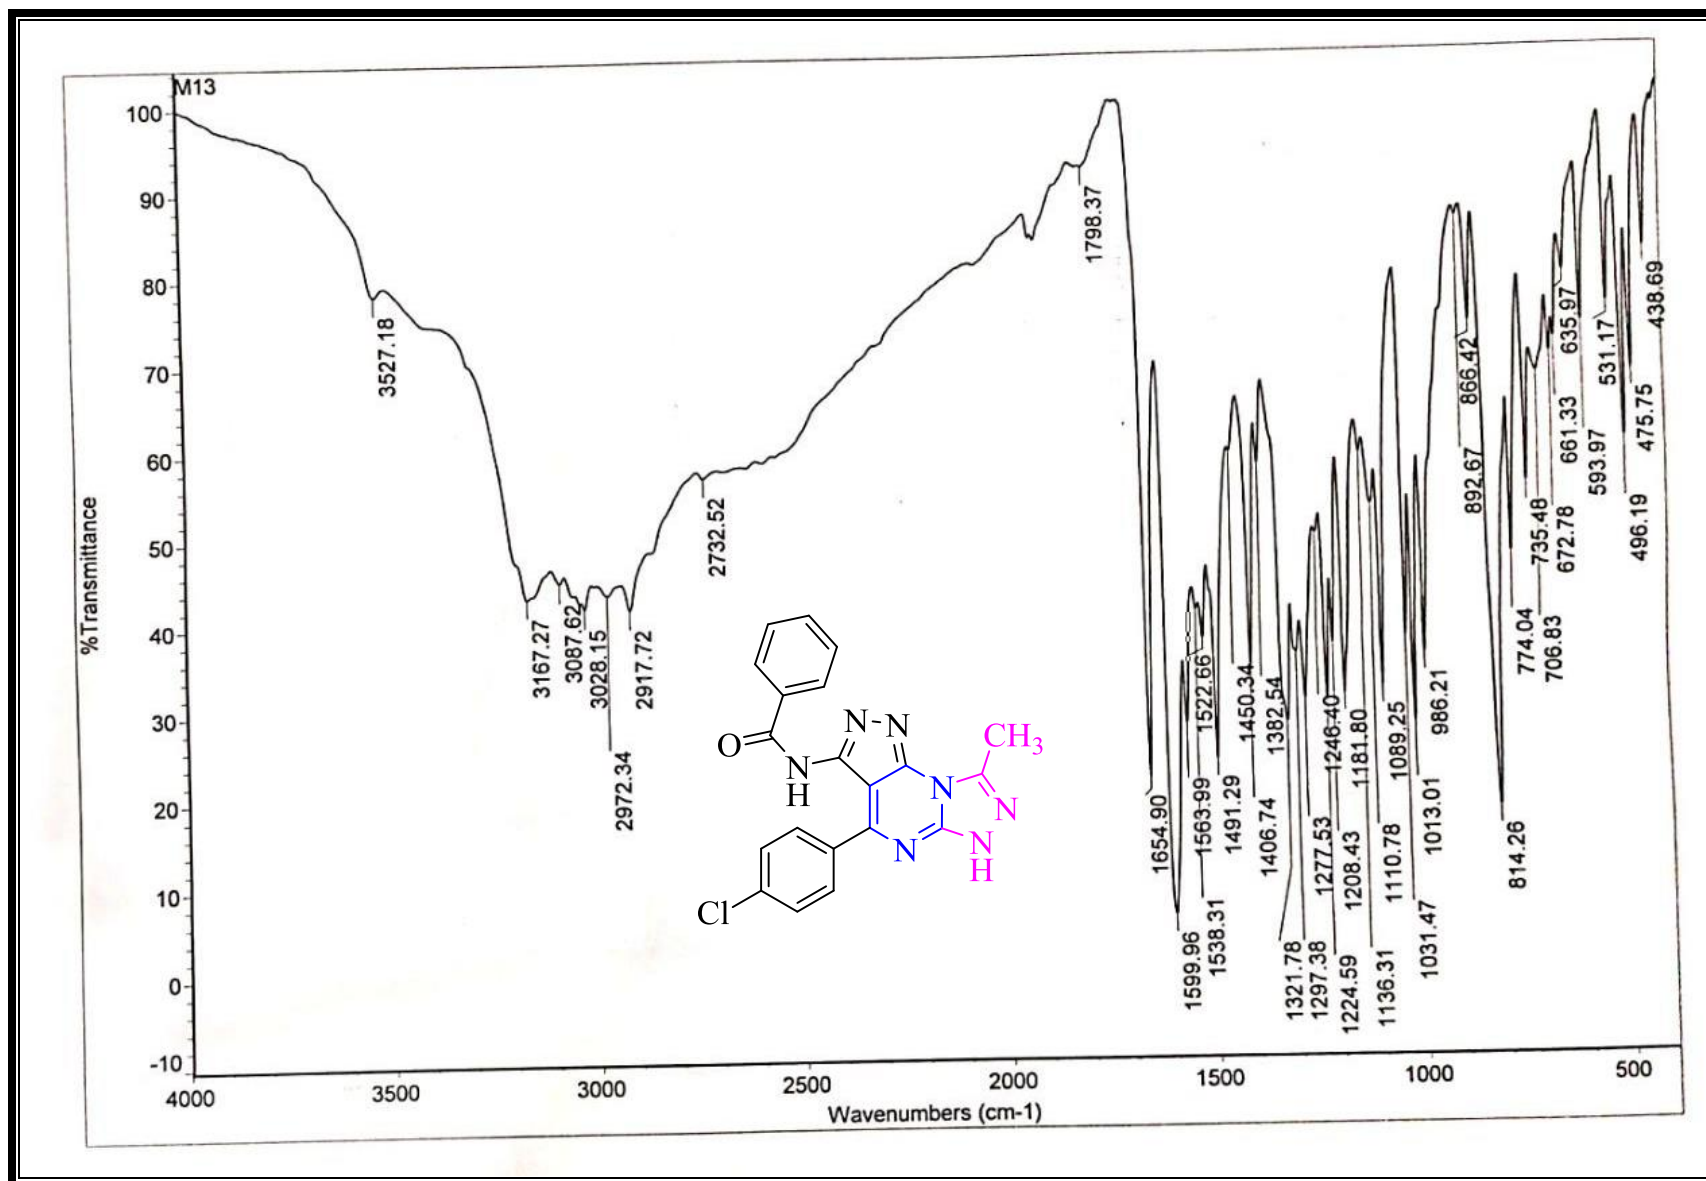

IR of *N*-(4-(4-chlorophenyl)-8-methyl-6H-pyrazolo[4,3-*e*][1,2,4]triazolo[4,3-*a*]pyrimidin-3-yl)benzamide (9).

Paula Soliman\_H\_M13

Microanalytical Unit - FOPCU - NMR laboratory  
www.pharma.cu.edu.eg dir-mau.fopcu@pharma.cu.edu.eg

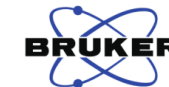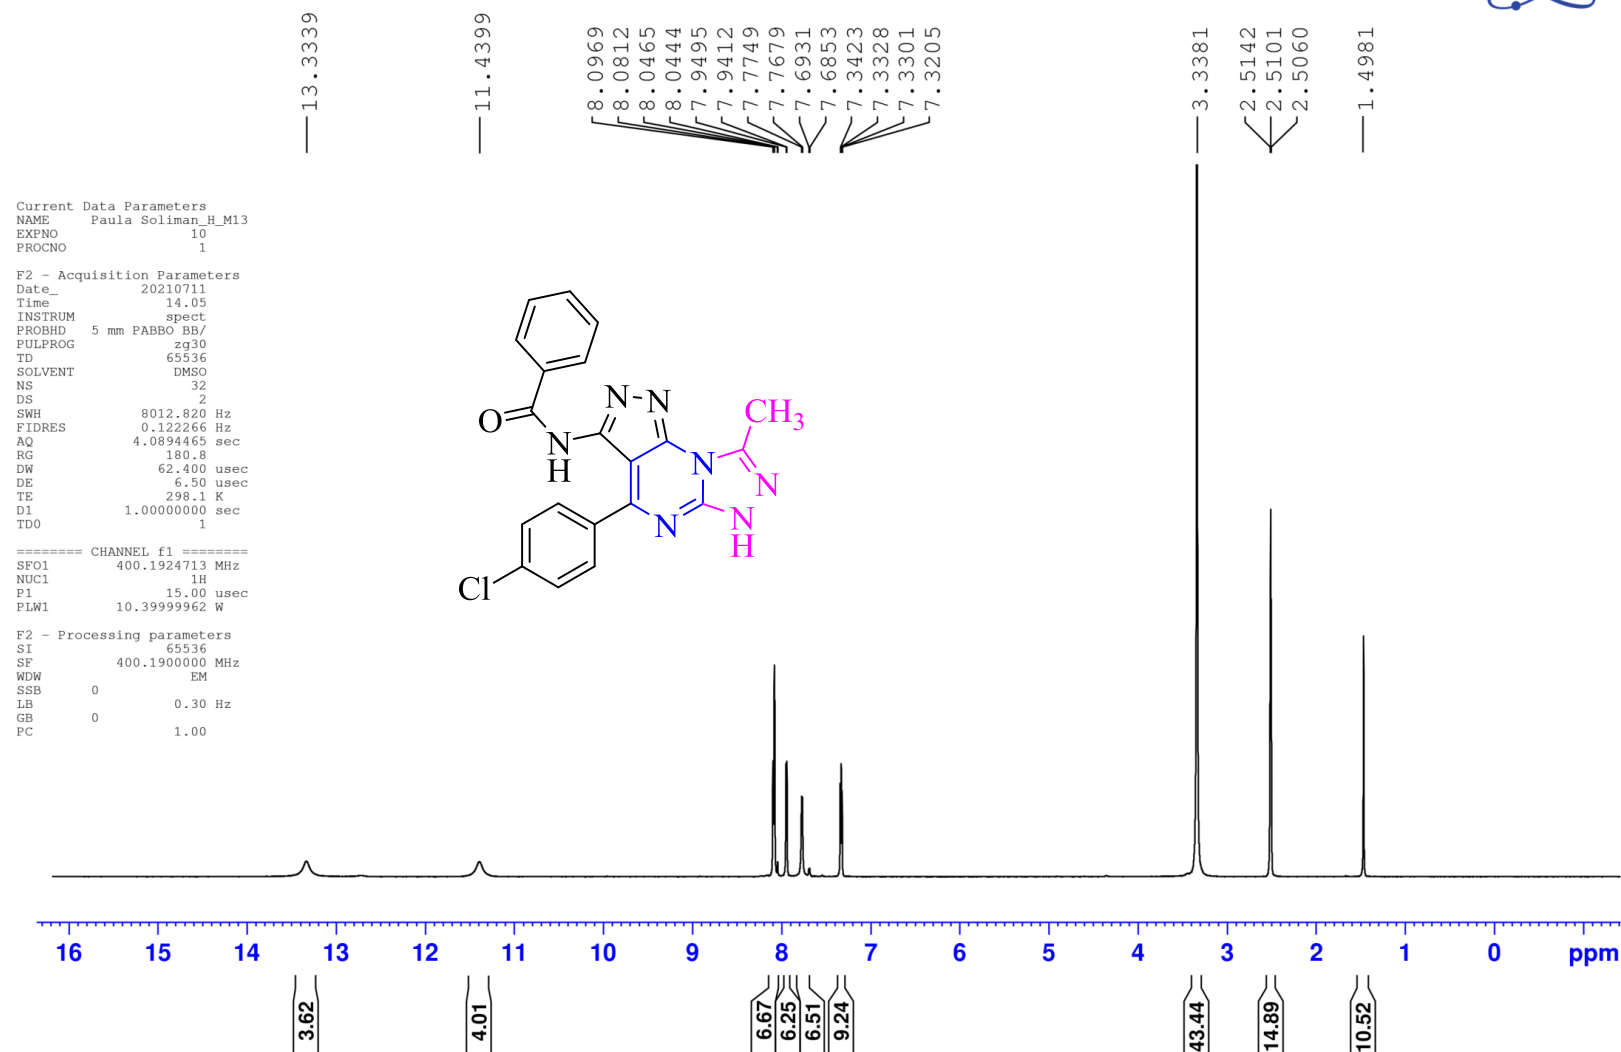

**<sup>1</sup>H-NMR of N-(4-(4-chlorophenyl)-8-methyl-6H-pyrazolo[4,3-e][1,2,4]triazolo[4,3-a]pyrimidin-3-yl)benzamide (9).**

Paula Soliman\_H\_M13\_D2O

Microanalytical Unit - FOPCU - NMR laboratory  
www.pharma.cu.edu.eg dir-mau.fopcu@pharma.cu.edu.eg

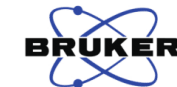

Current Data Parameters  
NAME Paula Soliman\_H\_M13\_D2O  
EXPNO 10  
PROCNO 1

F2 - Acquisition Parameters  
Date\_ 20210711  
Time 16.08  
INSTRUM spect  
PROBHD 5 mm PABBO BB/  
PULPROG zg30  
TD 65536  
SOLVENT DMSO  
NS 32  
DS 2  
SWH 8012.820 Hz  
FIDRES 0.122266 Hz  
AQ 4.0894465 sec  
RG 180.8  
DW 62.400 usec  
DE 6.50 usec  
TE 298.0 K  
D1 1.0000000 sec  
TDO 1

----- CHANNEL f1 -----  
SFO1 400.1924713 MHz  
NUC1 1H  
P1 15.00 usec  
PLW1 10.39999962 W

F2 - Processing parameters  
SI 65536  
SF 400.1900000 MHz  
WDW EM  
SSB 0  
LB 0.30 Hz  
GB 0  
PC 1.00

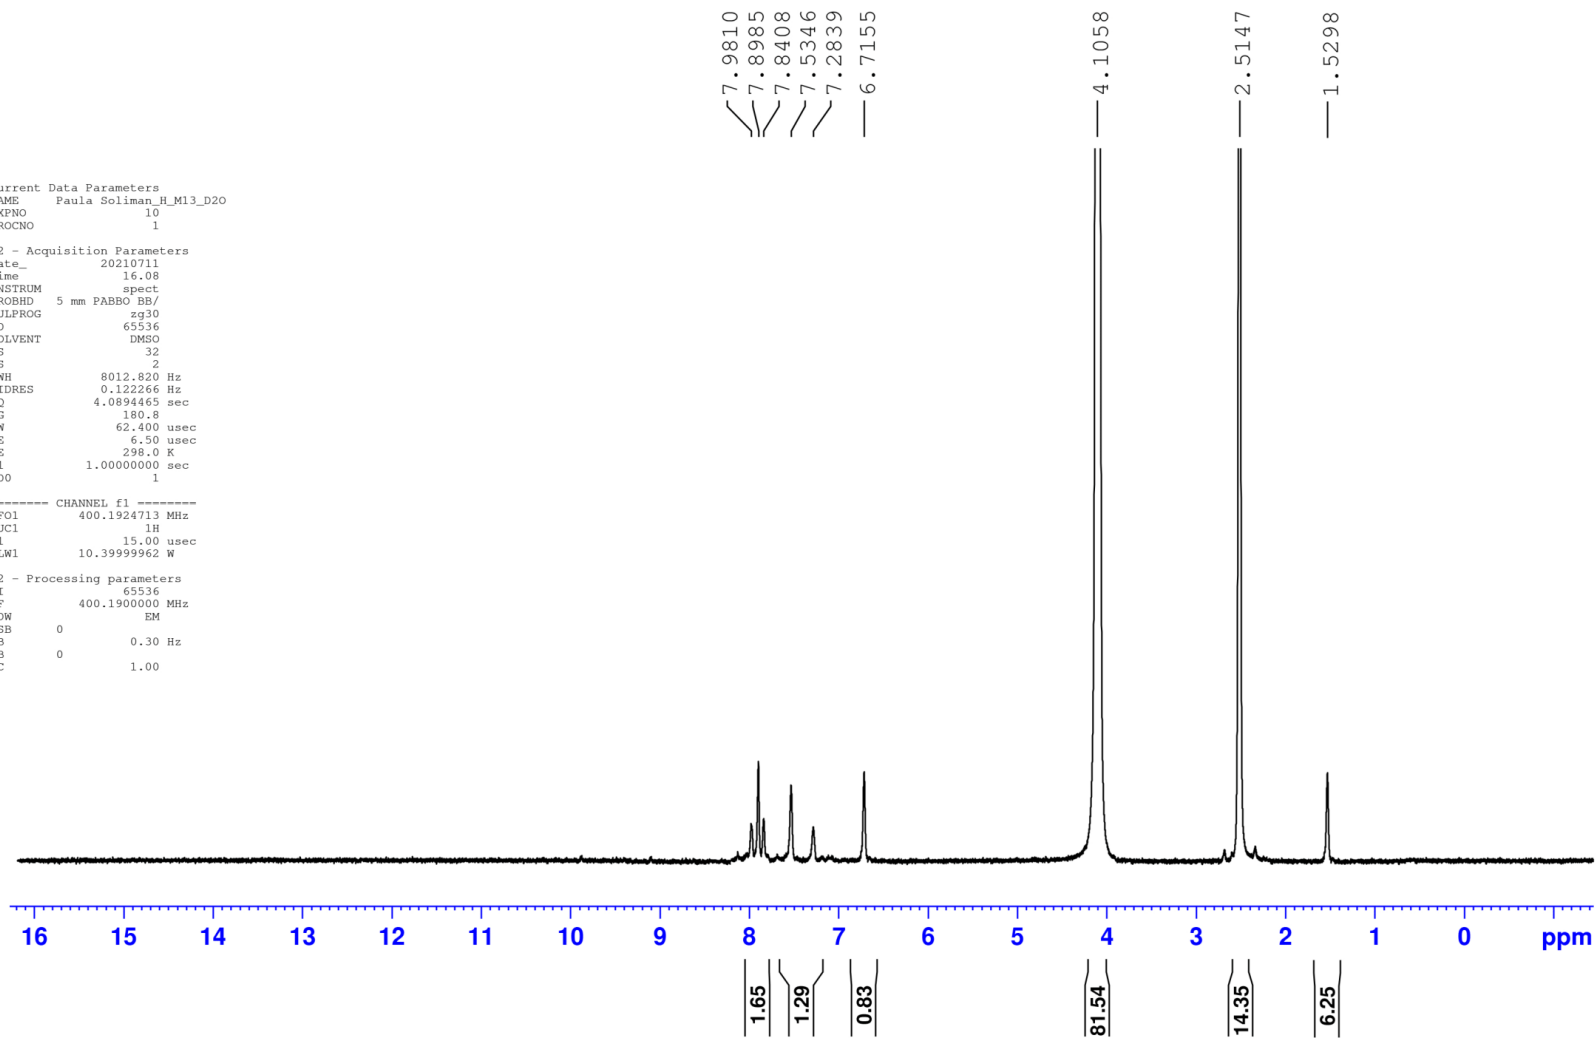

D<sub>2</sub>O of *N*-(4-(4-chlorophenyl)-8-methyl-6H-pyrazolo[4,3-e][1,2,4]triazolo[4,3-a]pyrimidin-3-yl)benzamide (9).

Paula Soliman\_C\_M13

Microanalytical Unit - FOPCU - NMR laboratory  
www.pharma.cu.edu.eg dir-mau.fopcu@pharma.cu.edu.eg

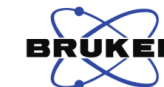

167.95 159.46 148.49 141.22 137.88 136.99 134.88 128.94 125.48 118.26 116.20 113.03 40.62 40.41 40.20 39.99 39.79 39.58 39.37 22.64

Current Data Parameters  
NAME Paula Soliman\_C\_M13  
EXPNO 10  
PROCNO 1

F2 - Acquisition Parameters  
Date\_ 20210711  
Time 15.15  
INSTRUM spect  
PROBHD 5 mm PABBO BB/  
PULPROG zgpg30  
TD 65536  
SOLVENT DMSO  
NS 1200  
DS 4  
SWH 24038.461 Hz  
FIDRES 0.366798 Hz  
AQ 1.3631488 sec  
RG 202.37  
DW 20.800 usec  
DE 6.50 usec  
TE 298.1 K  
D1 2.00000000 sec  
D11 0.03000000 sec  
TD0 1

==== CHANNEL f1 =====  
SFO1 100.6379178 MHz  
NUC1 13C  
P1 10.00 usec  
PLW1 45.00000000 W  
  
==== CHANNEL f2 =====  
SFO2 400.1916008 MHz  
NUC2 1H  
CPDPRG[2] waltz16

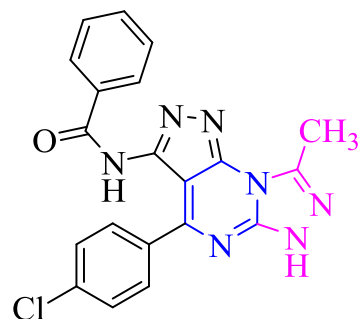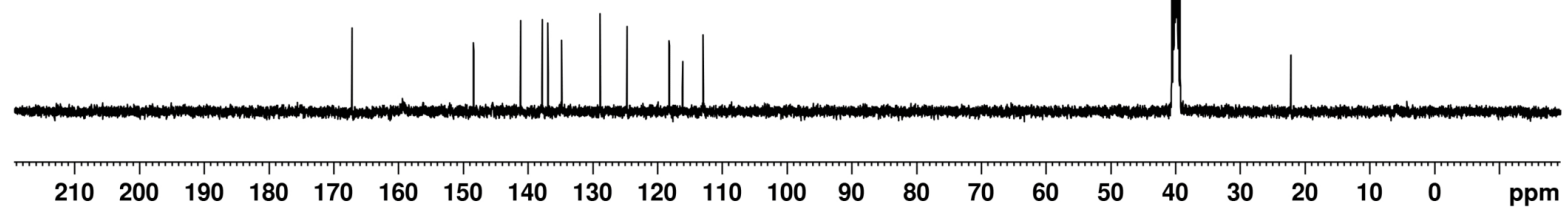

**<sup>13</sup>C-NMR of *N*-(4-(4-chlorophenyl)-8-methyl-6H-pyrazolo[4,3-*e*][1,2,4]triazolo[4,3-*a*]pyrimidin-3-yl)benzamide (9).**



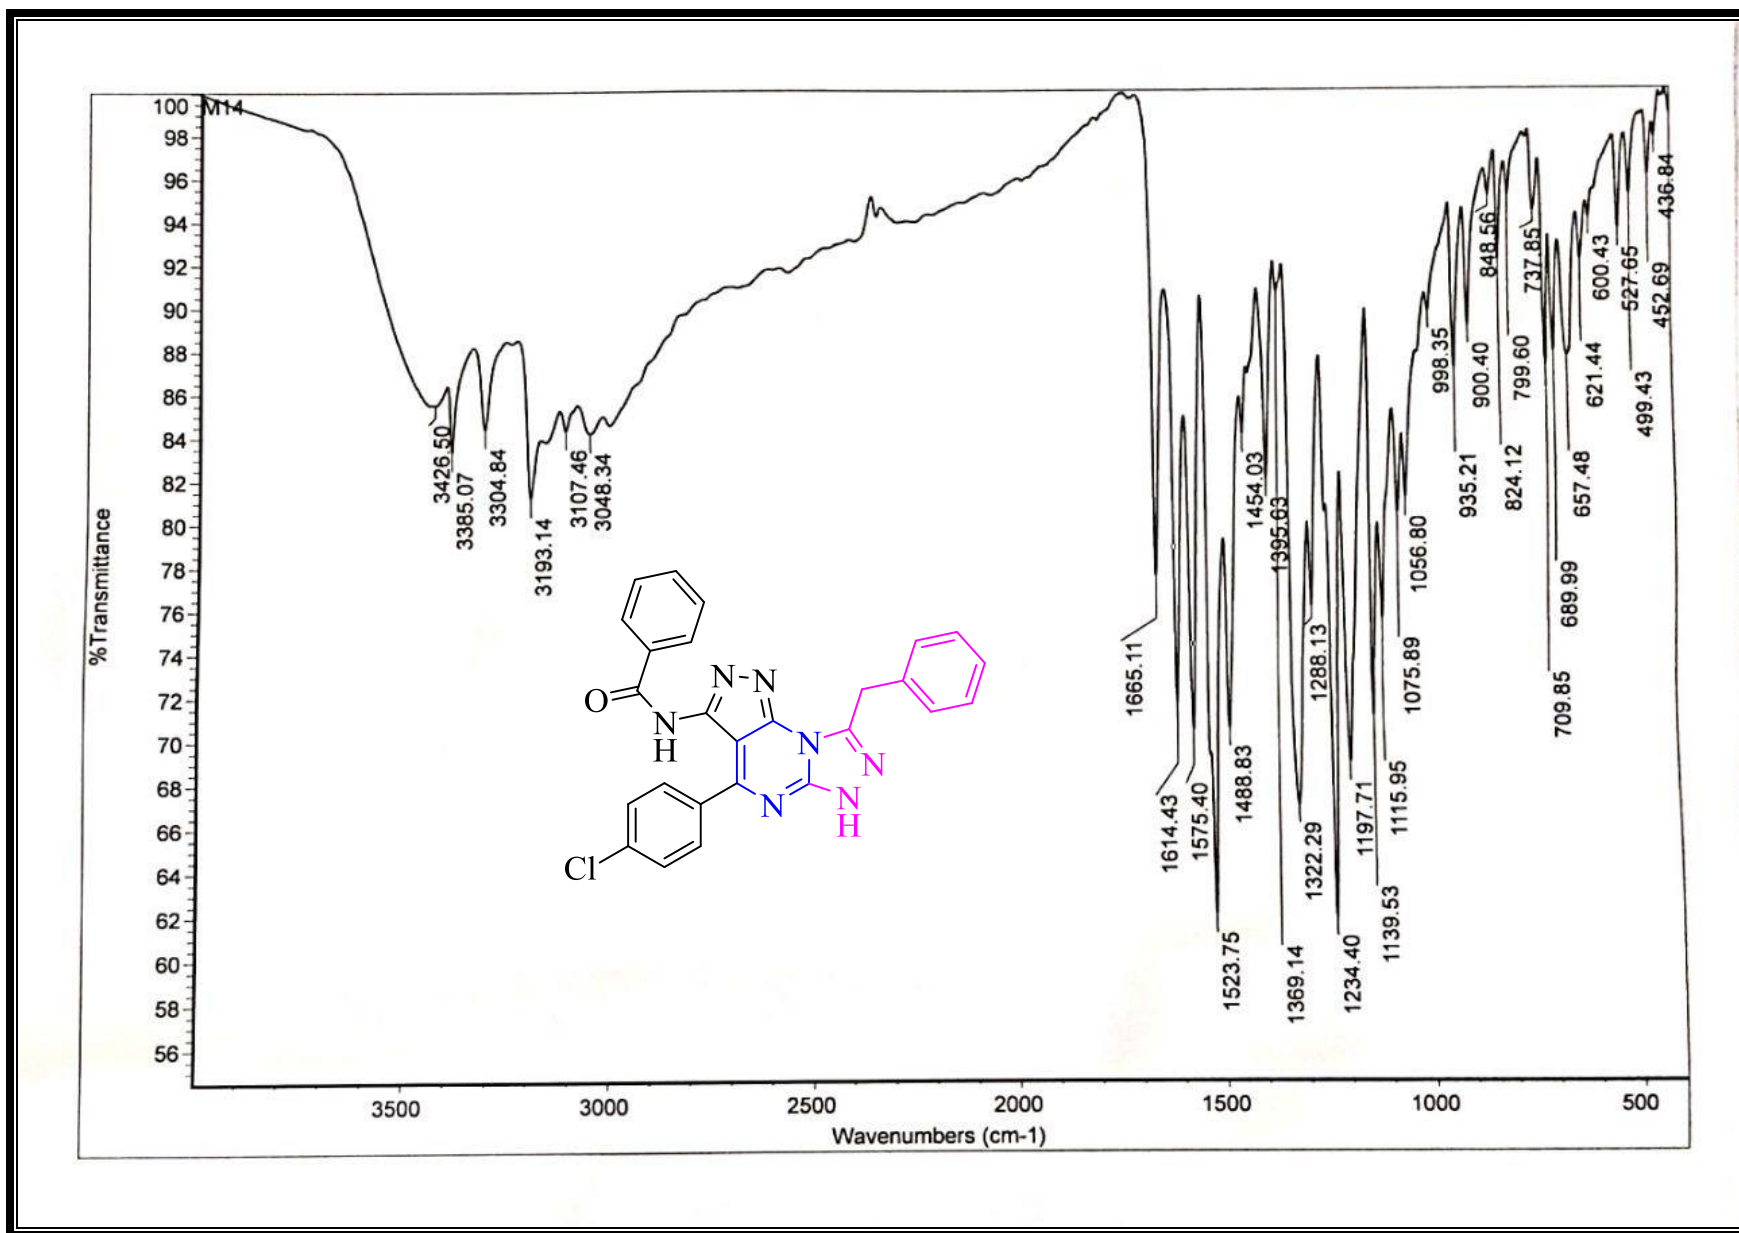

IR of *N*-(4-(4-chlorophenyl)-8-phenyl-6H-pyrazolo[4,3-*e*][1,2,4]triazolo[4,3-*a*]pyrimidin-3-yl)benzamide (10).

Paula Soliman\_H\_M14

Microanalytical Unit - FOPCU - NMR laboratory  
www.pharma.cu.edu.eg dir-mau.fopcu@pharma.cu.edu.eg

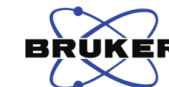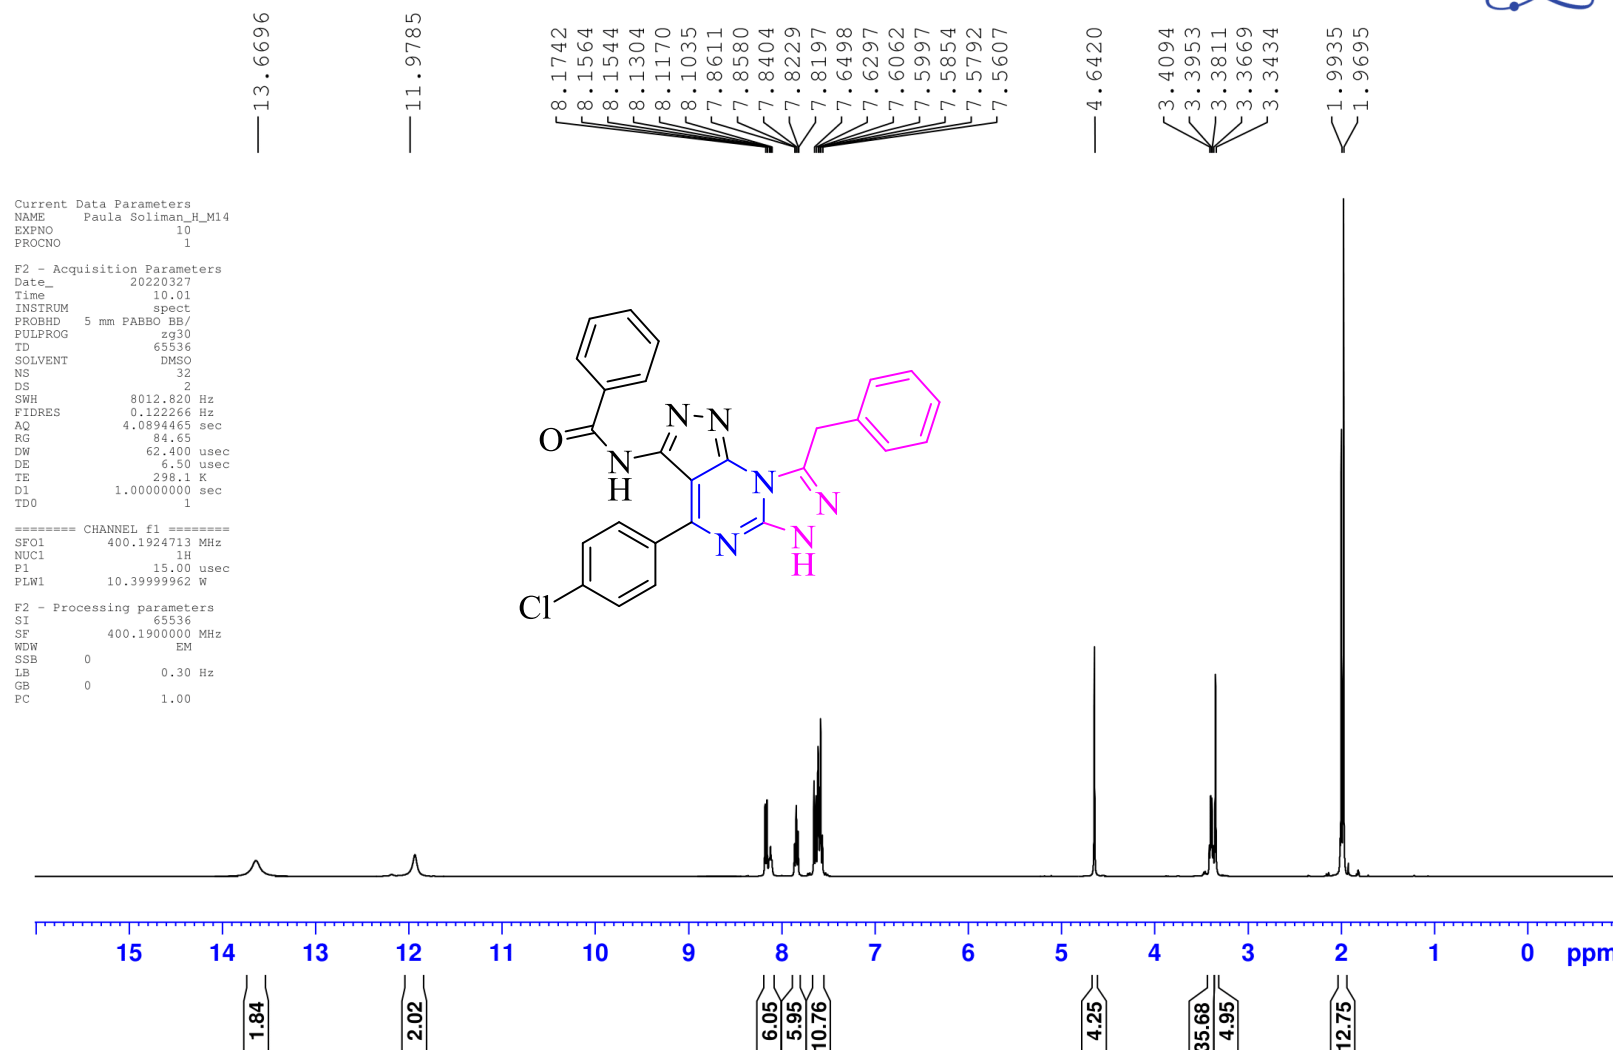

<sup>1</sup>H-NMR of *N*-(4-(4-chlorophenyl)-8-phenyl-6H-pyrazolo[4,3-*e*][1,2,4]triazolo[4,3-*a*]pyrimidin-3-yl)benzamide (10).

Paula Soliman\_H\_M14\_D2O

Microanalytical Unit - FOPCU - NMR laboratory  
www.pharma.cu.edu.eg dir-mau.fopcu@pharma.cu.edu.eg

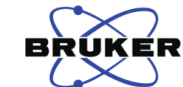

8.1254  
8.1060  
7.8261  
7.8080  
7.7899  
7.6121  
7.5919  
7.5678  
7.5487  
7.5300  
7.5031  
7.4963  
7.4897  
4.5821  
3.8341  
3.3804  
3.3684  
3.3569  
1.9478  
1.9132

Current Data Parameters  
NAME Paula Soliman\_H\_M14\_D2O  
EXPNO 10  
PROCNO 1

F2 - Acquisition Parameters  
Date\_ 20220327  
Time 12.49  
INSTRUM spect  
PROBHD 5 mm PABBO BB/  
PULPROG zg30  
TD 65536  
SOLVENT DMSO  
NS 32  
DS 2  
SWH 8012.820 Hz  
FIDRES 0.122266 Hz  
AQ 4.0884465 sec  
RG 84.65  
DW 62.400 usec  
DE 6.50 usec  
TE 298.1 K  
D1 1.00000000 sec  
TD0 1

===== CHANNEL f1 =====  
SF01 400.1924713 MHz  
NUC1 1H  
P1 15.00 usec  
PLW1 10.39999962 W

F2 - Processing parameters  
SI 65536  
SF 400.1900000 MHz  
WDW EM  
SSB 0  
LB 0.30 Hz  
GB 0  
PC 1.00

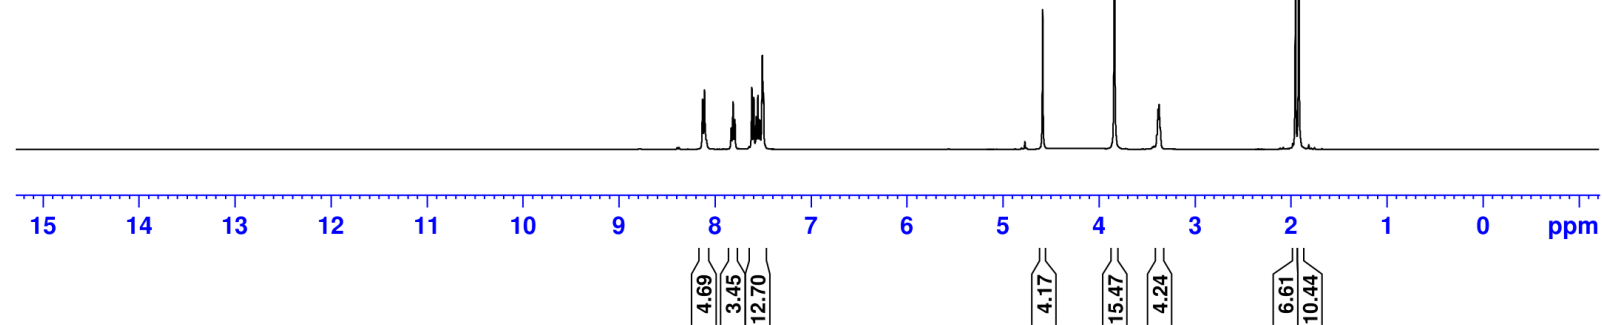

D<sub>2</sub>O of *N*-(4-(4-chlorophenyl)-8-phenyl-6H-pyrazolo[4,3-*e*][1,2,4]triazolo[4,3-*a*]pyrimidin-3-yl)benzamide (10).

Paula Soliman\_C\_M14

Microanalytical Unit - FOPCU - NMR laboratory  
www.pharma.cu.edu.eg dir-mau.fopcu@pharma.cu.edu.eg

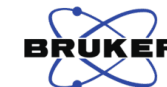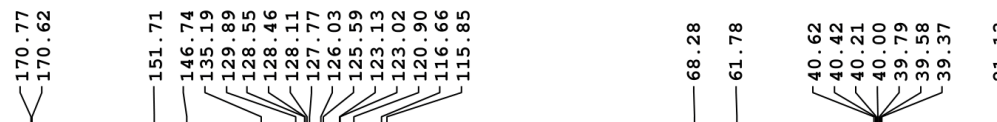

Current Data Parameters  
NAME Paula Soliman\_C\_M14  
EXPNO 10  
PROCNO 1

F2 - Acquisition Parameters  
Date\_ 20220327  
Time 6.28  
INSTRUM spect  
PROBHD 5 mm PABBO BB/  
PULPROG zgpg30  
TD 65536  
SOLVENT DMSO  
NS 1500  
DS 4  
SWH 24038.461 Hz  
FIDRES 0.366798 Hz  
AQ 1.3631488 sec  
RG 202.37  
DW 20.800 usec  
DE 6.50 usec  
TE 298.1 K  
D1 2.00000000 sec  
D11 0.03000000 sec  
TD0 1

===== CHANNEL f1 =====  
SFO1 100.6379178 MHz  
NUC1 13C  
P1 10.00 usec  
PLW1 45.00000000 W  
  
===== CHANNEL f2 =====  
SFO2 400.1916008 MHz  
NUC2 1H  
CPDPRG[2] waltz16

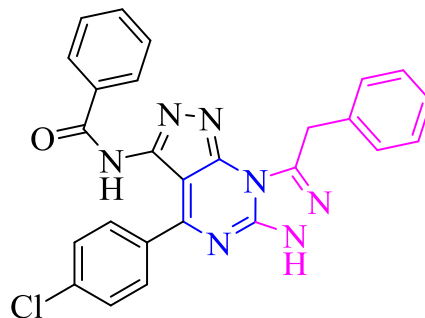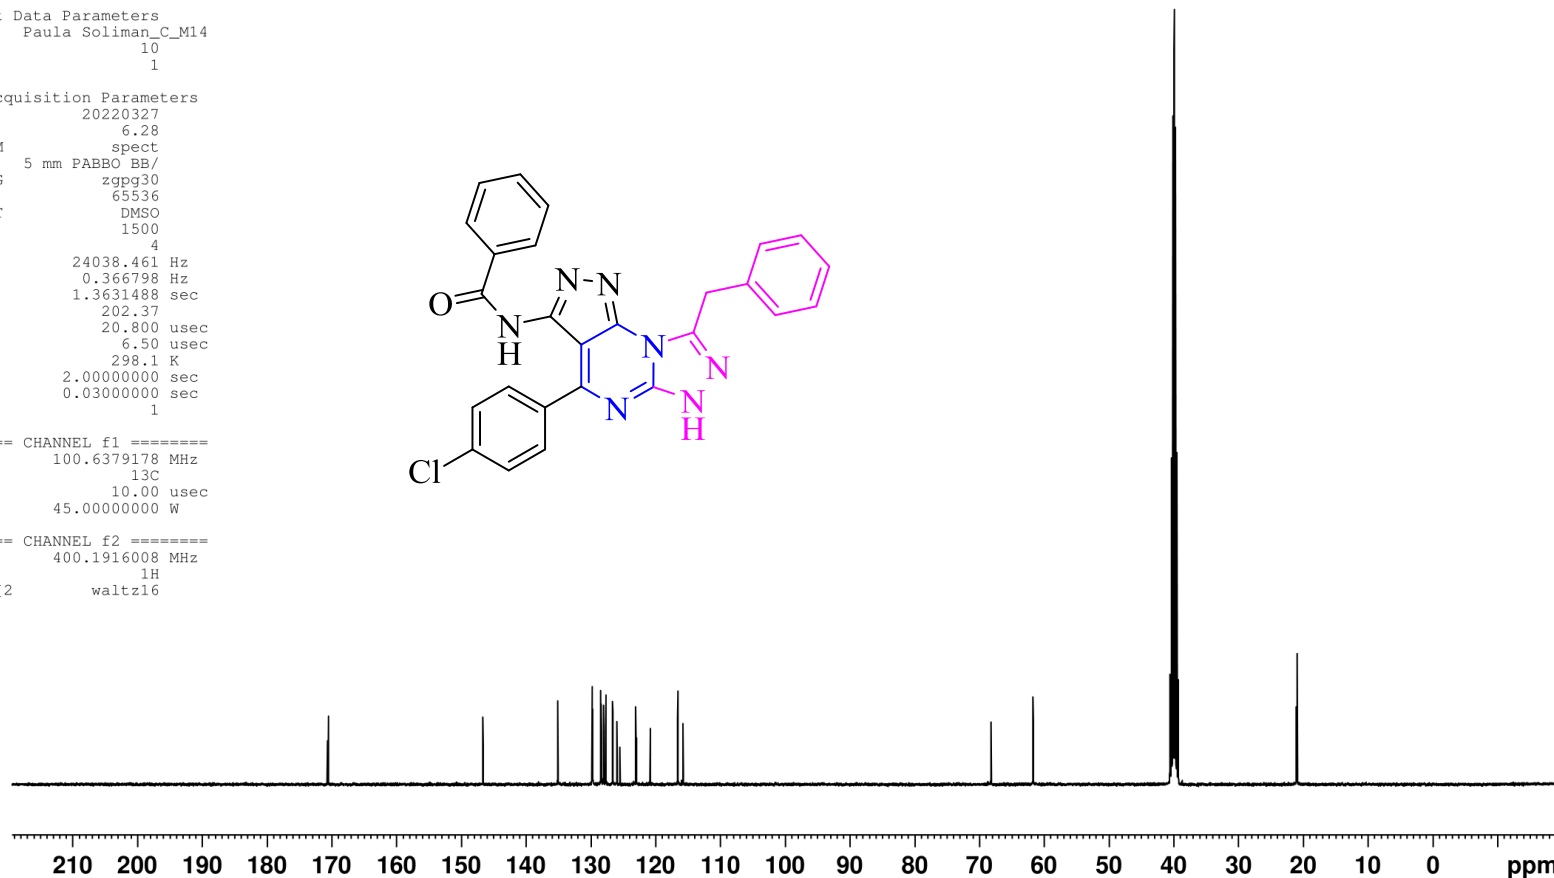

<sup>13</sup>C-NMR of N-(4-(4-chlorophenyl)-8-phenyl-6H-pyrazolo[4,3-e][1,2,4]triazolo[4,3-a]pyrimidin-3-yl)benzamide (10).

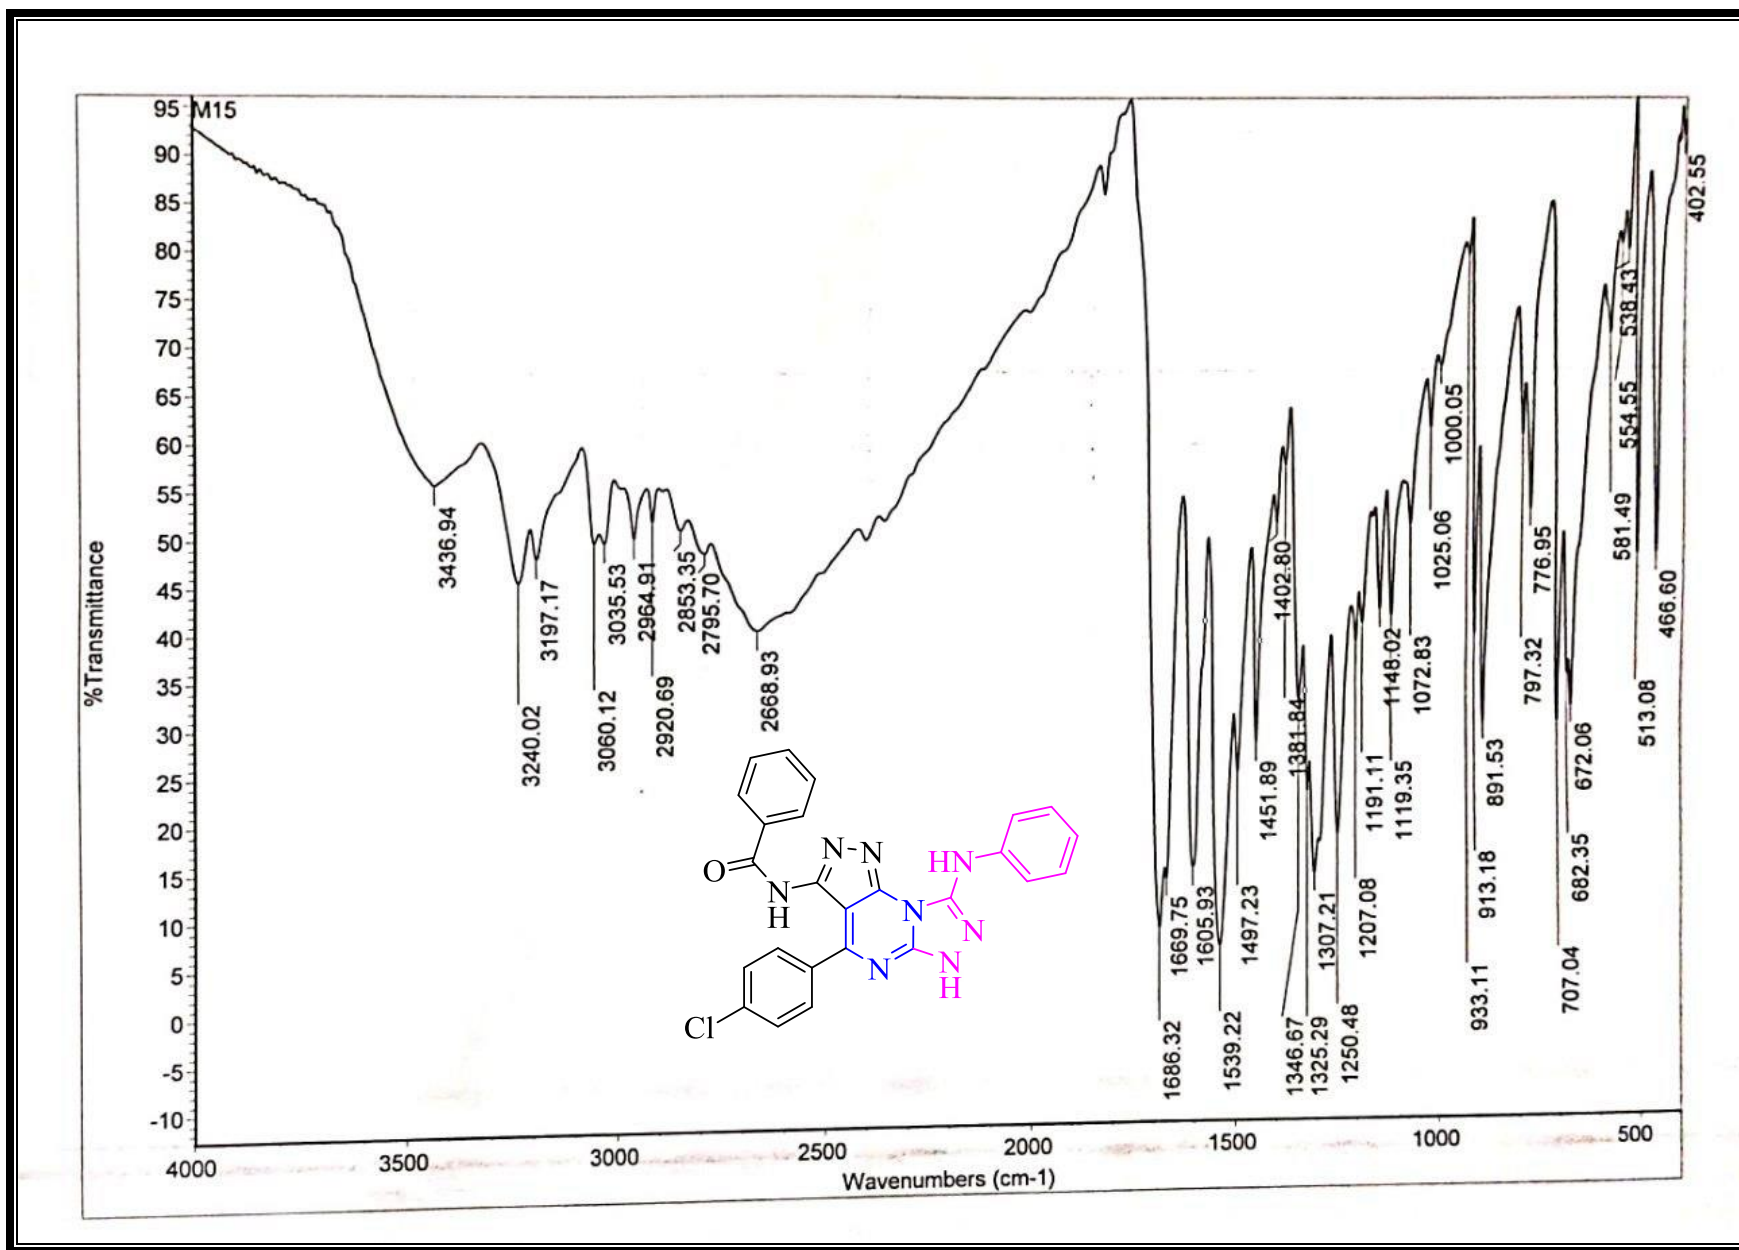

IR of *N*-(4-(4-chlorophenyl)-8-(phenylamino)-6H-pyrazolo[4,3-*e*][1,2,4]triazolo[4,3-*a*]pyrimidin-3-yl)benzamide (12).

Paula Soliman\_H\_M15

Microanalytical Unit - FOPCU - NMR laboratory  
www.pharma.cu.edu.eg dir-mau.fopcu@pharma.cu.edu.eg

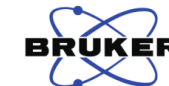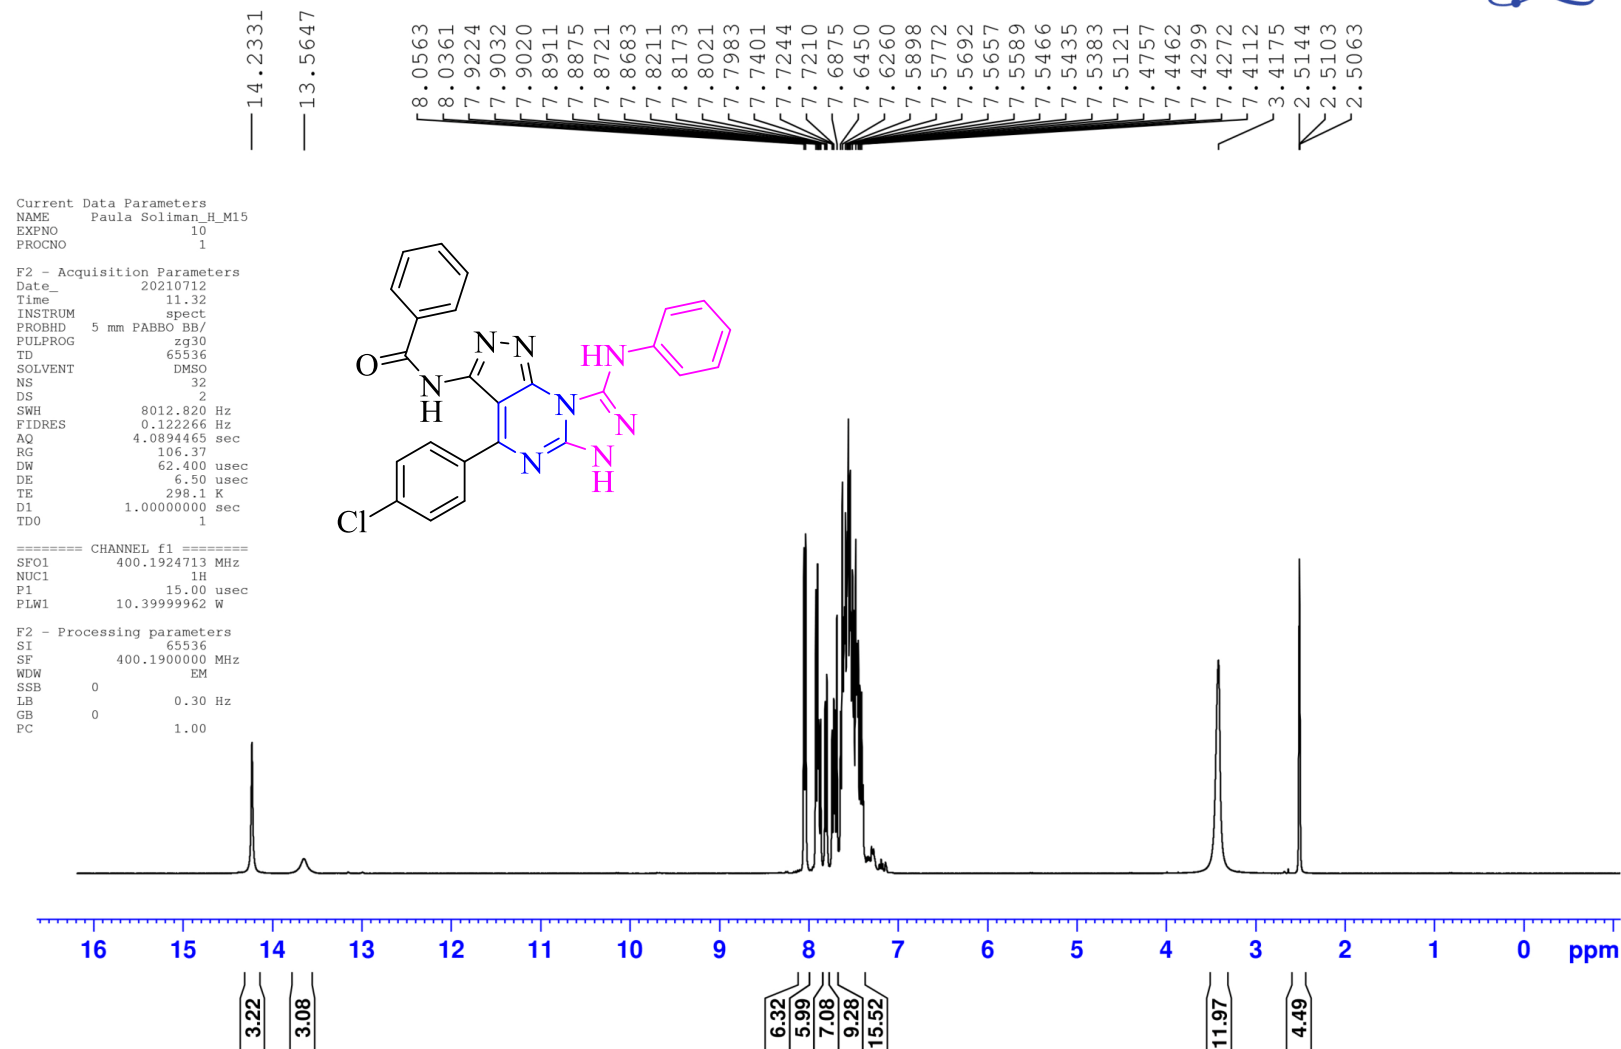

<sup>1</sup>H-NMR of *N*-(4-(4-chlorophenyl)-8-(phenylamino)-6H-pyrazolo[4,3-*e*][1,2,4]triazolo[4,3-*a*]pyrimidin-3-yl)benzamide (12).

Paula Soliman\_H\_M15\_D2O

Microanalytical Unit - FOPCU - NMR laboratory  
www.pharma.cu.edu.eg dir-mau.fopcu@pharma.cu.edu.eg

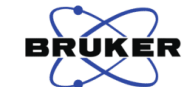

Current Data Parameters  
NAME Paula Soliman\_H\_M15\_D2O  
EXPNO 10  
PROCNO 1

F2 - Acquisition Parameters  
Date\_ 20210712  
Time 12.46  
INSTRUM spect  
PROBHD 5 mm PABBO BB/  
PULPROG zg30  
TD 65536  
SOLVENT DMSO  
NS 32  
DS 2  
SWH 8012.820 Hz  
FIDRES 0.122266 Hz  
AQ 4.0894465 sec  
RG 114.95  
DW 62.400 usec  
DE 6.50 usec  
TE 298.0 K  
D1 1.0000000 sec  
TD0 1

----- CHANNEL f1 -----  
SFO1 400.1924713 MHz  
NUC1 1H  
P1 15.00 usec  
PLW1 10.39999962 W

F2 - Processing parameters  
SI 65536  
SF 400.1900000 MHz  
WDW EM  
SSB 0  
LB 0.30 Hz  
GB 0  
PC 1.00

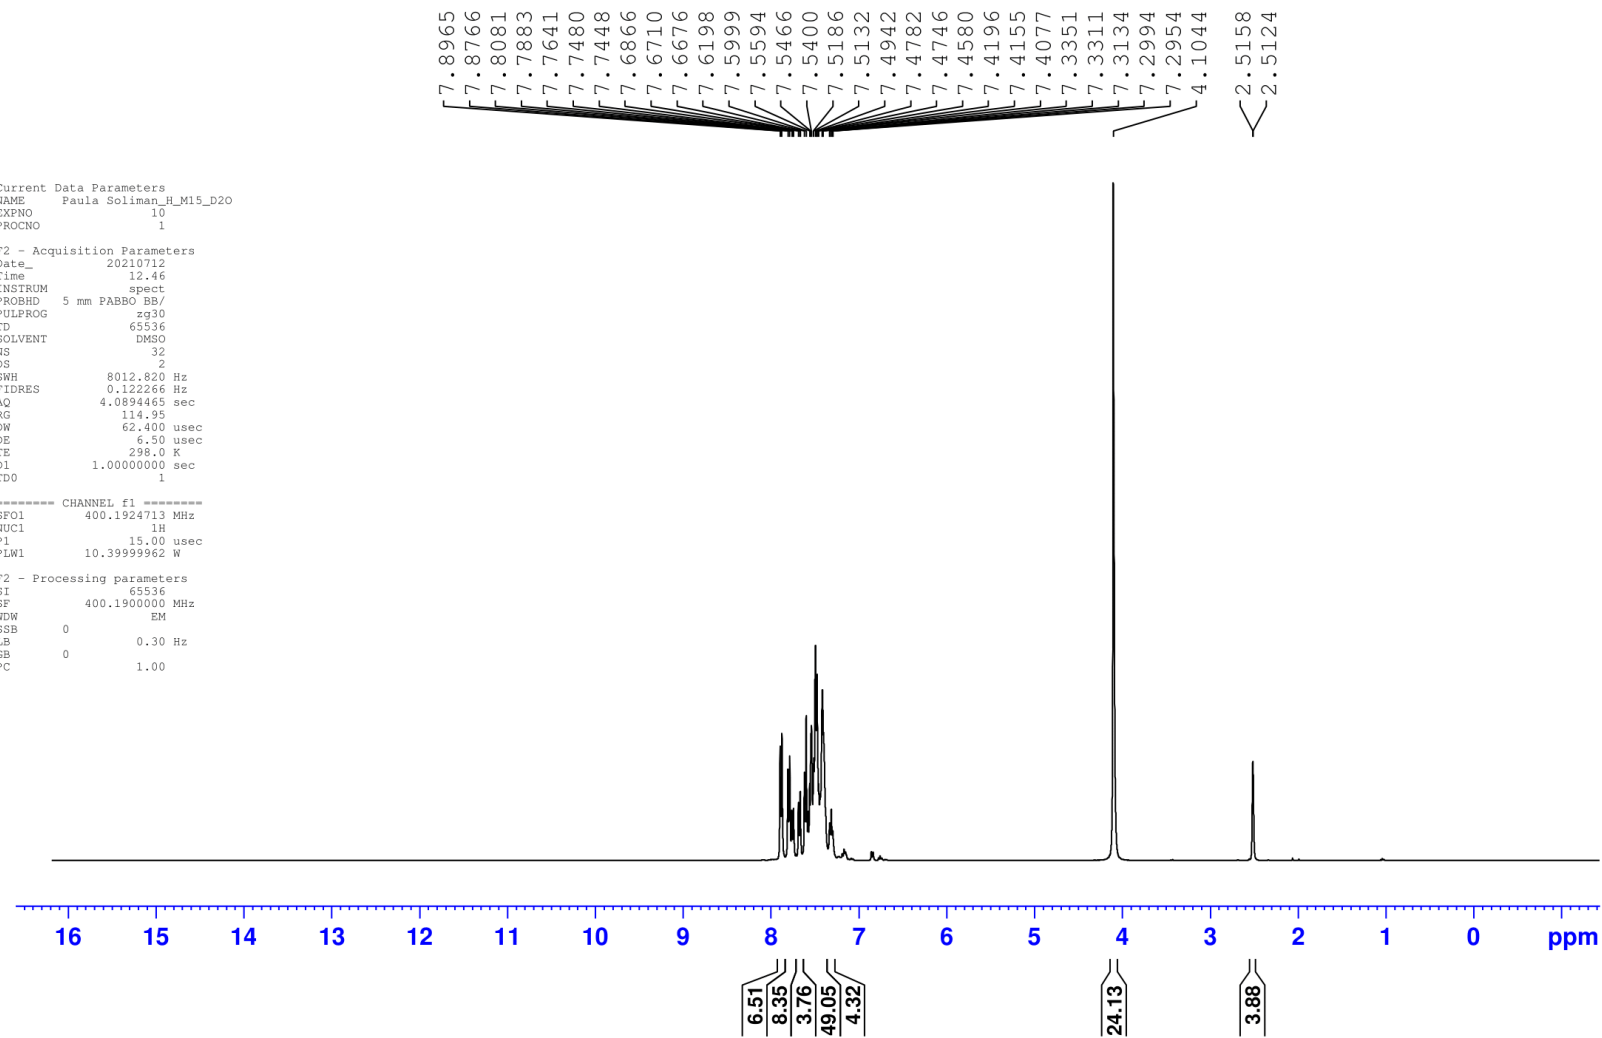

D<sub>2</sub>O of *N*-(4-(4-chlorophenyl)-8-(phenylamino)-6H-pyrazolo[4,3-*e*][1,2,4]triazolo[4,3-*a*]pyrimidin-3-yl)benzamide (12).

Paula Soliman\_C\_M15

Microanalytical Unit - FOPCU - NMR laboratory  
www.pharma.cu.edu.eg dir-mau.fopcu@pharma.cu.edu.eg

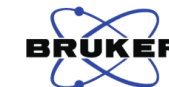

173.87  
166.40  
166.36  
163.29  
151.51  
148.15  
139.00  
138.10  
136.45  
133.93  
133.12  
132.68  
132.14  
131.61  
131.08  
130.94  
130.44  
130.44  
129.39  
129.21  
128.36  
128.11  
127.82  
125.54  
124.27

40.62  
40.42  
40.21  
40.00  
39.79  
39.58  
39.37

Current Data Parameters  
NAME Paula Soliman\_C\_M15  
EXPNO 10  
PROCNO 1

F2 - Acquisition Parameters  
Date\_ 20210712  
Time 12.25  
INSTRUM spect  
PROBHD 5 mm PABBO BB/  
PULPROG zgpg30  
TD 65536  
SOLVENT DMSO  
NS 1200  
DS 4  
SWH 24038.461 Hz  
FIDRES 0.366798 Hz  
AQ 1.3631488 sec  
RG 202.37  
DW 20.800 usec  
DE 6.50 usec  
TE 298.1 K  
D1 2.00000000 sec  
D11 0.03000000 sec  
TD0 1

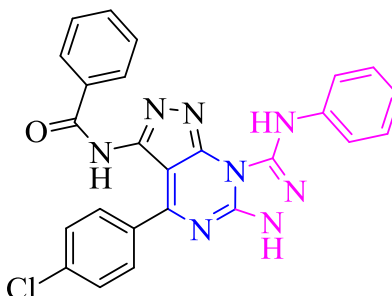

==== CHANNEL f1 =====  
SFO1 100.6379178 MHz  
NUC1 13C  
P1 10.00 usec  
PLW1 45.00000000 W  
  
==== CHANNEL f2 =====  
SFO2 400.1916008 MHz  
NUC2 1H  
CPDPRG[2] waltz16

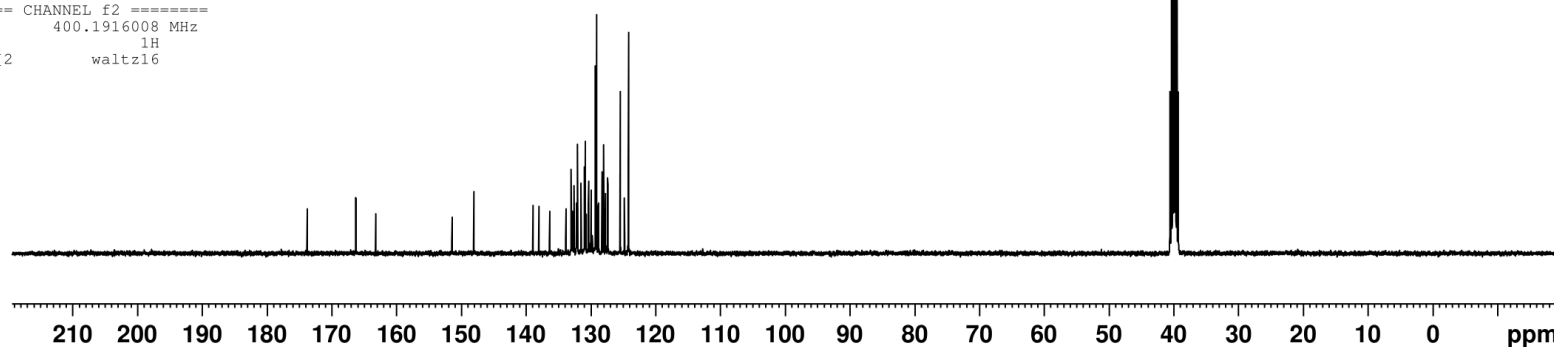

<sup>13</sup>C-NMR of *N*-(4-(4-chlorophenyl)-8-(phenylamino)-6H-pyrazolo[4,3-*e*][1,2,4]triazolo[4,3-*a*]pyrimidin-3-yl)benzamide (12).



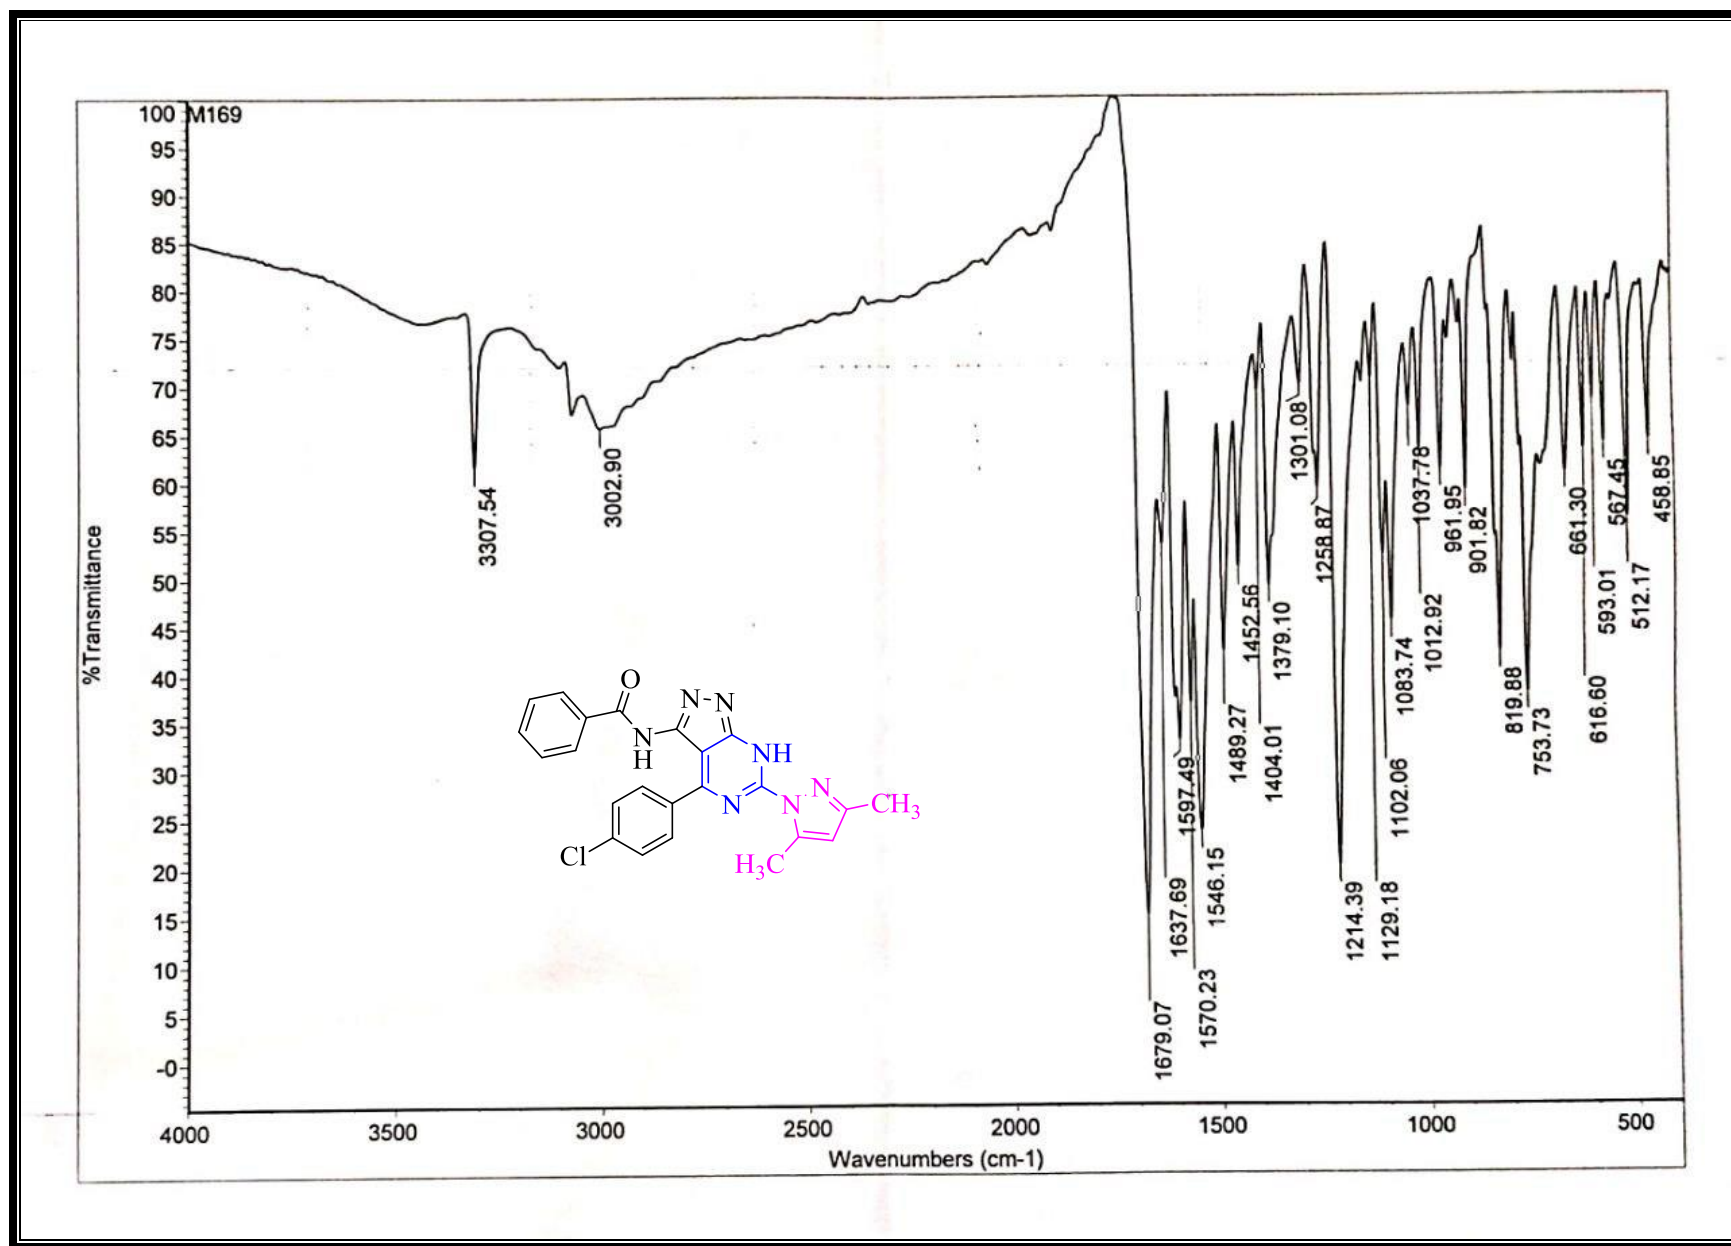

IR of *N*-(4-(4-chlorophenyl)-6-(3,5-dimethyl-1H-pyrazol-1-yl)-7H-pyrazolo[3,4-d]pyrimidin-3-yl)benzamide (13a).

Paula Soliman\_H\_M16a

Microanalytical Unit - FOPCU - NMR laboratory  
www.pharma.cu.edu.eg dir-mau.fopcu@pharma.cu.edu.eg

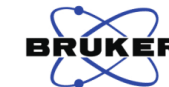

Current Data Parameters  
NAME Paula Soliman\_H\_M16a  
EXPNO 10  
PROCNO 1

F2 - Acquisition Parameters  
Date\_ 20210712  
Time 19.50  
INSTRUM spect  
PROBHD 5 mm PABBO BB/  
PULPROG zg30  
TD 65536  
SOLVENT DMSO  
NS 32  
DS 2  
SWH 8012.820 Hz  
FIDRES 0.122266 Hz  
AQ 4.0894465 sec  
RG 169.46  
DW 62.400 usec  
DE 6.50 usec  
TE 298.0 K  
D1 1.0000000 sec  
TD0 1

===== CHANNEL f1 =====  
SFO1 400.1924713 MHz  
NUC1 1H  
P1 15.00 usec  
PLW1 10.39999962 W

F2 - Processing parameters  
SI 65536  
SF 400.1900000 MHz  
WDW EM  
SSB 0  
LB 0.30 Hz  
GB 0  
PC 1.00

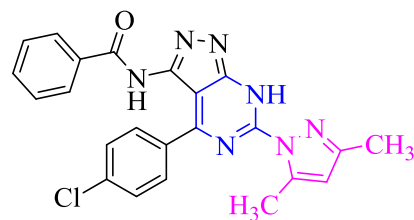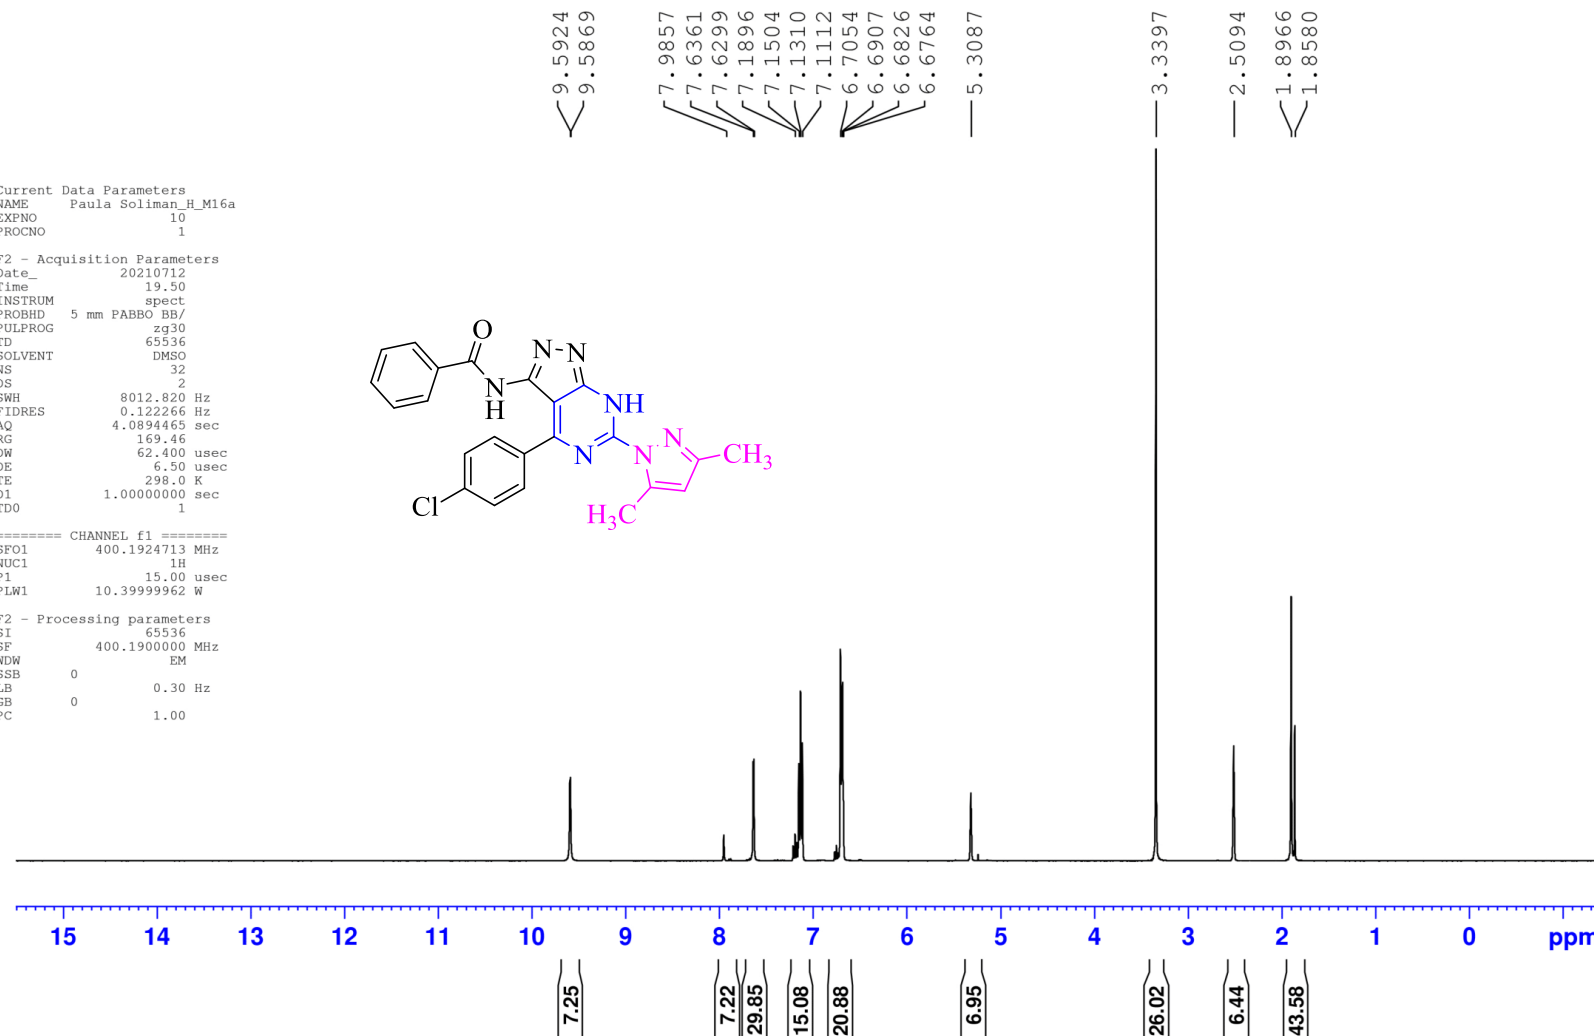

<sup>1</sup>H-NMR of *N*-(4-(4-chlorophenyl)-6-(3,5-dimethyl-1H-pyrazol-1-yl)-7H-pyrazolo[3,4-d]pyrimidin-3-yl)benzamide (13a).

Paula Soliman\_H\_M16a\_D2O

Microanalytical Unit - FOPCU - NMR laboratory  
www.pharma.cu.edu.eg dir-mau.fopcu@pharma.cu.edu.eg

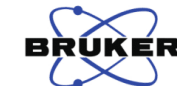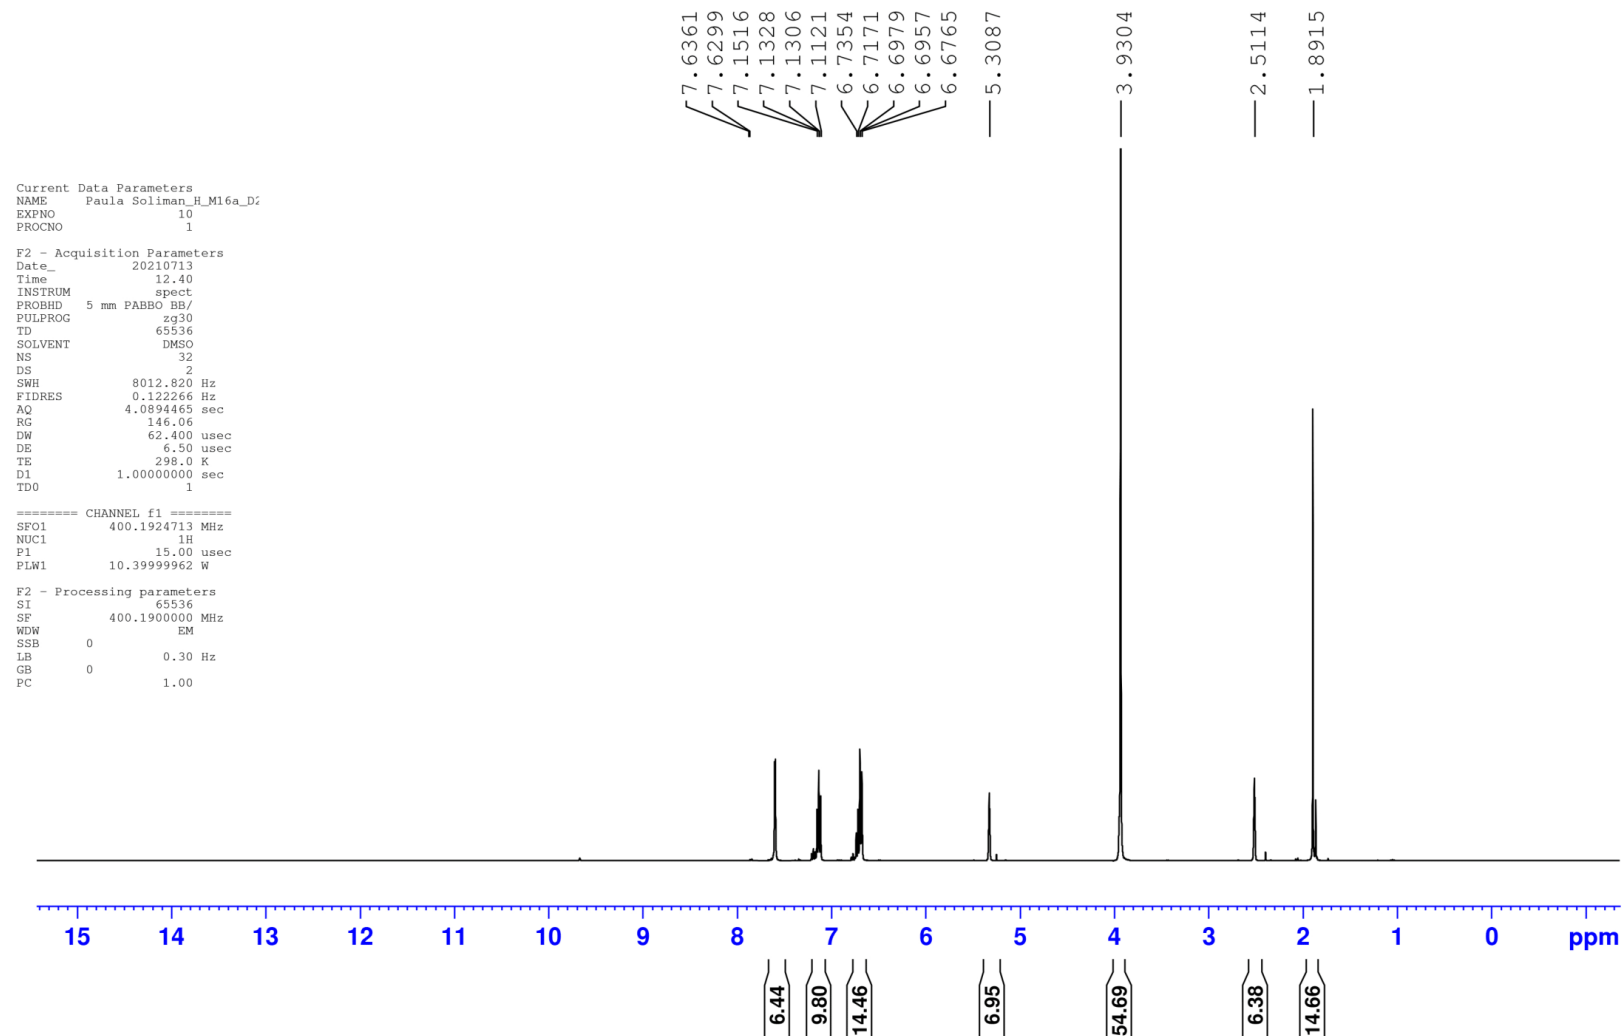

D<sub>2</sub>O of *N*-(4-(4-chlorophenyl)-6-(3,5-dimethyl-1H-pyrazol-1-yl)-7H-pyrazolo[3,4-d]pyrimidin-3-yl)benzamide (13a).

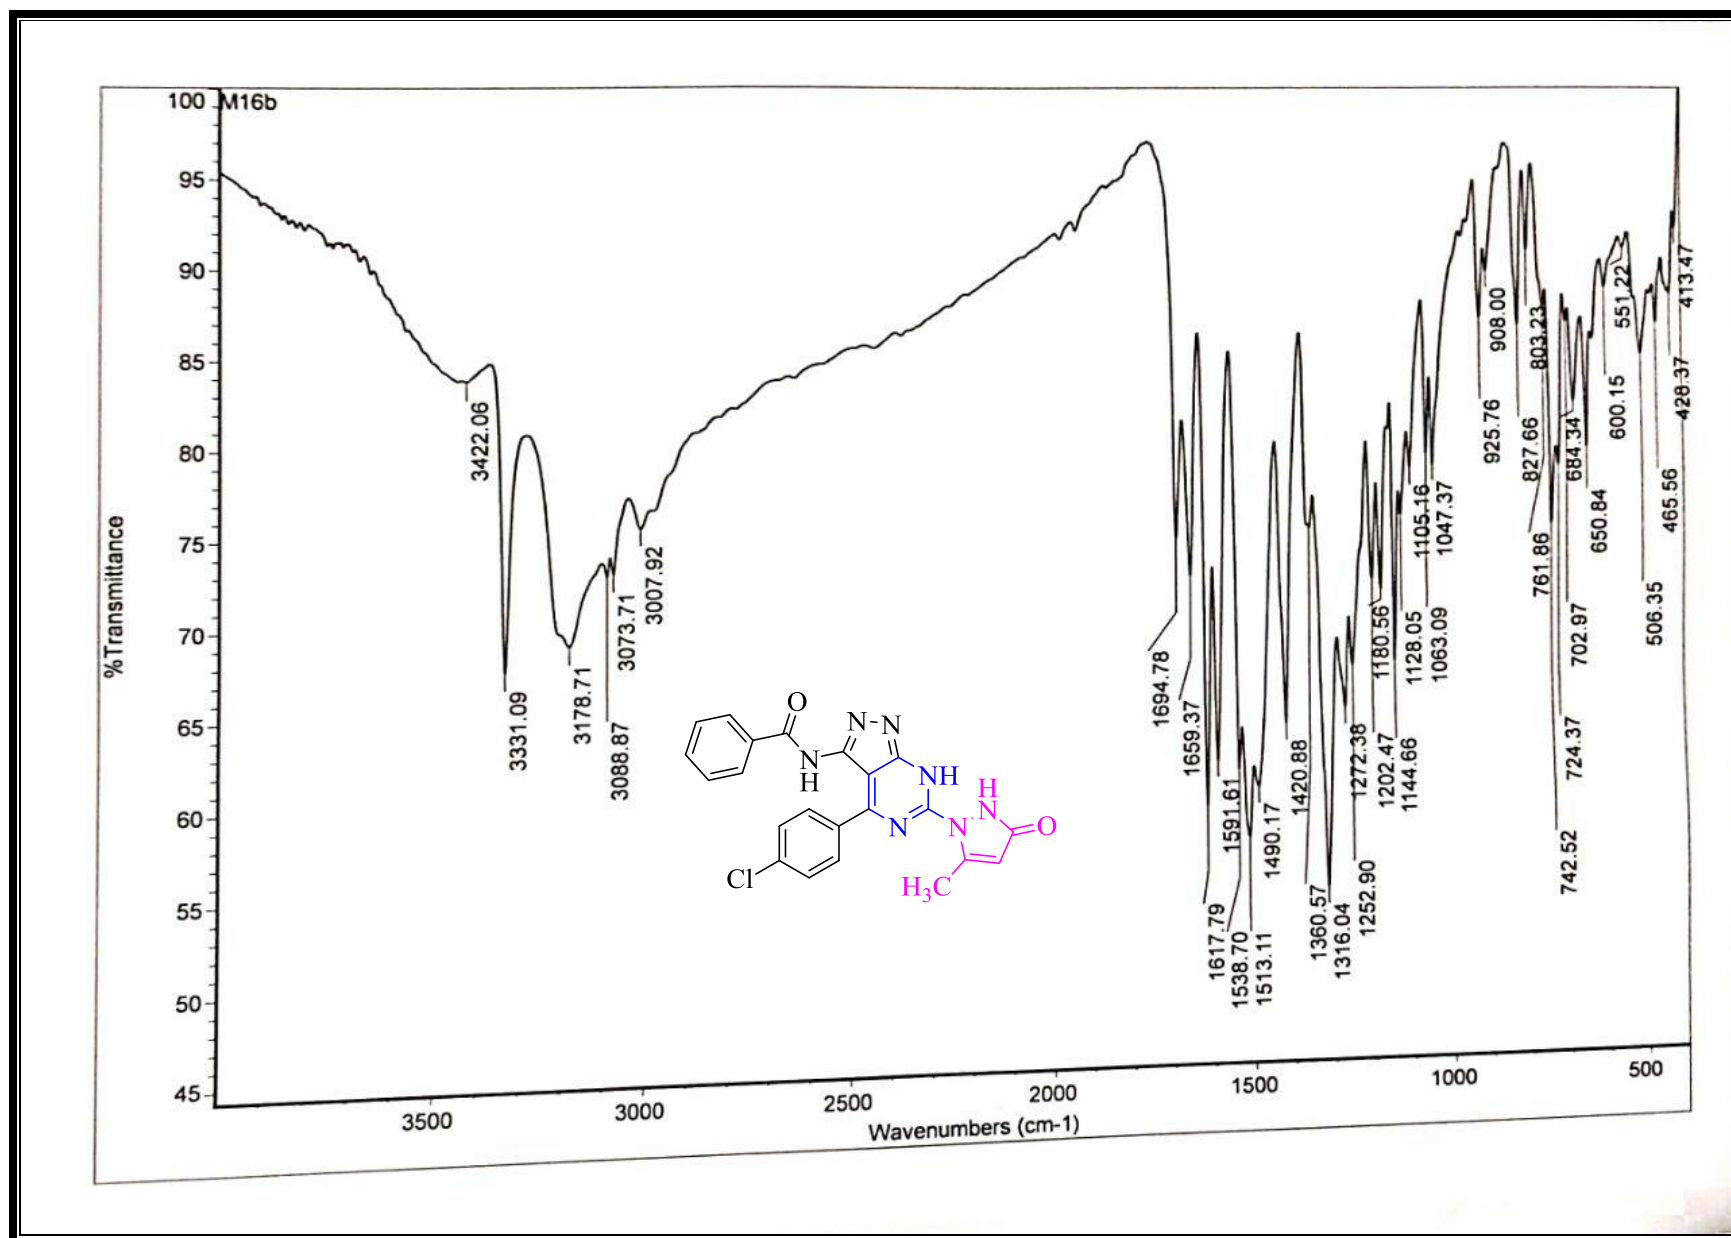

IR of *N*-(4-(4-chlorophenyl)-6-(5-methyl-3-oxo-2,3-dihydro-1H-pyrazol-1-yl)-7H-pyrazolo[3,4-*d*]pyrimidin-3-yl)benzamide (13b).

Paula Soliman\_H\_M16b

Microanalytical Unit - FOPCU - NMR laboratory  
www.pharma.cu.edu.eg dir-mau.fopcu@pharma.cu.edu.eg

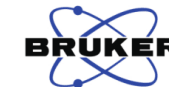

—12.4080  
—11.8513  
—11.2895  
8.0276  
8.0059  
8.0001  
7.9809  
7.7161  
7.6949  
7.6783  
7.6597  
7.5710  
7.5516  
7.5327  
—5.8325  
—3.3482  
—2.5087  
—2.1158

Current Data Parameters  
NAME Paula Soliman\_H\_M16b  
EXPNO 10  
PROCNO 1

F2 - Acquisition Parameters  
Date\_ 20210713  
Time 10.04  
INSTRUM spect  
PROBHD 5 mm PABBO BB/  
PULPROG zg30  
TD 65536  
SOLVENT DMSO  
NS 32  
DS 2  
SWH 8012.820 Hz  
FIDRES 0.122266 Hz  
AQ 4.0894465 sec  
RG 202.37  
DW 62.400 usec  
DE 6.50 usec  
TE 298.1 K  
D1 1.0000000 sec  
TD0 1

===== CHANNEL f1 =====  
SFO1 400.1924713 MHz  
NUC1 1H  
P1 15.00 usec  
PLW1 10.39999962 W

F2 - Processing parameters  
SI 65536  
SF 400.1900000 MHz  
WDW EM  
SSB 0  
LB 0.30 Hz  
GB 0  
PC 1.00

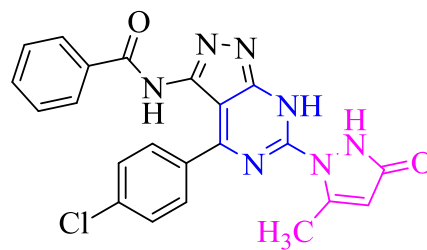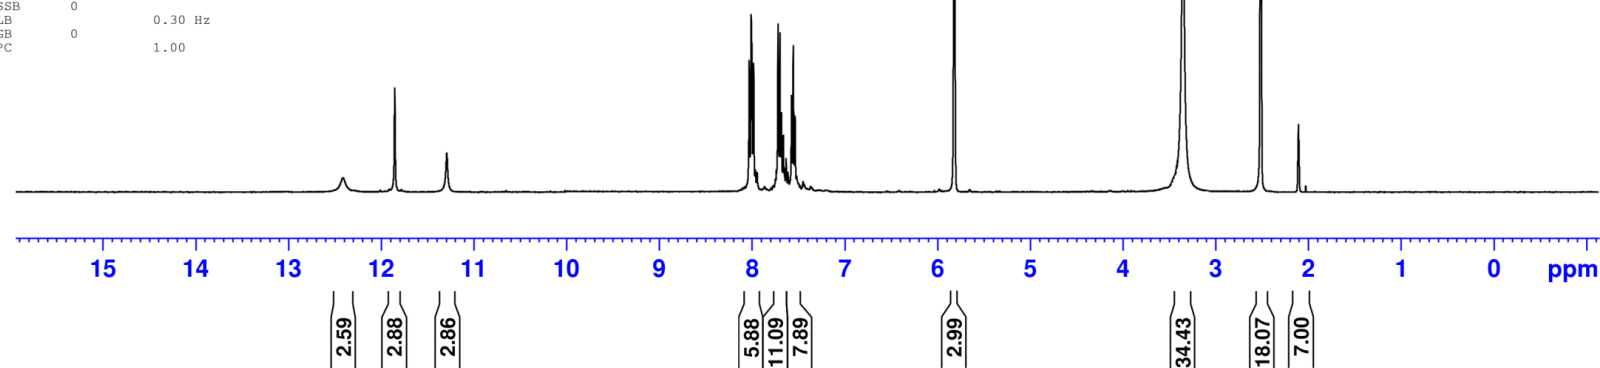

**<sup>1</sup>H-NMR of *N*-(4-(4-chlorophenyl)-6-(5-methyl-3-oxo-2,3-dihydro-1H-pyrazol-1-yl)-7H-pyrazolo[3,4-*d*]pyrimidin-3-yl)benzamide (13b).**

Paula Soliman\_H\_M16b\_D2O

Microanalytical Unit - FOPCU - NMR laboratory  
www.pharma.cu.edu.eg dir-mau.fopcu@pharma.cu.edu.eg

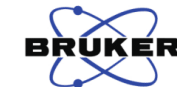

Current Data Parameters  
NAME Paula Soliman\_H\_M16b\_D2O  
EXPNO 10  
PROCNO 1

F2 - Acquisition Parameters  
Date\_ 20210713  
Time 12.27  
INSTRUM spect  
PROBHD 5 mm PABBO BB/  
PULPROG zg30  
TD 65536  
SOLVENT DMSO  
NS 32  
DS 2  
SWH 8012.820 Hz  
FIDRES 0.122266 Hz  
AQ 4.0894465 sec  
RG 202.37  
DW 62.400 usec  
DE 6.50 usec  
TE 298.1 K  
D1 1.00000000 sec  
TD0 1

----- CHANNEL f1 -----  
SF01 400.1924713 MHz  
NUC1 1H  
P1 15.00 usec  
PLW1 10.39999962 W

F2 - Processing parameters  
SI 65536  
SF 400.1900000 MHz  
WDW EM  
SSB 0  
LB 0.30 Hz  
GB 0  
PC 1.00

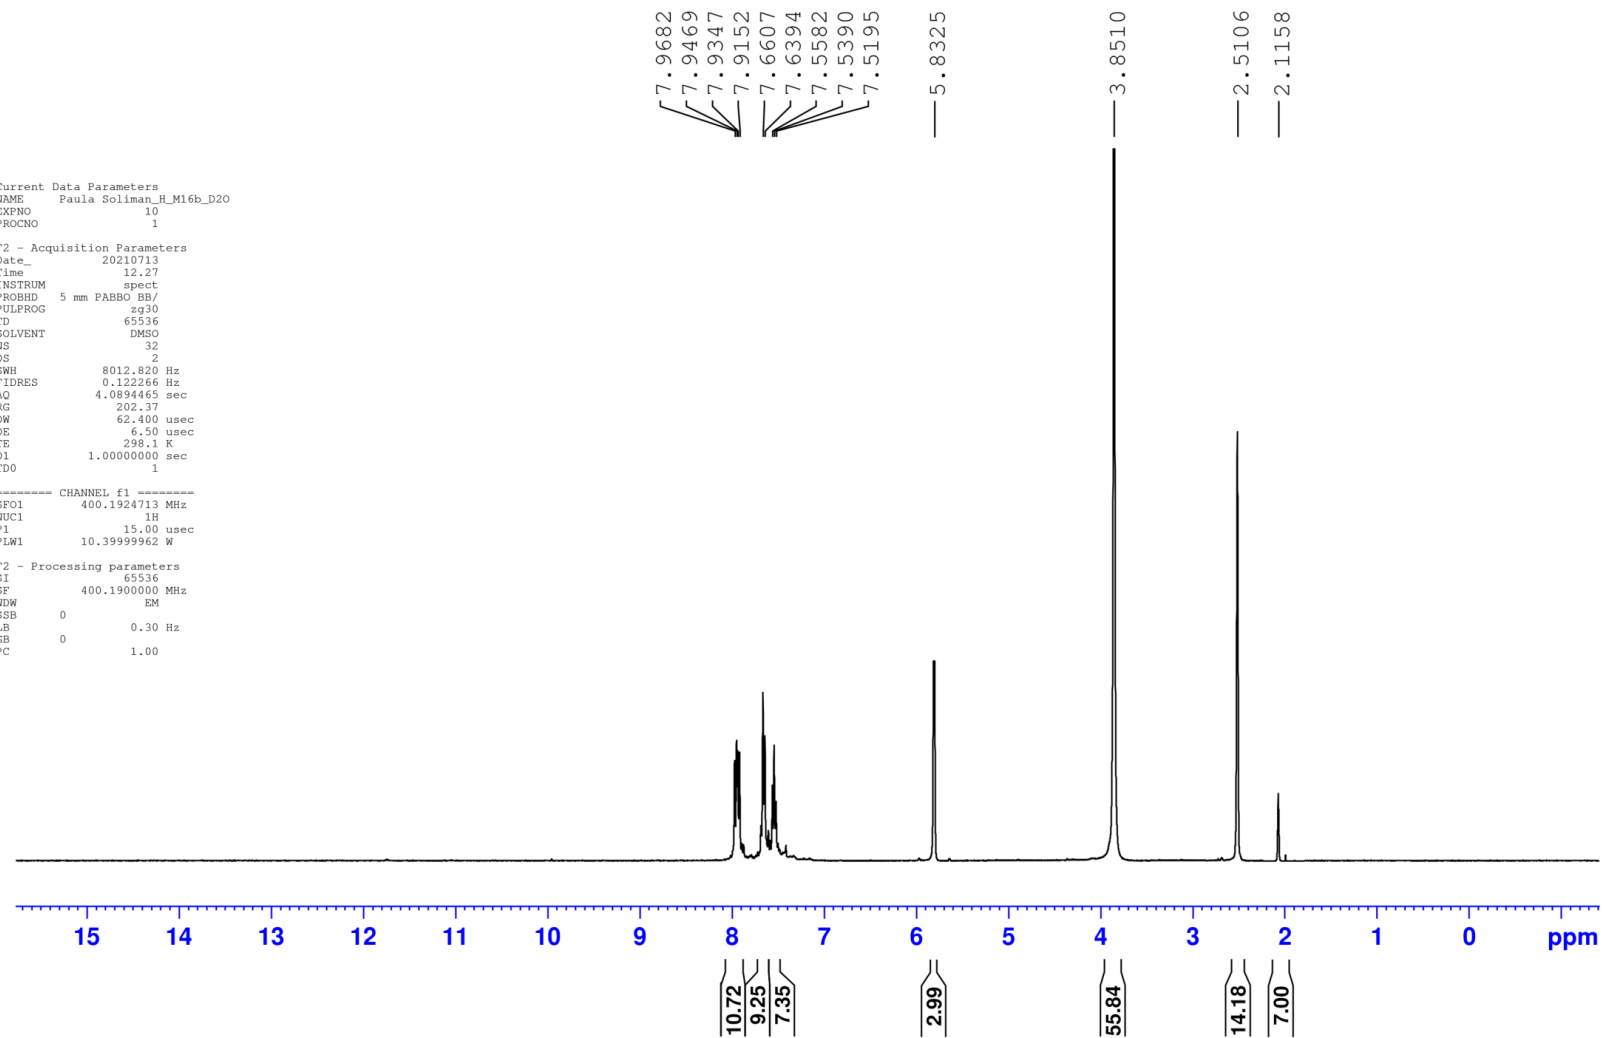

D<sub>2</sub>O of *N*-(4-(4-chlorophenyl)-6-(5-methyl-3-oxo-2,3-dihydro-1H-pyrazol-1-yl)-7H-pyrazolo[3,4-d]pyrimidin-3-yl)benzamide (13b).

Paula Soliman\_C\_M16b

Microanalytical Unit - FOPCU - NMR laboratory  
www.pharma.cu.edu.eg dir-mau.fopcu@pharma.cu.edu.eg

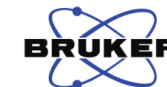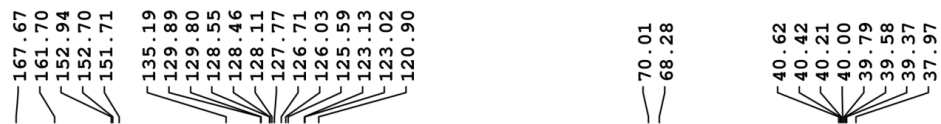

Current Data Parameters  
NAME Paula Soliman\_C\_M16b  
EXPNO 10  
PROCNO 1

F2 - Acquisition Parameters  
Date\_ 20210713  
Time 11.02  
INSTRUM spect  
PROBHD 5 mm PABBO BB/  
PULPROG zgpg30  
TD 65536  
SOLVENT DMSO  
NS 1500  
DS 4  
SWH 24038.461 Hz  
FIDRES 0.366798 Hz  
AQ 1.3631488 sec  
RG 202.37  
DW 20.800 usec  
DE 6.50 usec  
TE 298.1 K  
D1 2.00000000 sec  
D11 0.03000000 sec  
TD0 1

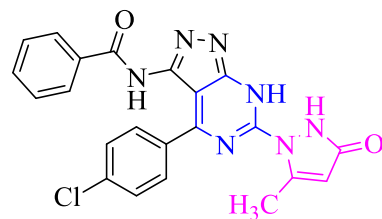

==== CHANNEL f1 =====  
SFO1 100.6379178 MHz  
NUC1 13C  
P1 10.00 usec  
PLW1 45.00000000 W  
==== CHANNEL f2 =====  
SFO2 400.1916008 MHz  
NUC2 1H  
CPDPRG[2] waltz16

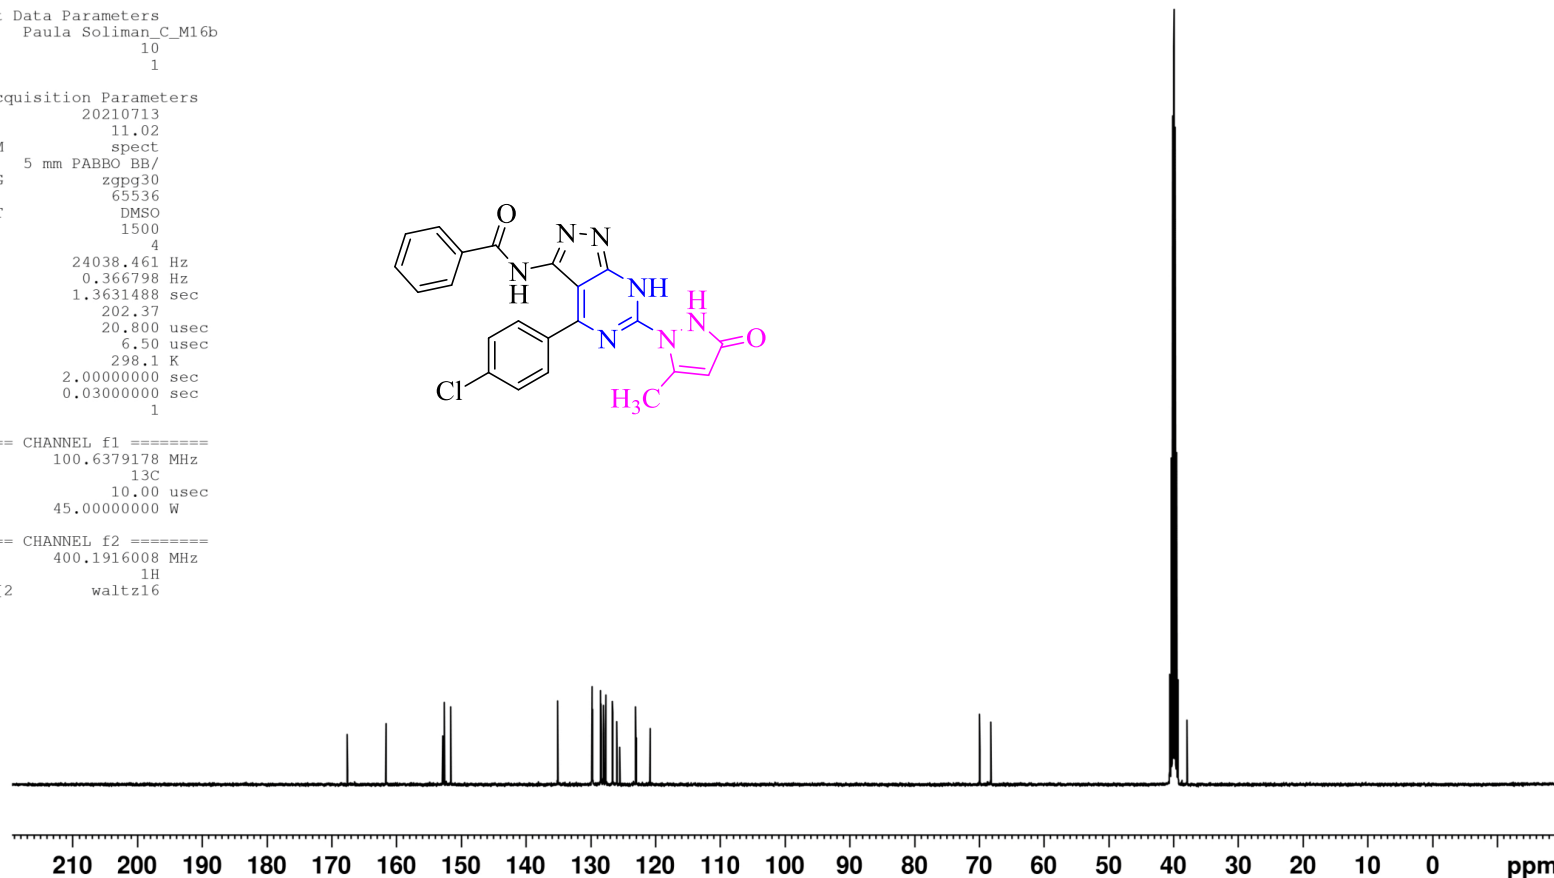

<sup>13</sup>C-NMR of *N*-(4-(4-chlorophenyl)-6-(5-methyl-3-oxo-2,3-dihydro-1H-pyrazol-1-yl)-7H-pyrazolo[3,4-d]pyrimidin-3-yl)benzamide (13b).

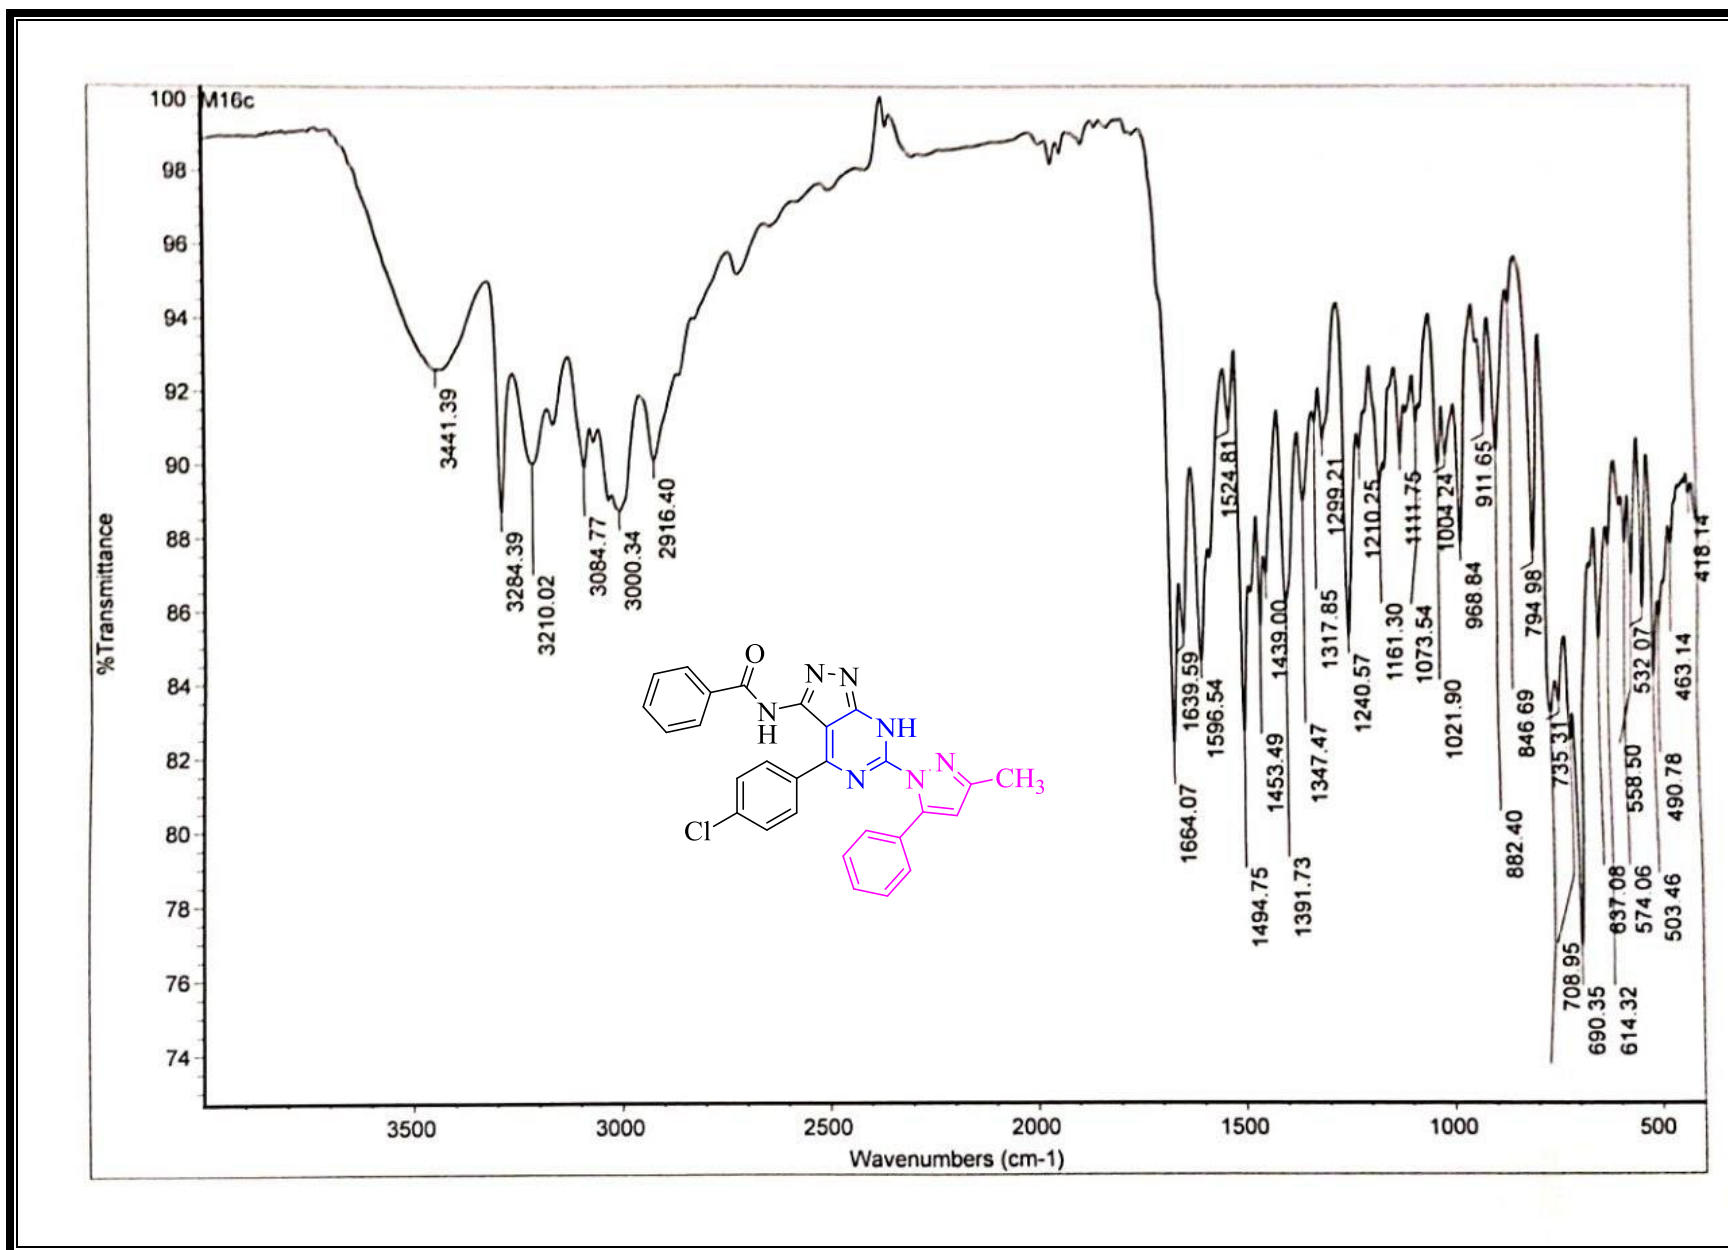

IR of *N*-(4-(4-chlorophenyl)-6-(3-methyl-5-phenyl-1H-pyrazol-1-yl)-7H-pyrazolo[3,4-d]pyrimidin-3-yl)benzamide (13c).



Paula Soliman\_H\_M16c

Microanalytical Unit - FOPCU - NMR laboratory  
www.pharma.cu.edu.eg dir-mau.fopcu@pharma.cu.edu.eg

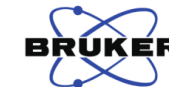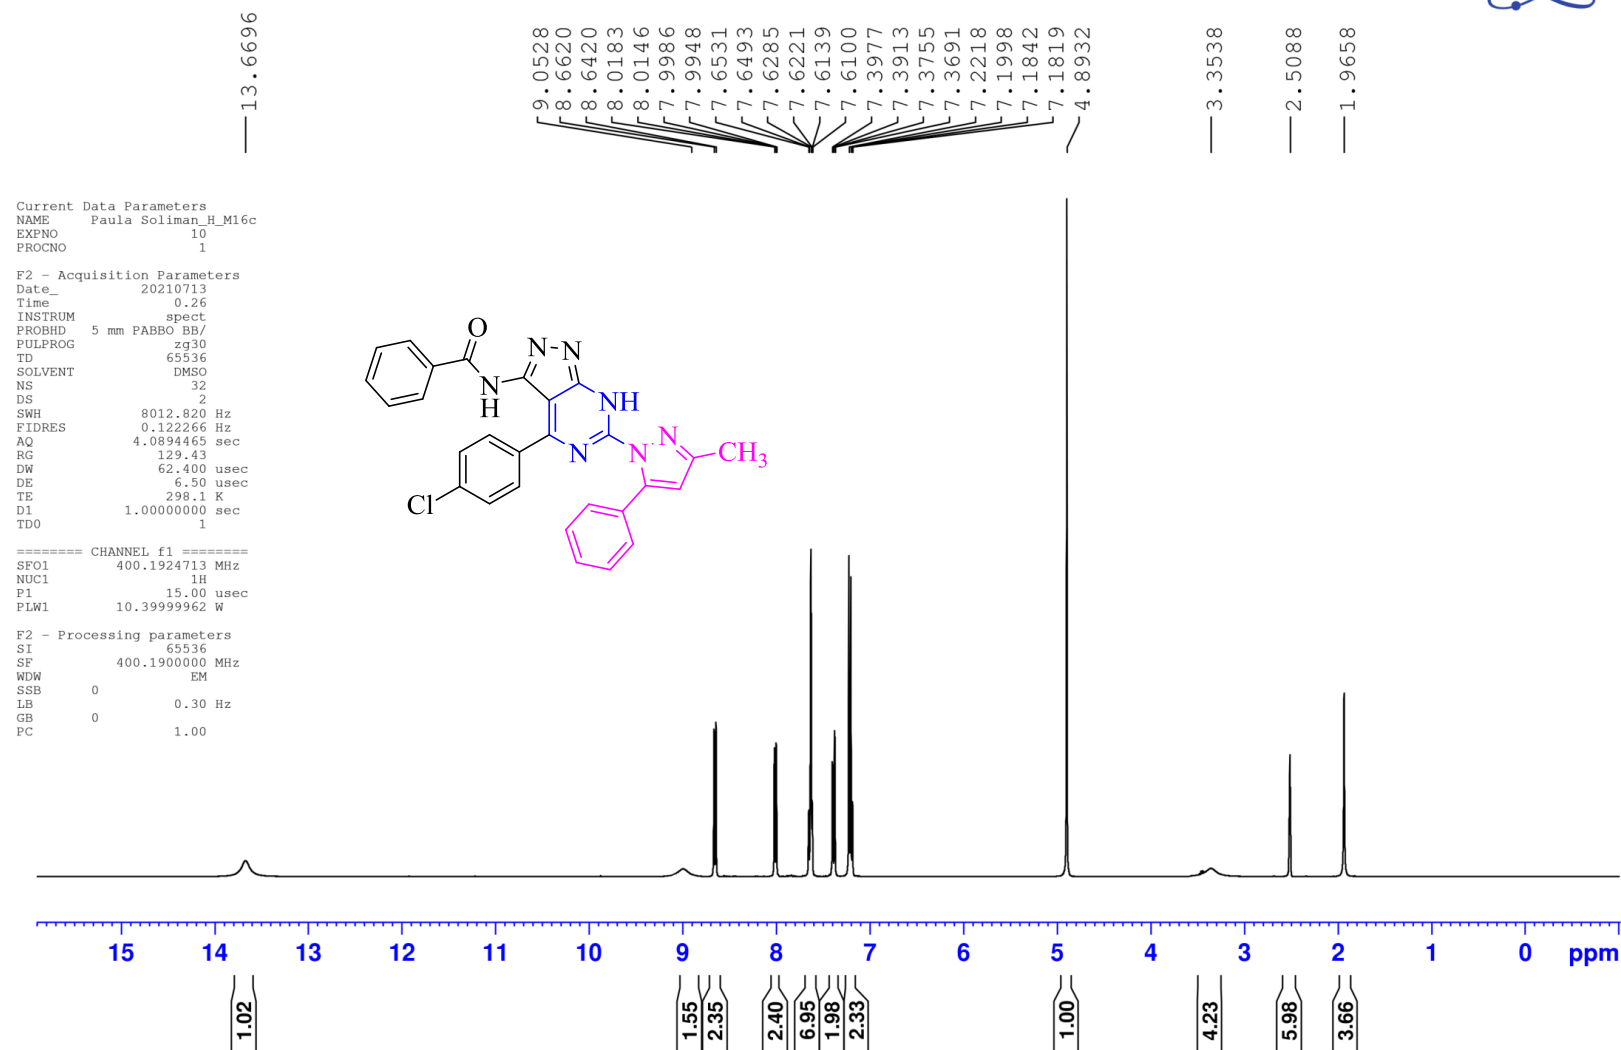

**<sup>1</sup>H-NMR of *N*-(4-(4-chlorophenyl)-6-(3-methyl-5-phenyl-1H-pyrazol-1-yl)-7H-pyrazolo[3,4-d]pyrimidin-3-yl)benzamide (13c).**

Paula Soliman\_H\_M16c\_D2O

Microanalytical Unit - FOPCU - NMR laboratory  
www.pharma.cu.edu.eg dir-mau.fopcu@pharma.cu.edu.eg

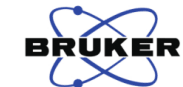

Current Data Parameters  
NAME Paula Soliman\_H\_M16c\_D2c  
EXPNO 10  
PROCNO 1

F2 - Acquisition Parameters  
Date\_ 20210713  
Time 14.34  
INSTRUM spect  
PROBHD 5 mm PABBO BB/  
PULPROG zg30  
TD 65536  
SOLVENT DMSO  
NS 32  
DS 2  
SWH 8012.820 Hz  
FIDRES 0.122266 Hz  
AQ 4.0894465 sec  
RG 129.43  
DW 62.400 usec  
DE 6.50 usec  
TE 298.0 K  
D1 1.0000000 sec  
TDO 1

----- CHANNEL f1 -----  
SFO1 400.1924713 MHz  
NUC1 1H  
P1 15.00 usec  
PLW1 10.39999962 W

F2 - Processing parameters  
SI 65536  
SF 400.1900000 MHz  
WDW EM  
SSB 0  
LB 0.30 Hz  
GB 0  
PC 1.00

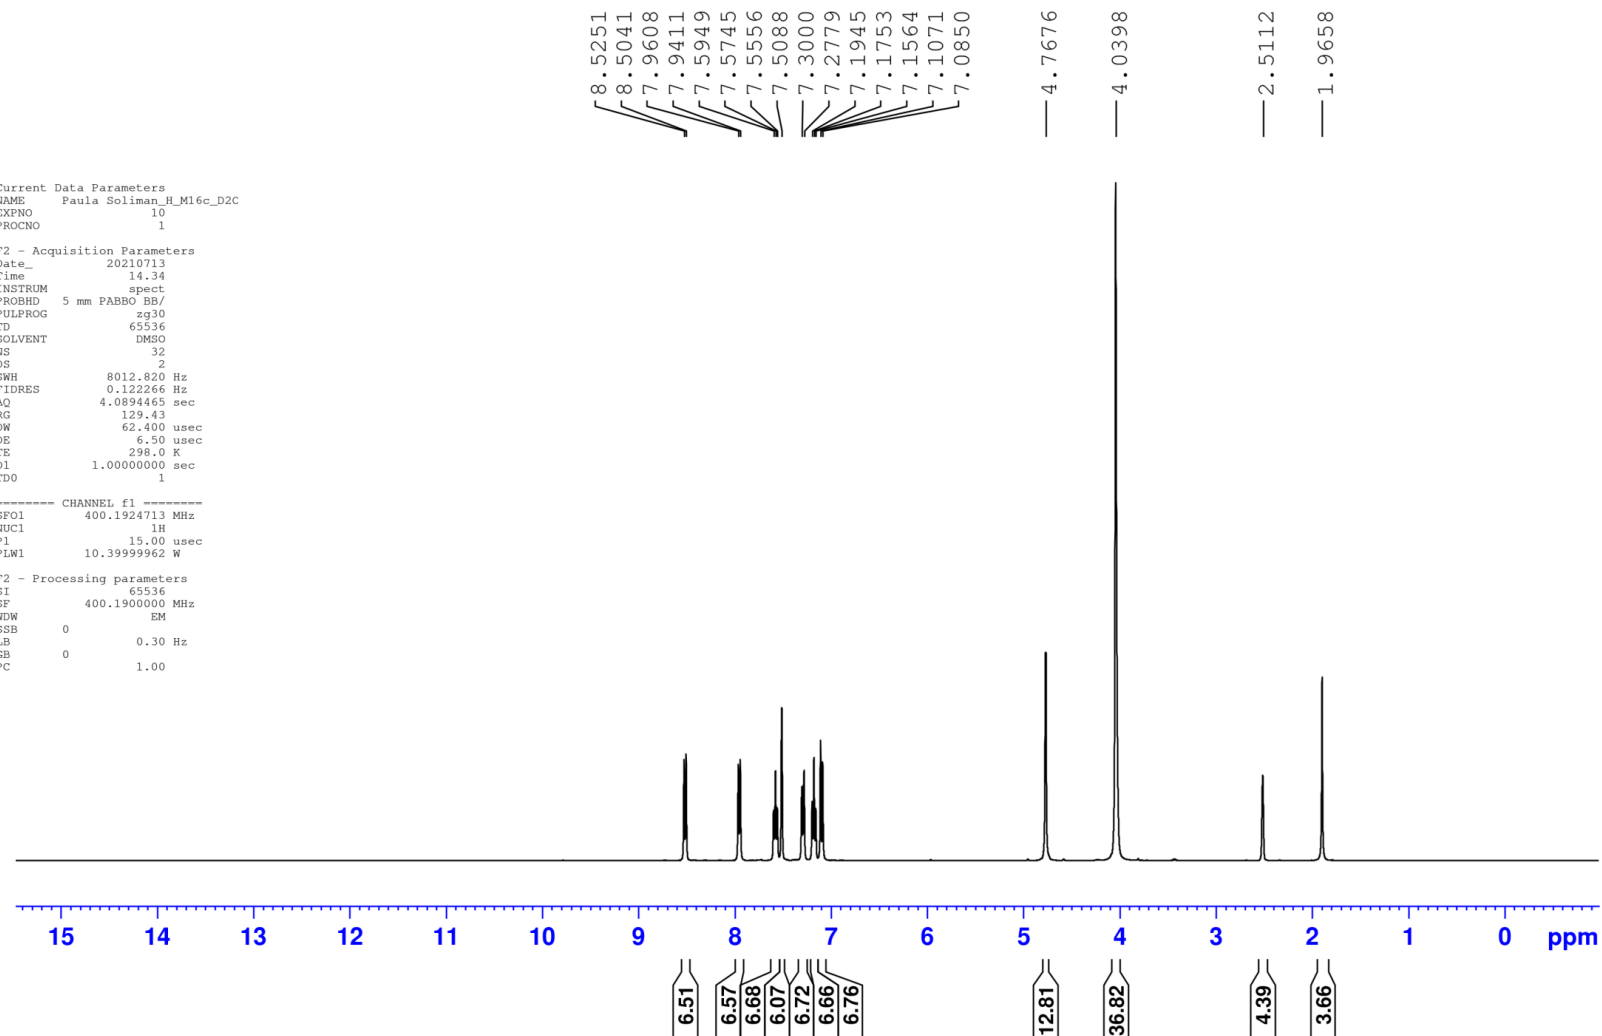

D<sub>2</sub>O of *N*-(4-(4-chlorophenyl)-6-(3-methyl-5-phenyl-1H-pyrazol-1-yl)-7H-pyrazolo[3,4-d]pyrimidin-3-yl)benzamide (13c).

Paula Soliman\_C\_M16c

Microanalytical Unit - FOPCU - NMR laboratory  
www.pharma.cu.edu.eg dir-mau.fopcu@pharma.cu.edu.eg

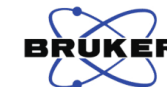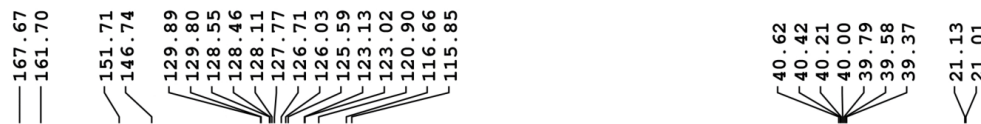

Current Data Parameters  
NAME Paula Soliman\_C\_M16c  
EXPNO 10  
PROCNO 1

F2 - Acquisition Parameters  
Date\_ 20210713  
Time 13.20  
INSTRUM spect  
PROBHD 5 mm PABBO BB/  
PULPROG zgpg30  
TD 65536  
SOLVENT DMSO  
NS 1500  
DS 4  
SWH 24038.461 Hz  
FIDRES 0.366798 Hz  
AQ 1.3631488 sec  
RG 202.37  
DW 20.800 usec  
DE 6.50 usec  
TE 298.1 K  
D1 2.00000000 sec  
D11 0.03000000 sec  
TD0 1

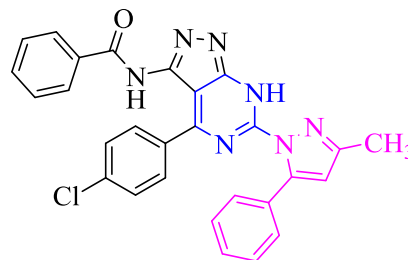

==== CHANNEL f1 =====  
SFO1 100.6379178 MHz  
NUC1 13C  
P1 10.00 usec  
PLW1 45.00000000 W  
==== CHANNEL f2 =====  
SFO2 400.1916008 MHz  
NUC2 1H  
CPDPRG[2] waltz16

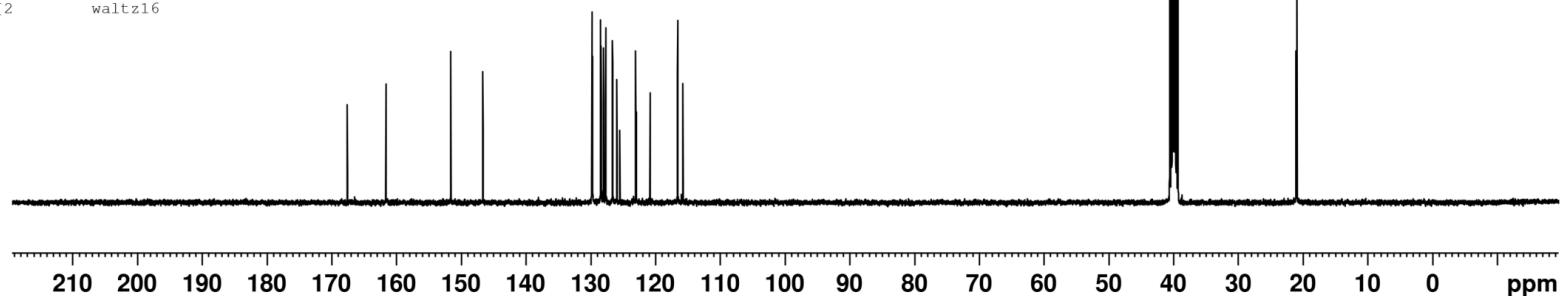

**<sup>13</sup>C-NMR of *N*-(4-(4-chlorophenyl)-6-(3-methyl-5-phenyl-1H-pyrazol-1-yl)-7H-pyrazolo[3,4-d]pyrimidin-3-yl)benzamide (13c).**

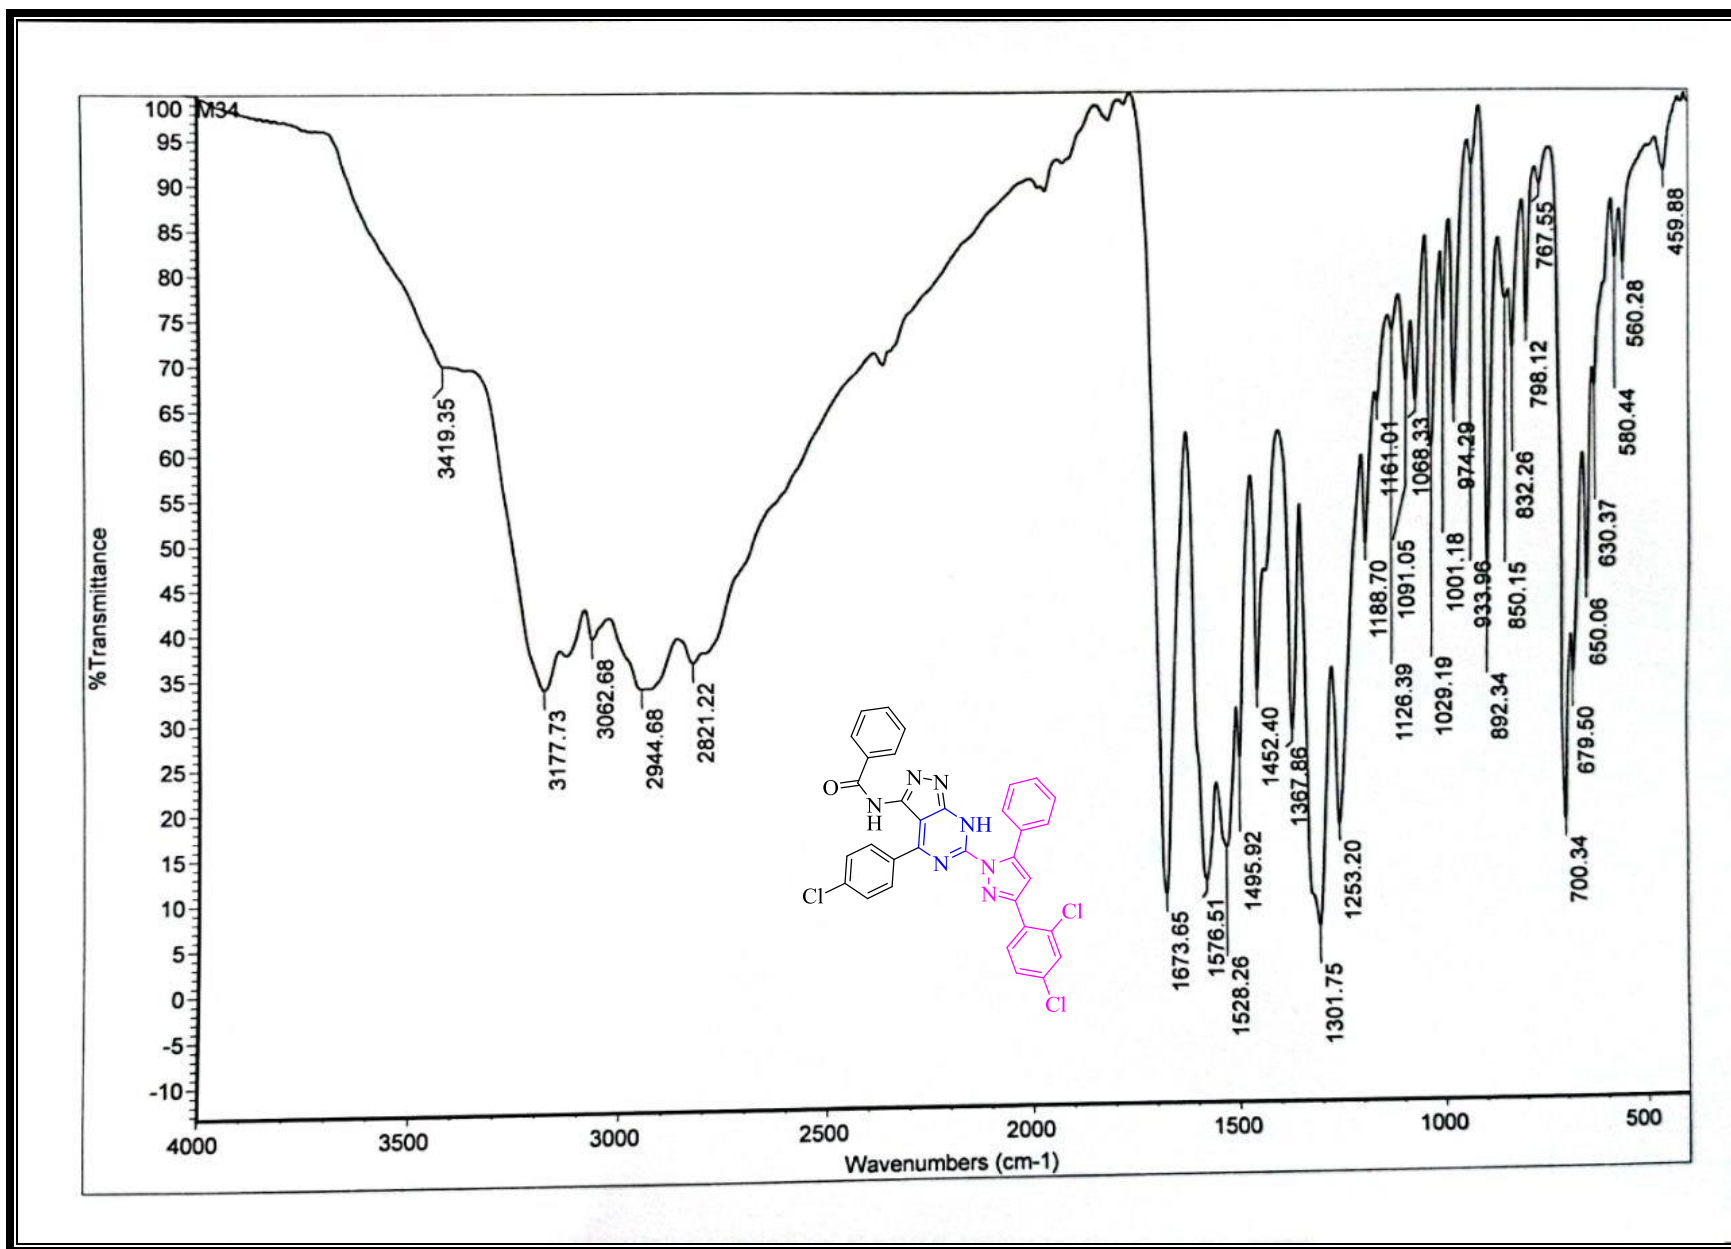

IR of *N*-(4-(4-chlorophenyl)-6-(5-(2,4-dichlorophenyl)-3-phenyl-1H-pyrazol-1-yl)-7H-pyrazolo[3,4-d]pyrimidin-3-yl)benzamide (14).

Paula Soliman\_H\_M34

Microanalytical Unit - FOPCU - NMR laboratory  
www.pharma.cu.edu.eg dir-mau.fopcu@pharma.cu.edu.eg

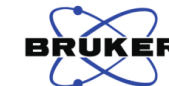

14.1417

8.9593  
8.1893  
8.1806  
8.1607  
8.1503  
8.1391  
8.1351  
8.0817  
8.0601  
8.0416  
8.0220  
7.9997  
7.9785  
7.8317  
7.7927  
7.7220  
7.7188  
7.7048  
7.7018  
7.6822  
7.6627  
7.6602  
7.6458  
7.6428  
7.5746  
7.5534  
5.3548

3.3417

2.5081  
2.4082

Current Data Parameters  
NAME Paula Soliman\_H\_M34  
EXPNO 10  
PROCNO 1

F2 - Acquisition Parameters  
Date\_ 20220125  
Time 1.58  
INSTRUM spect  
PROBHD 5 mm PABBO BB/  
PULPROG zg30  
TD 65536  
SOLVENT DMSO  
NS 32  
DS 2  
SWH 8012.820 Hz  
FIDRES 0.122266 Hz  
AQ 4.0894465 sec  
RG 169.46  
DW 62.400 usec  
DE 6.50 usec  
TE 298.0 K  
D1 1.0000000 sec  
TD0 1

===== CHANNEL f1 =====  
SFO1 400.1924713 MHz  
NUC1 1H  
P1 15.00 usec  
PLW1 10.39999962 W

F2 - Processing parameters  
SI 65536  
SF 400.1900000 MHz  
WDW EM  
SSB 0  
LB 0.30 Hz  
GB 0  
PC 1.00

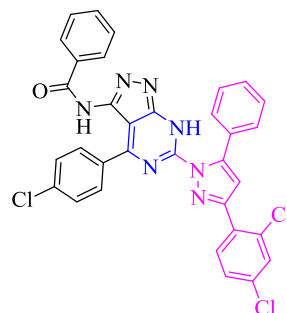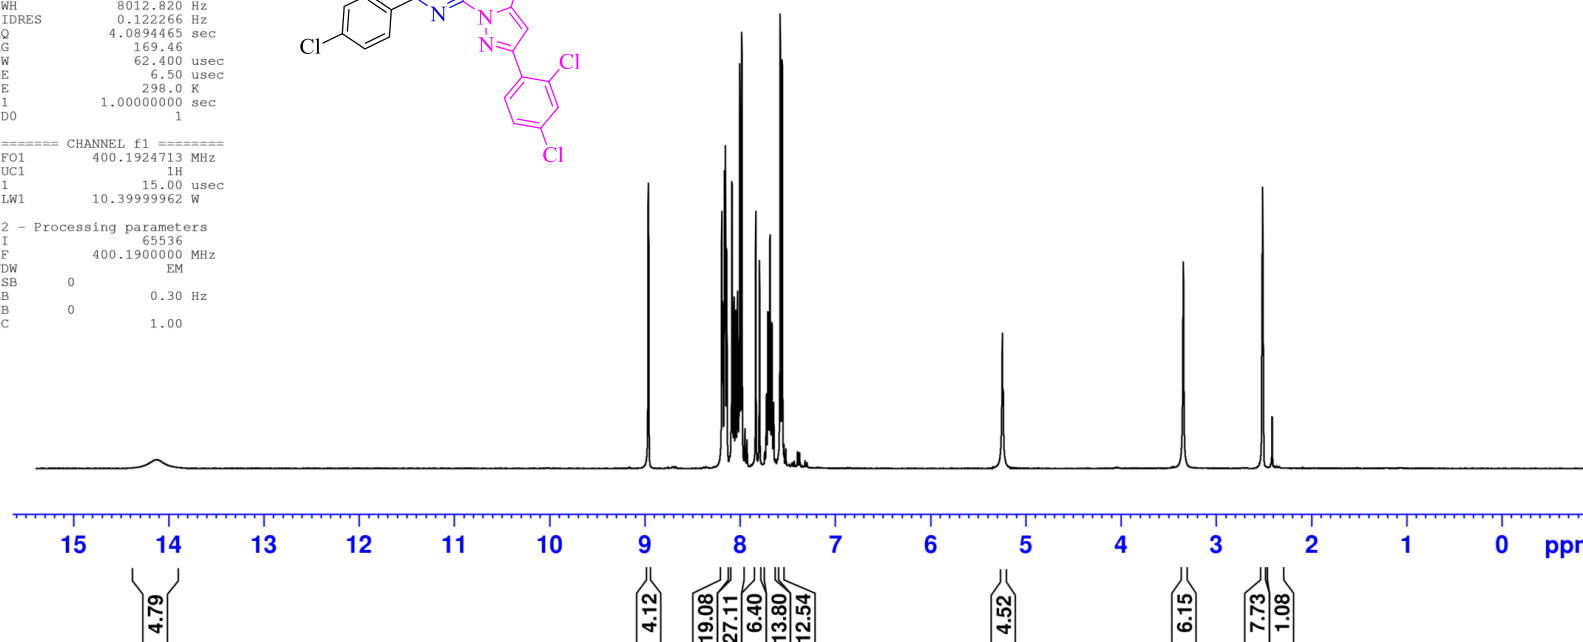

<sup>1</sup>H-NMR of *N*-(4-(4-chlorophenyl)-6-(5-(2,4-dichlorophenyl)-3-phenyl-1H-pyrazol-1-yl)-7H-pyrazolo[3,4-d]pyrimidin-3-yl)benzamide (14).

Paula Soliman\_H\_M34\_D2O

Microanalytical Unit - FOPCU - NMR laboratory  
www.pharma.cu.edu.eg dir-mau.fopcu@pharma.cu.edu.eg

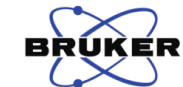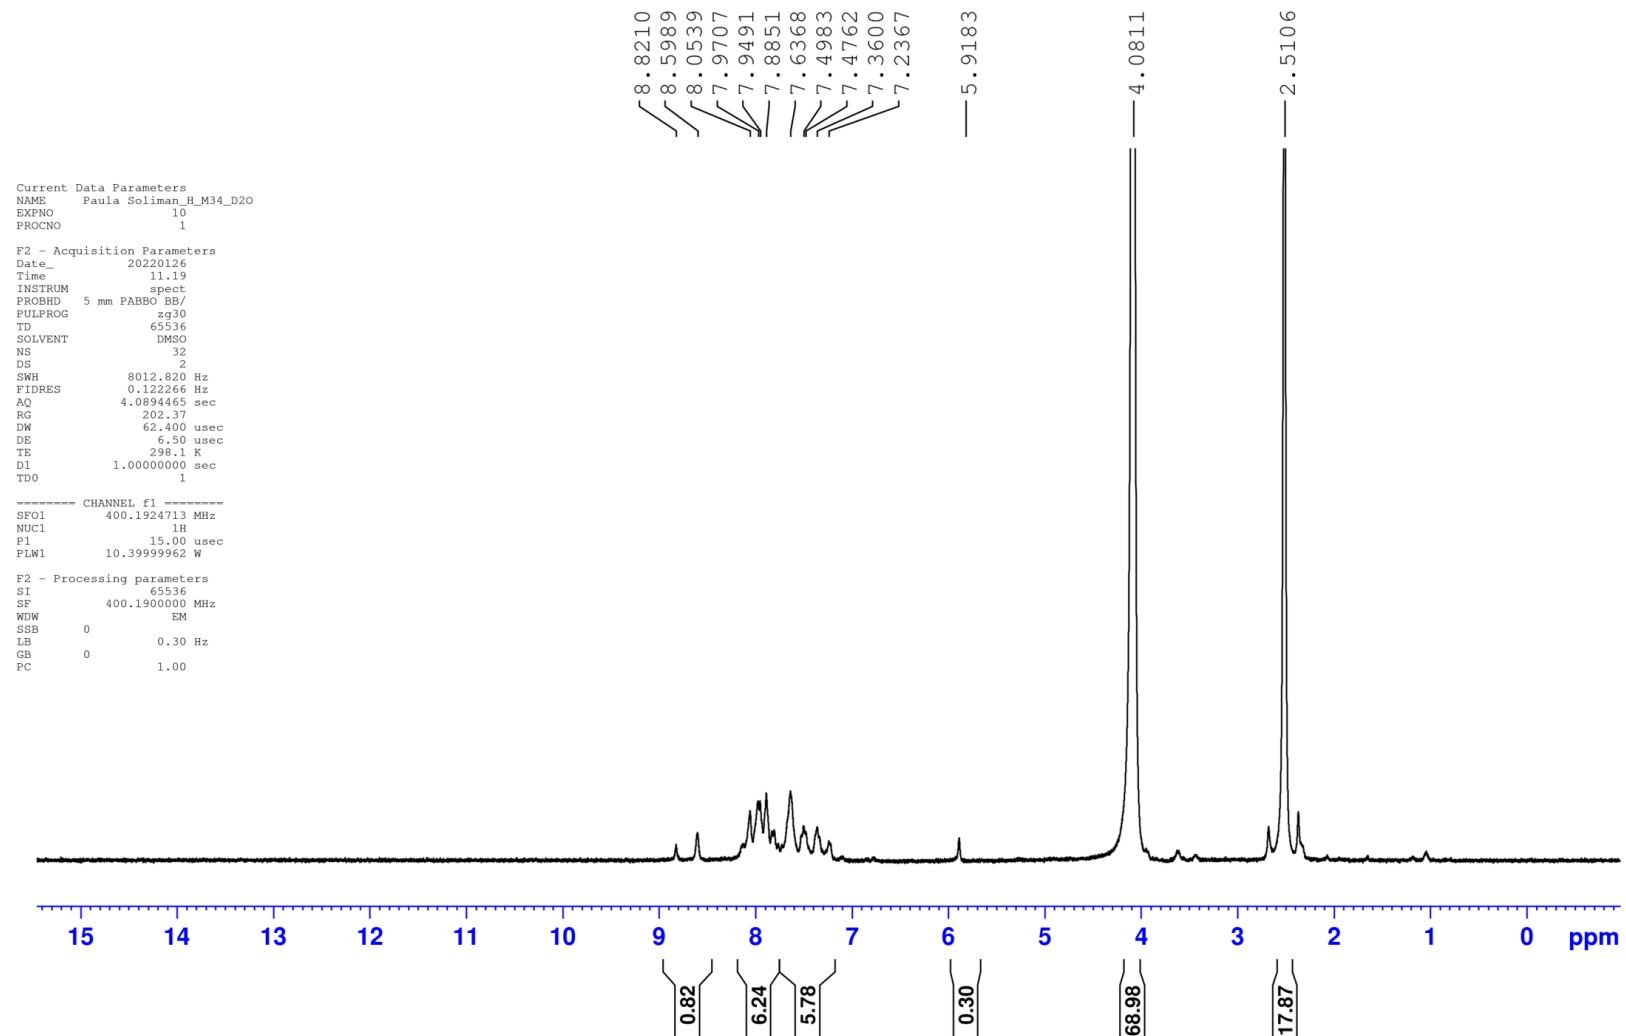

D<sub>2</sub>O of *N*-(4-(4-chlorophenyl)-6-(5-(2,4-dichlorophenyl)-3-phenyl-1*H*-pyrazol-1-yl)-7*H*-pyrazolo[3,4-*d*]pyrimidin-3-yl)benzamide (14).

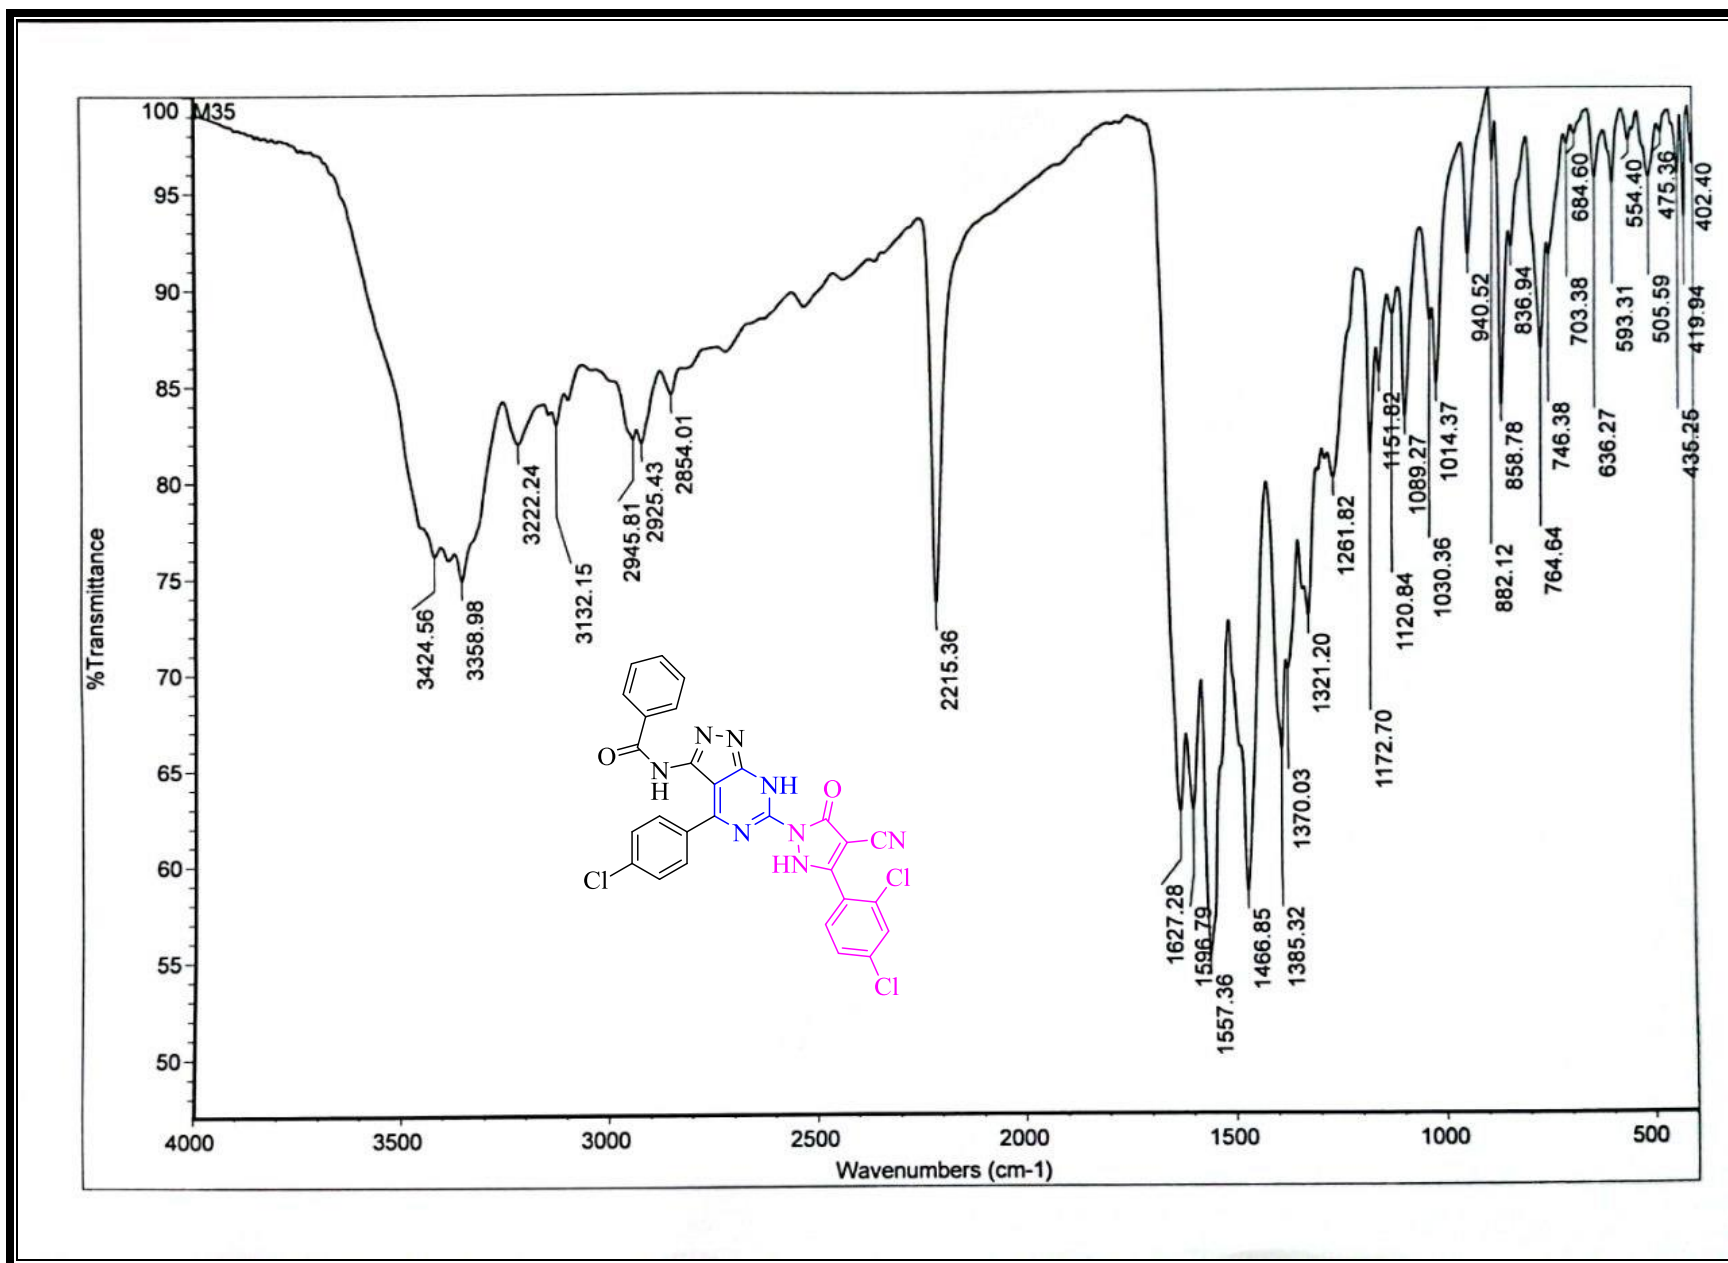

IR of *N*-(4-(4-chlorophenyl)-6-(4-cyano-5-(2,4-dichlorophenyl)-3-oxo-2,3-dihydro-1H-pyrazol-1-yl)-7H-pyrazolo[3,4-d]pyrimidin-3-yl)benzamide (15).

Paula Soliman\_H\_M35

Microanalytical Unit - FOPCU - NMR laboratory  
www.pharma.cu.edu.eg dir-mau.fopcu@pharma.cu.edu.eg

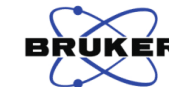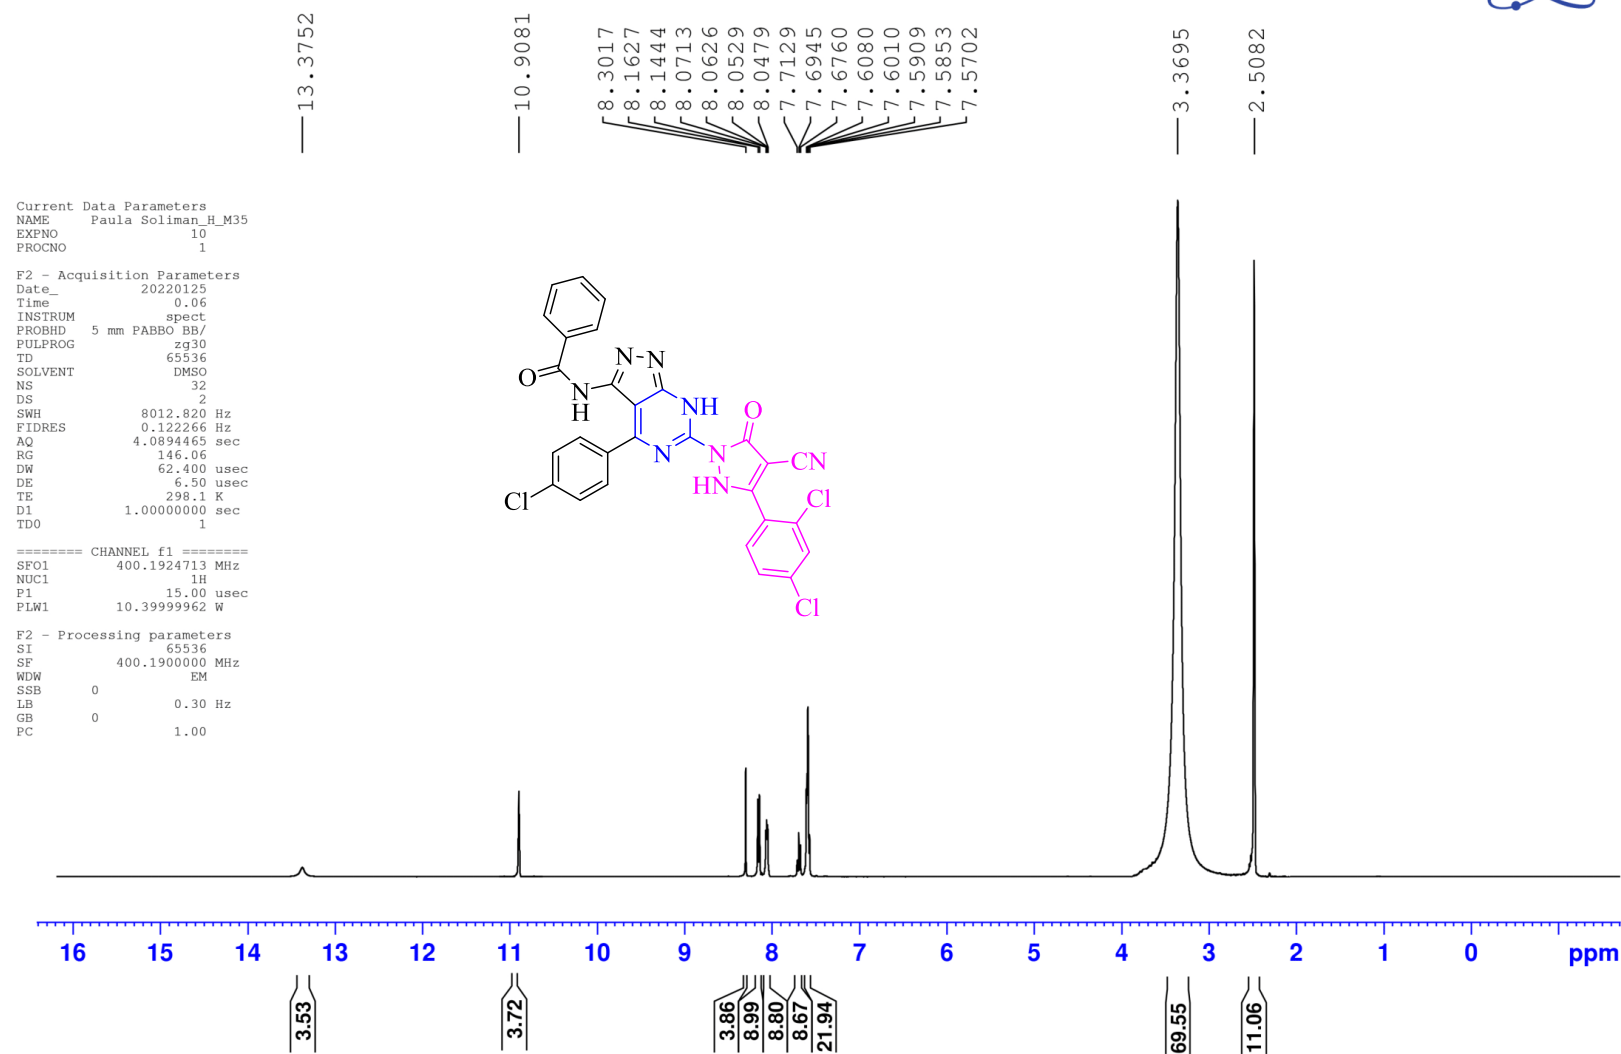

**<sup>1</sup>H-NMR of *N*-(4-(4-chlorophenyl)-6-(4-cyano-5-(2,4-dichlorophenyl)-3-oxo-2,3-dihydro-1H-pyrazol-1-yl)-7H-pyrazolo[3,4-d]pyrimidin-3-yl)benzamide (15).**



Paula Soliman\_H\_M35\_D2O

Microanalytical Unit - FOPCU - NMR laboratory  
www.pharma.cu.edu.eg dir-mau.fopcu@pharma.cu.edu.eg

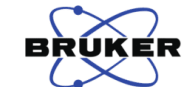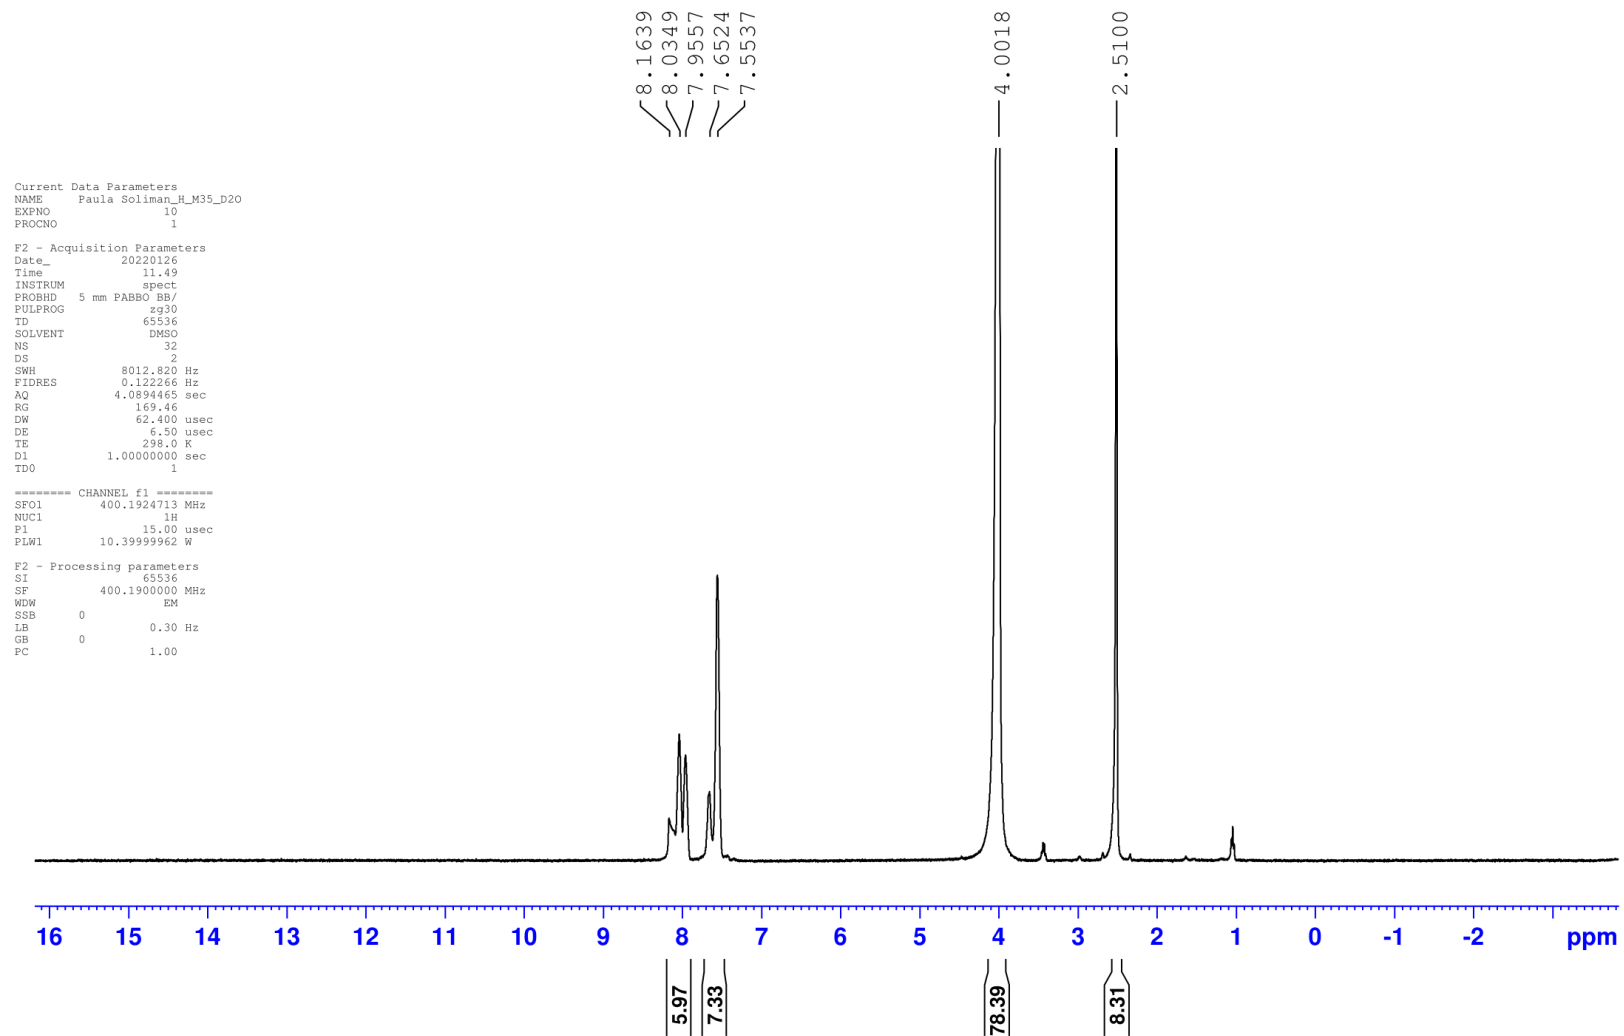

D<sub>2</sub>O of *N*-(4-(4-chlorophenyl)-6-(4-cyano-5-(2,4-dichlorophenyl)-3-oxo-2,3-dihydro-1H-pyrazol-1-yl)-7H-pyrazolo[3,4-d]pyrimidin-3-yl)benzamide (15).

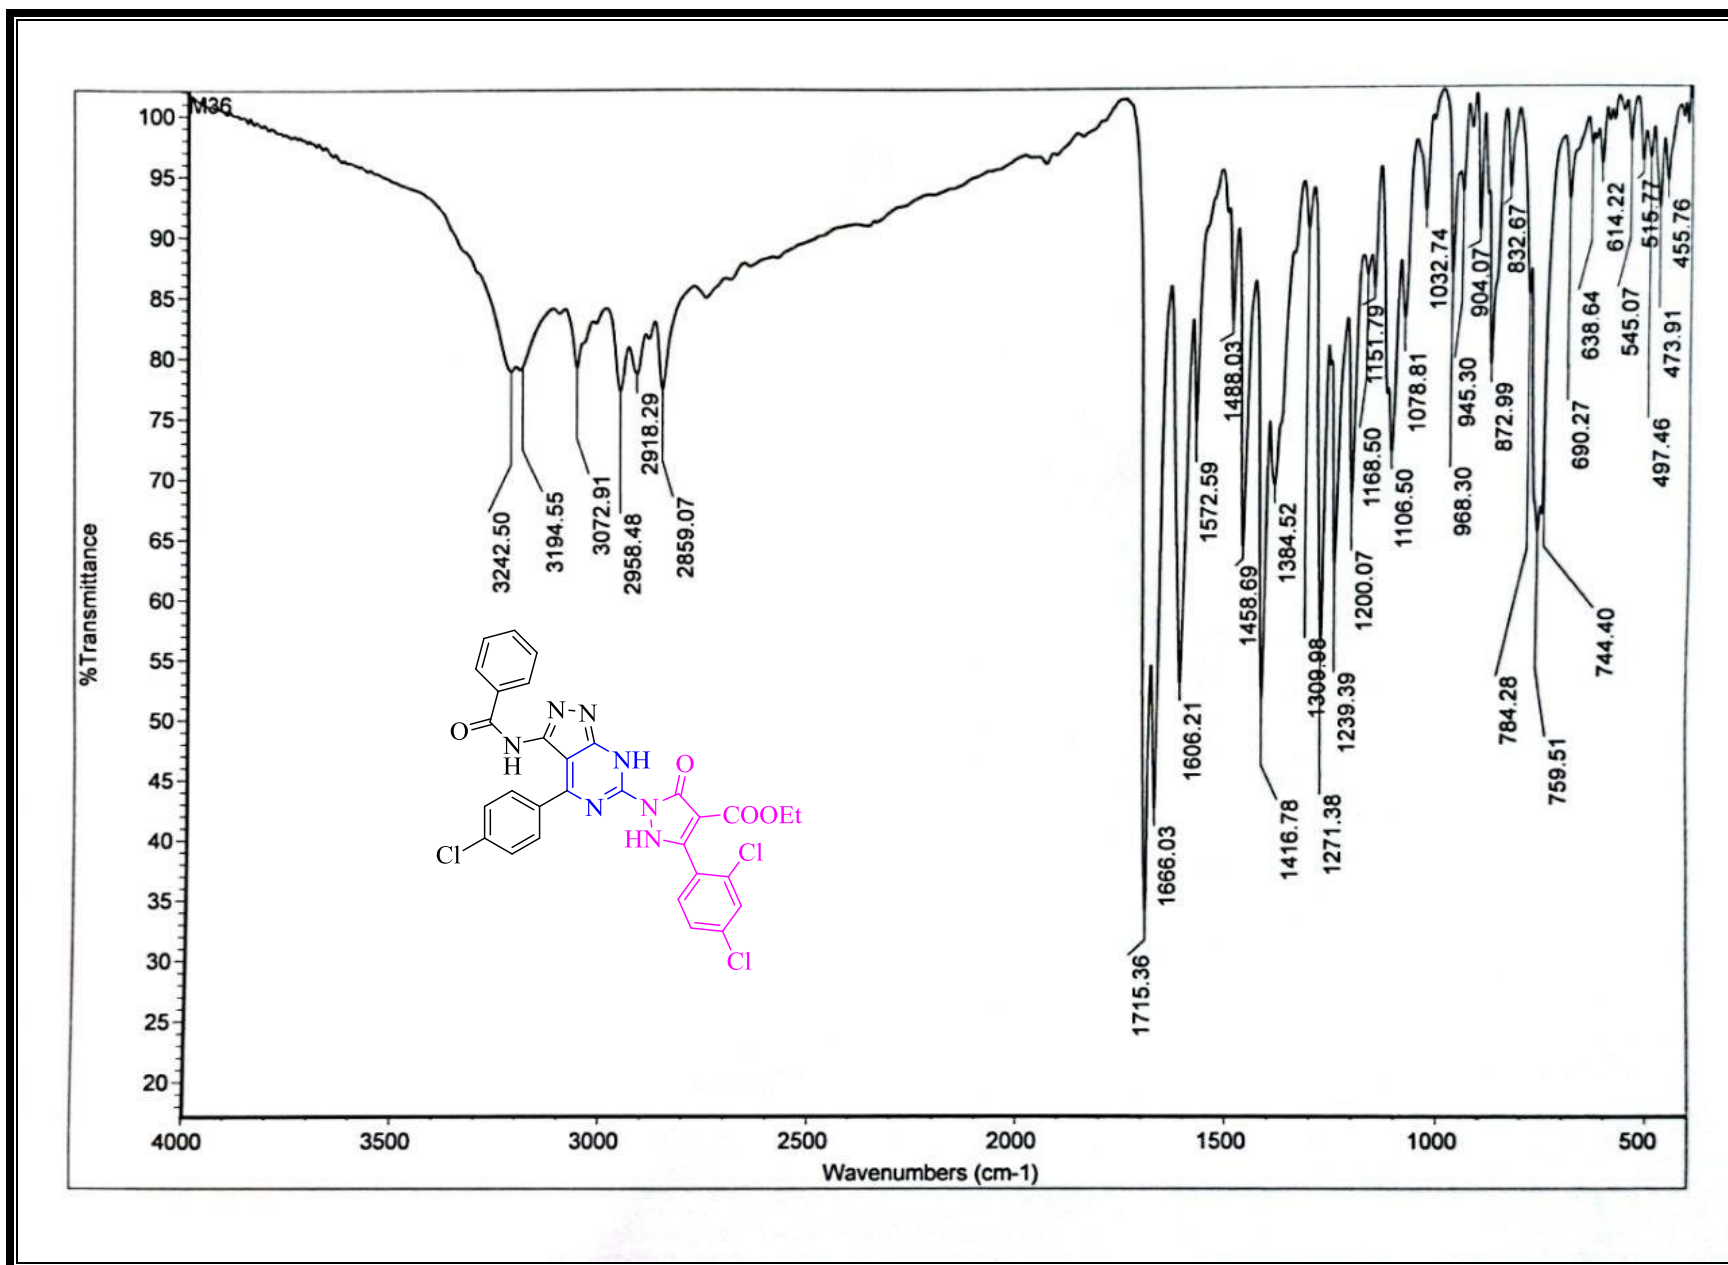

IR of Ethyl 1-(3-benzamido-4-(4-chlorophenyl)-7H-pyrazolo[3,4-d]pyrimidin-6-yl)-5-(2,4-dichlorophenyl)-3-oxo-2,3-dihydro-1H-pyrazole-4-carboxylate (16).

Paula Soliman\_H\_M36

Microanalytical Unit - FOPCU - NMR laboratory  
www.pharma.cu.edu.eg dir-mau.fopcu@pharma.cu.edu.eg

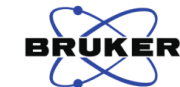

14.1866  
14.1684

12.8926

10.6528

8.1228  
8.0929  
8.0744  
7.7007  
7.6823  
7.6639  
7.5918  
7.5724  
7.5536

4.2056  
4.1879  
4.1702  
4.1526  
3.5148  
3.4539  
3.4363  
2.5676  
2.5079

1.2614  
1.2437  
1.2260

Current Data Parameters  
NAME Paula Soliman\_H\_M36  
EXPNO 10  
PROCNO 1

F2 - Acquisition Parameters  
Date\_ 20220126  
Time 1.52  
INSTRUM spect  
PROBHD 5 mm PABBO BB/  
PULPROG zg30  
TD 65536  
SOLVENT DMSO  
NS 32  
DS 2  
SWH 8012.820 Hz  
FIDRES 0.122266 Hz  
AQ 4.089465 sec  
RG 189.46  
DW 62.400 usec  
DE 6.50 usec  
TE 298.1 K  
D1 1.00000000 sec  
TD0 1

===== CHANNEL f1 =====  
SFO1 400.1924713 MHz  
NUC1 1H  
P1 15.00 usec  
PLW1 10.39999962 W

F2 - Processing parameters  
SI 65536  
SF 400.1900000 MHz  
WDW EM  
SSB 0  
LB 0.30 Hz  
GB 0  
PC 1.00

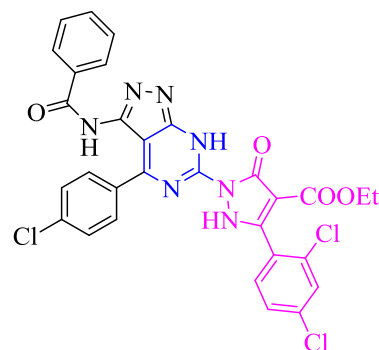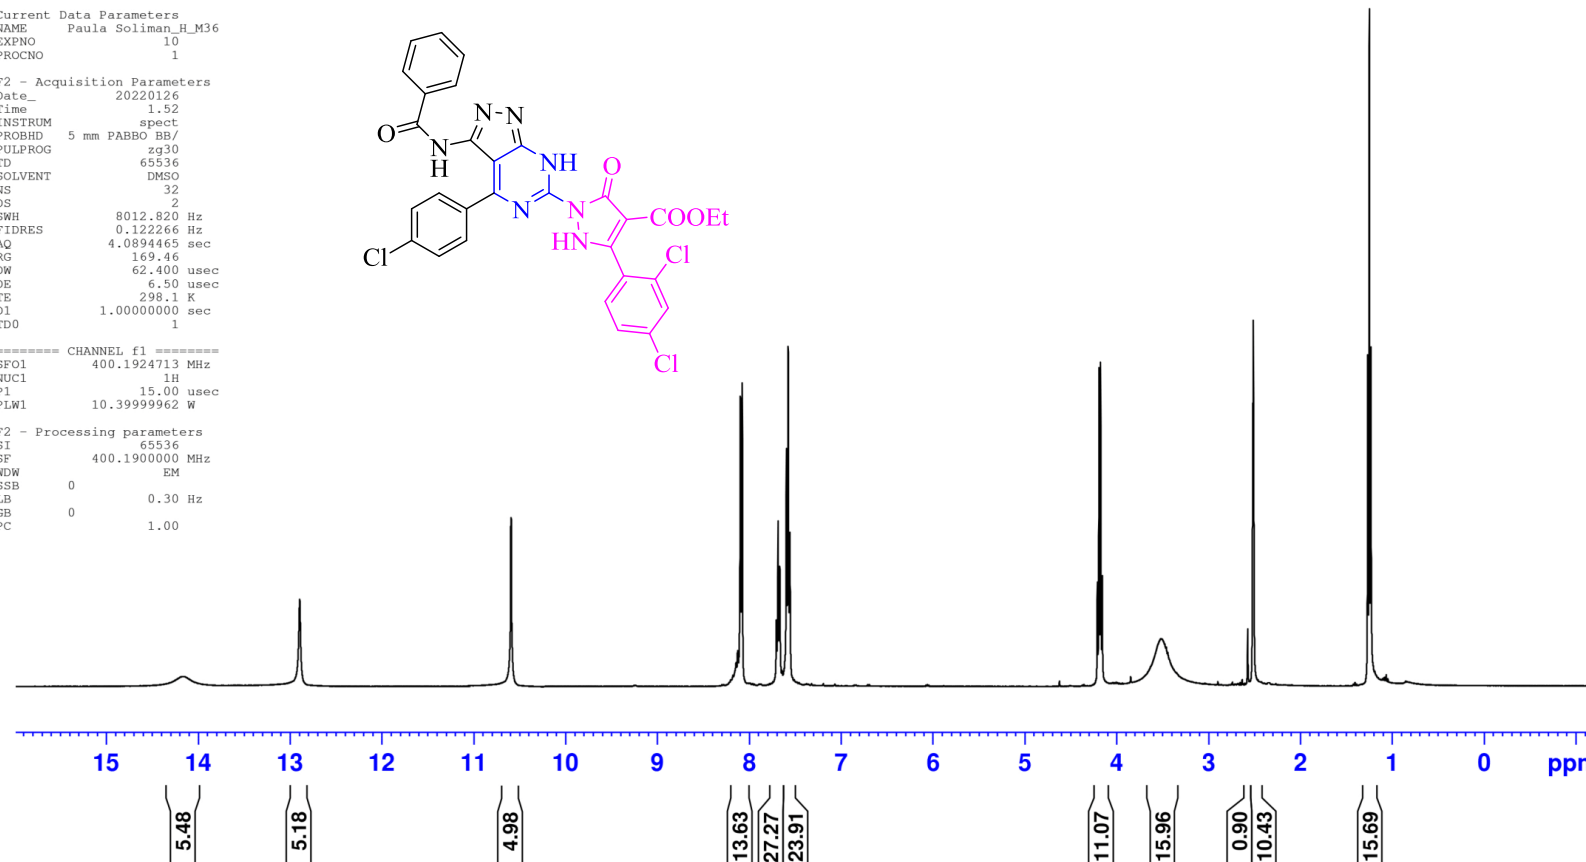

<sup>1</sup>H-NMR of Ethyl 1-(3-benzamido-4-(4-chlorophenyl)-7H-pyrazolo[3,4-d]pyrimidin-6-yl)-5-(2,4-dichlorophenyl)-3-oxo-2,3-dihydro-1H-pyrazole-4-carboxylate (16).

Paula Soliman\_H\_M36\_D2O

Microanalytical Unit - FOPCU - NMR laboratory  
www.pharma.cu.edu.eg dir-mau.fopcu@pharma.cu.edu.eg

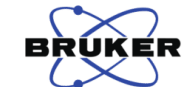

Current Data Parameters  
NAME Paula Soliman\_H\_M36\_D2O  
EXPNO 10  
PROCNO 1

F2 - Acquisition Parameters  
Date\_ 20220127  
Time 11:12  
INSTRUM spect  
PROBHD 5 mm PABBO BB/  
PULPROG zg30  
TD 65536  
SOLVENT DMSO  
NS 32  
DS 2  
SWH 8012.820 Hz  
FIDRES 0.122266 Hz  
AQ 4.0894465 sec  
RG 169.466  
DW 62.400 usec  
DE 6.50 usec  
TE 298.1 K  
D1 1.00000000 sec  
TDO 1

==== CHANNEL f1 =====  
SF01 400.1924713 MHz  
NUC1 1H  
P1 15.00 usec  
PLW1 10.39999962 W

F2 - Processing parameters  
SI 65536  
SF 400.1900000 MHz  
WDW EM  
SSB 0  
LB 0.30 Hz  
GB 0  
PC 1.00

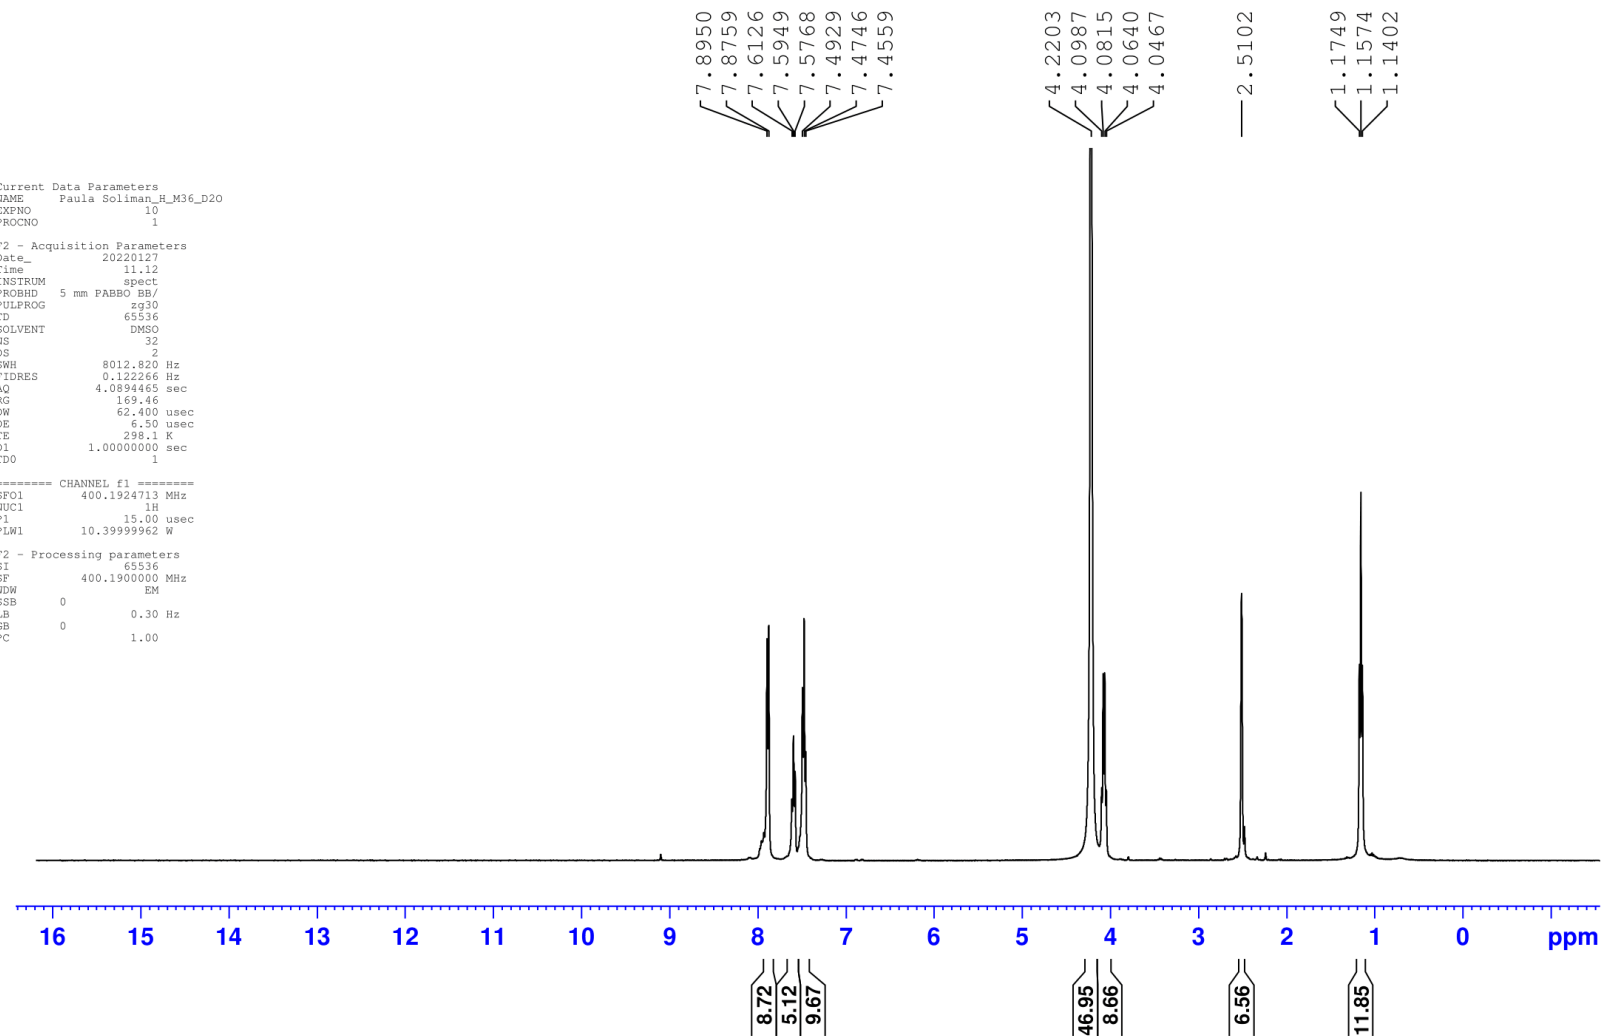

**D<sub>2</sub>O of Ethyl 1-(3-benzamido-4-(4-chlorophenyl)-7H-pyrazolo[3,4-d]pyrimidin-6-yl)-5-(2,4-dichlorophenyl)-3-oxo-2,3-dihydro-1H-pyrazole-4-carboxylate (16).**

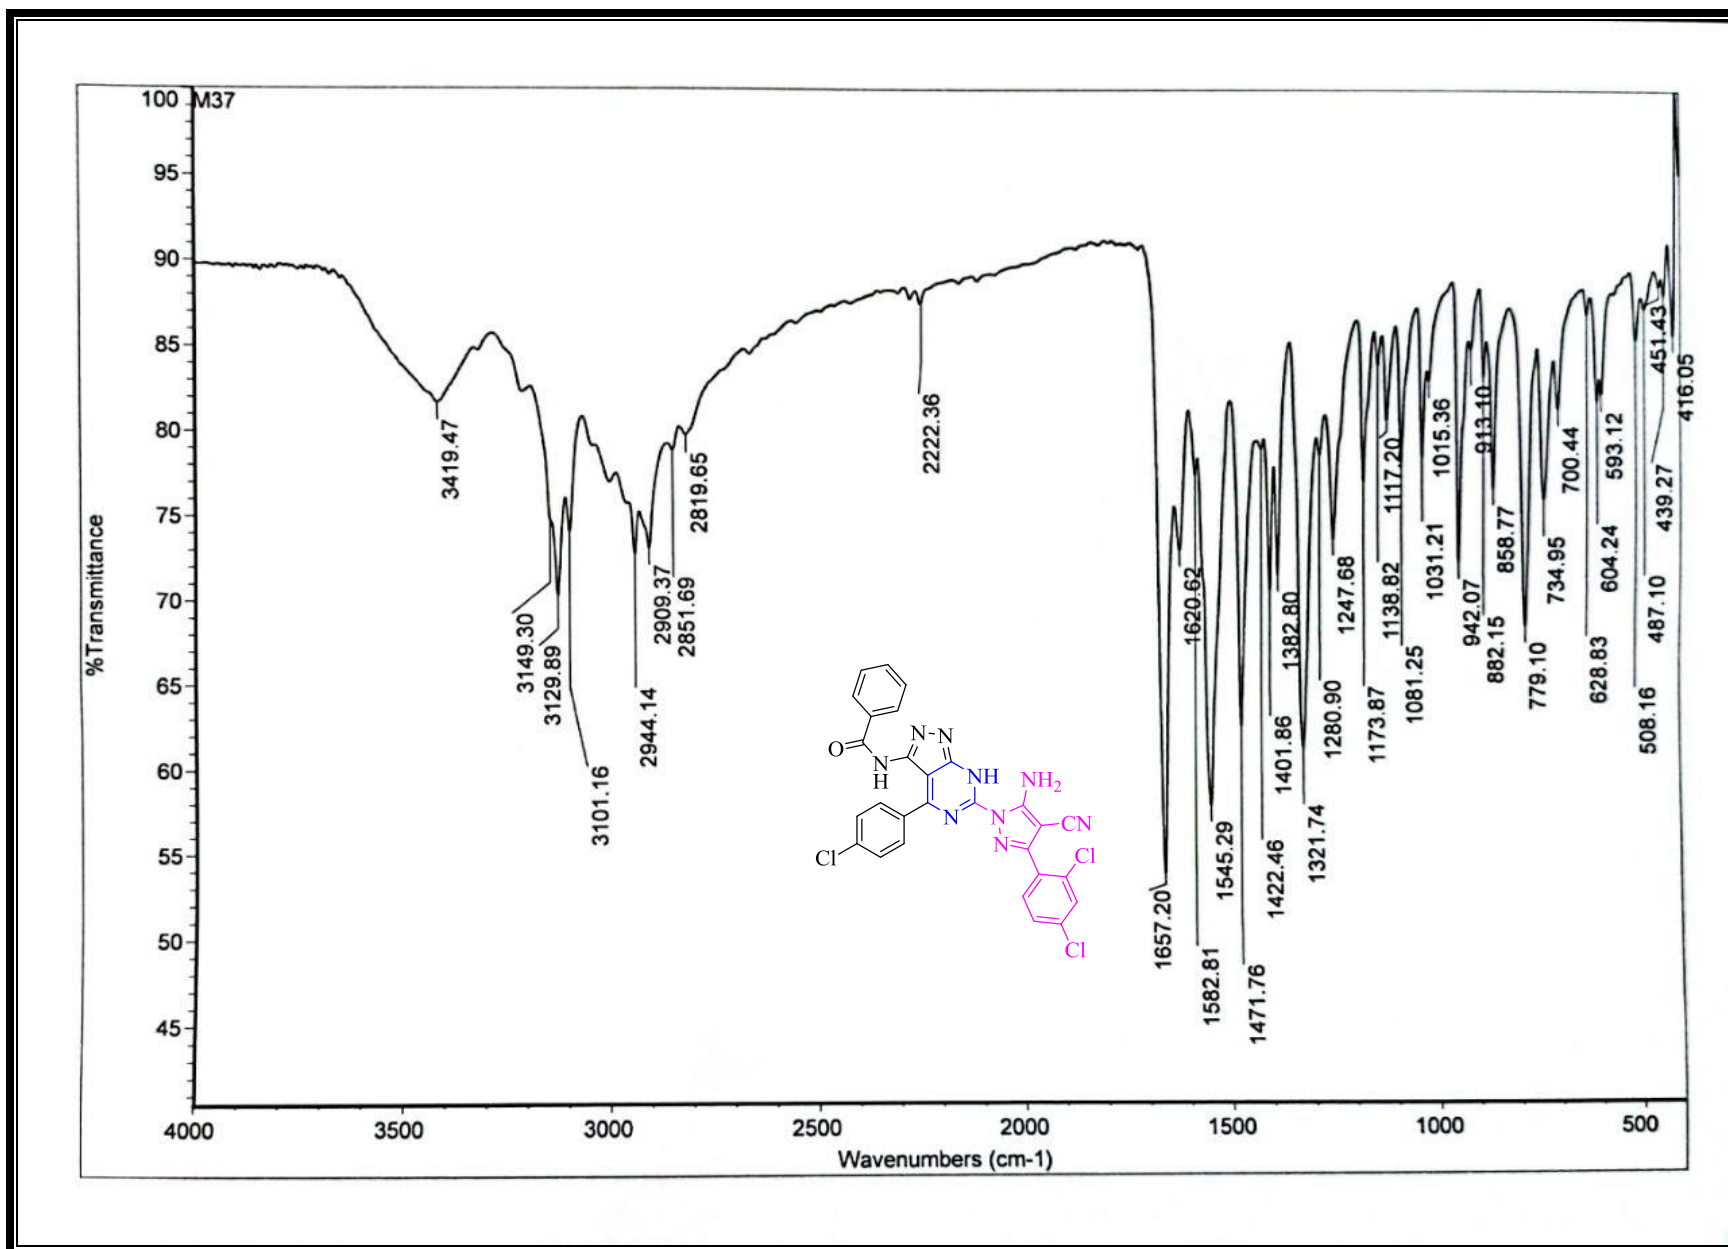

**IR of *N*-(6-(3-amino-4-cyano-5-(2,4-dichlorophenyl)-1*H*-pyrazol-1-yl)-4-(4-chlorophenyl)-7*H*-pyrazolo[3,4-*d*]pyrimidin-3-yl)benzamide (17).**

Paula Soliman\_H\_M37

Microanalytical Unit - FOPCU - NMR laboratory  
www.pharma.cu.edu.eg dir-mau.fopcu@pharma.cu.edu.eg

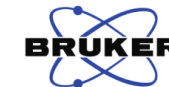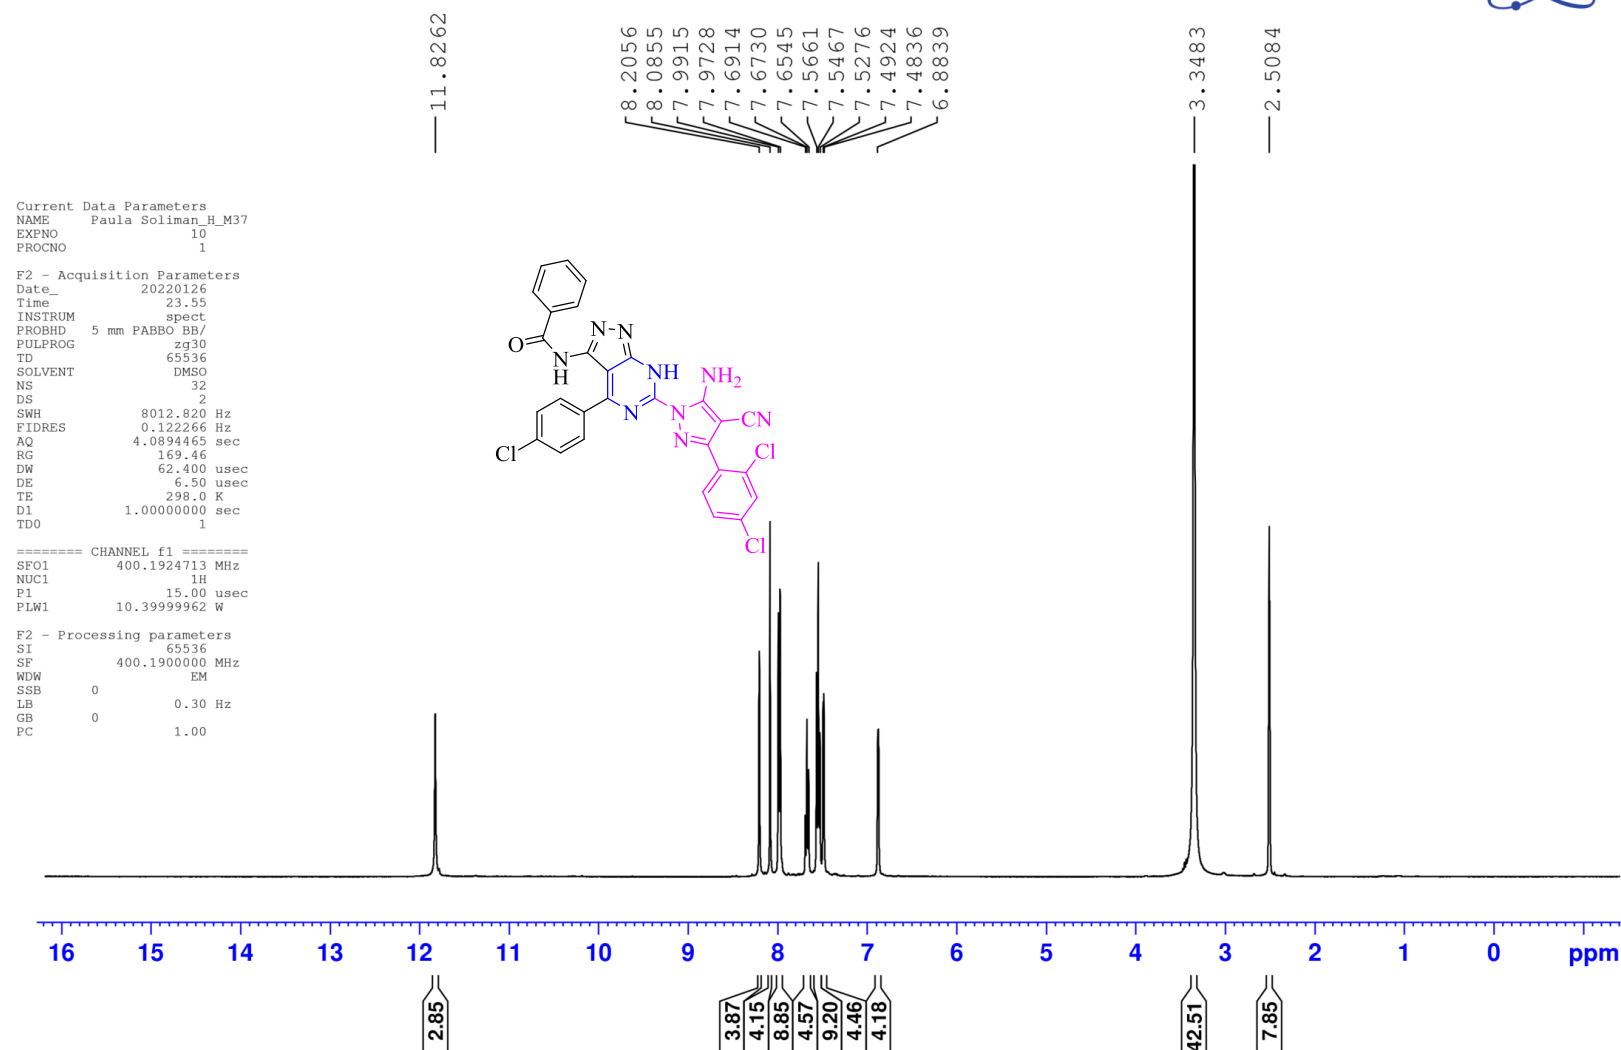

D<sub>2</sub>O of *N*-(6-(3-amino-4-cyano-5-(2,4-dichlorophenyl)-1H-pyrazol-1-yl)-4-(4-chlorophenyl)-7H-pyrazolo[3,4-*d*]pyrimidin-3-yl)benzamide (17).

Paula Soliman\_H\_M37\_D2O

Microanalytical Unit - FOPCU - NMR laboratory  
www.pharma.cu.edu.eg dir-mau.fopcu@pharma.cu.edu.eg

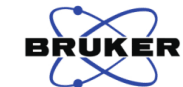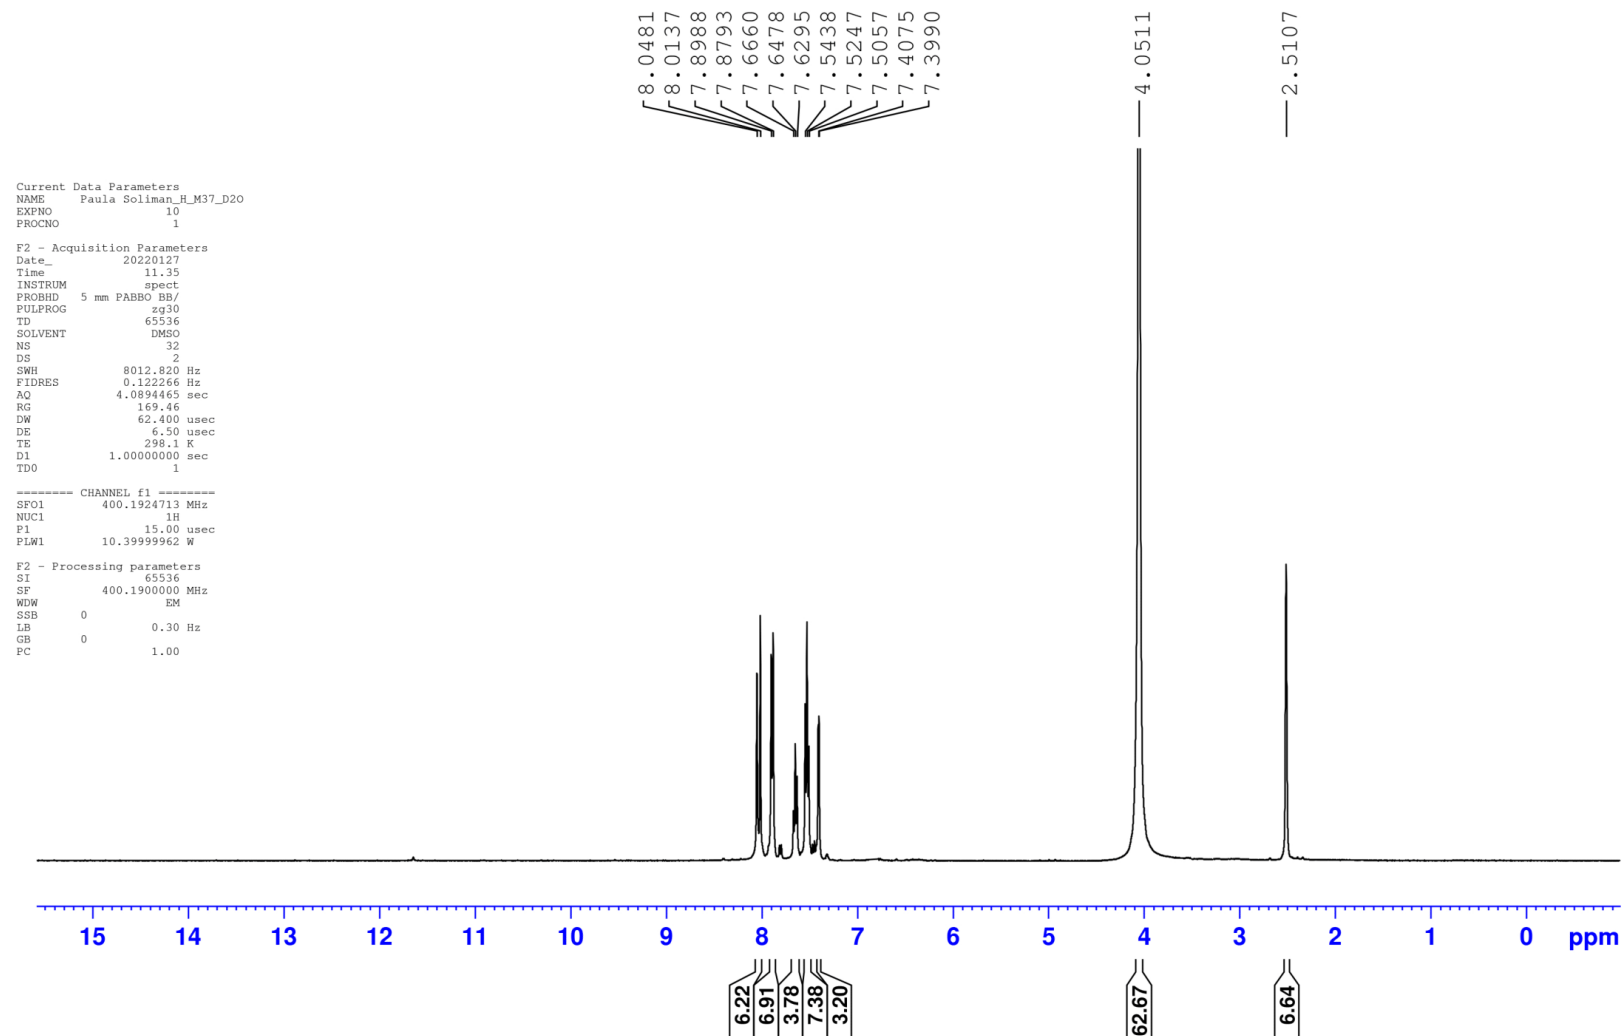

D<sub>2</sub>O of *N*-(6-(3-amino-4-cyano-5-(2,4-dichlorophenyl)-1*H*-pyrazol-1-yl)-4-(4-chlorophenyl)-7*H*-pyrazolo[3,4-*d*]pyrimidin-3-yl)benzamide (17).

Paula Soliman\_C\_M37

Microanalytical Unit - FOPCU - NMR laboratory  
www.pharma.cu.edu.eg dir-mau.fopcu@pharma.cu.edu.eg

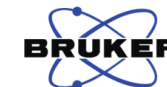

169.64  
166.99  
159.67  
152.43  
140.38  
134.65  
131.68  
130.00  
128.60  
126.10  
123.68  
123.32  
120.52  
117.04  
116.06  
109.42  
100.05  
68.90  
40.62  
40.41  
40.20  
39.99  
39.78  
39.57  
39.36

Current Data Parameters  
NAME Paula Soliman\_C\_M37  
EXPNO 10  
PROCNO 1

F2 - Acquisition Parameters  
Date\_ 20220127  
Time 09.49  
INSTRUM spect  
PROBHD 5 mm PABBO BB/  
PULPROG zgpg30  
TD 65536  
SOLVENT DMSO  
NS 1500  
DS 4  
SWH 24038.461 Hz  
FIDRES 0.366798 Hz  
AQ 1.3631488 sec  
RG 202.37  
DW 20.800 usec  
DE 6.50 usec  
TE 298.0 K  
D1 2.00000000 sec  
D11 0.03000000 sec  
TD0 1

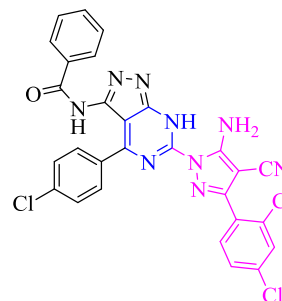

==== CHANNEL f1 =====  
SFO1 100.6379178 MHz  
NUC1 13C  
P1 10.00 usec  
PLW1 45.00000000 W  
==== CHANNEL f2 =====  
SFO2 400.1916008 MHz  
NUC2 1H  
CPDPRG[2] waltz16

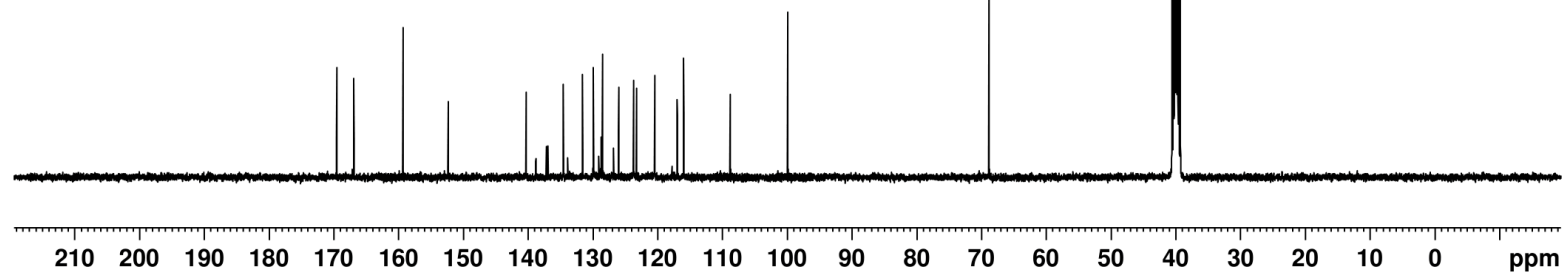

<sup>13</sup>C-NMR of *N*-(6-(3-amino-4-cyano-5-(2,4-dichlorophenyl)-1H-pyrazol-1-yl)-4-(4-chlorophenyl)-7H-pyrazolo[3,4-d]pyrimidin-3-yl)benzamide (17).



## 1.2. Impurity Profile

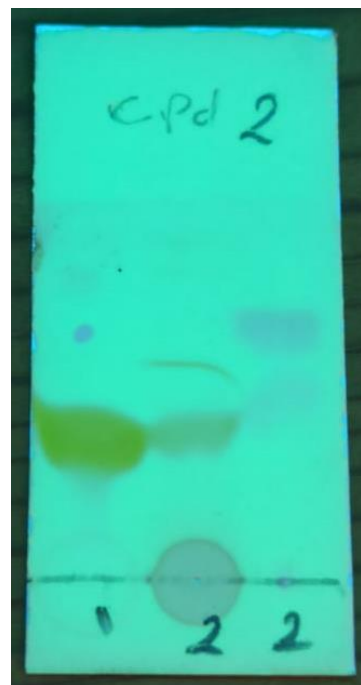

### TLC following up for synthesizing compound 2.

TLC (Thin Layer Chromatography) monitoring process for the synthesis of Compound 2.

TLC is a common technique used in organic chemistry to monitor the progress of a reaction and to check the purity of reaction mixtures.

#### Spot (1): Compound 1 reactant.

This is the starting material, Compound 1, before any reaction has taken place. It serves as a reference point to compare with subsequent spots.

#### Spot (2): After 1hr.

After 1 hour, we have a new spot on the TLC plate. This indicates the presence of a new compound formed during the reaction or a change in the starting material.

#### Spot (3): After reaction completion 3hr.

After 3 hours, we have another spot. This could indicate the formation of the desired Compound 2 or possibly other by-products. The movement of this spot on the TLC plate was provide information about the progress of the reaction and the purity of the final product.

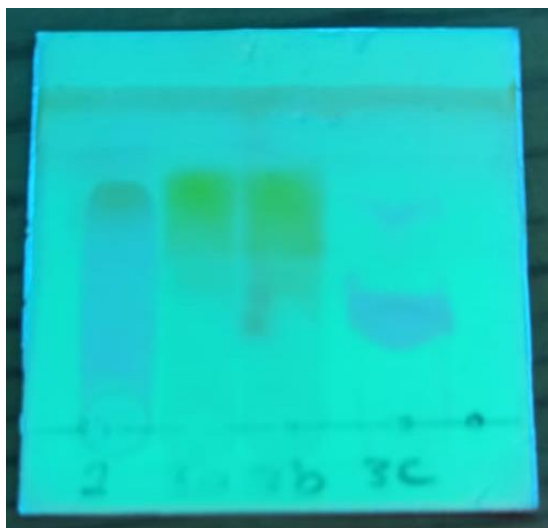

### **TLC following up for synthesizing compound 3.**

TLC (Thin Layer Chromatography) monitoring process for the synthesis of Compound 3.

#### **Spot (1): Compound 2 reactant.**

This is the starting material, Compound 2, before any reaction has taken place. It serves as a reference point to compare with subsequent spots.

#### **Spot (2): After 1hr.**

**After 1hr, there is no changing in reaction, but the color was changed.**

it suggested that there might be a transformation or reaction occurring in the mixture. The change in color could indicate the formation of an intermediate or a by-product that is not separated well on the TLC plate.

#### **Spot (3): After 2.5hr.**

After 2.5 hour, we have a new spot on the TLC plate. This indicates the presence of a new compound formed during the reaction or a change in the starting material.

#### **Spot (4): After reaction completion 5hr.**

After 5 hours, we have another spot. This could indicate the formation of the desired Compound 3 or possibly other by-products. The movement of this spot on the TLC plate was provide information about the progress of the reaction and the purity of the final product.

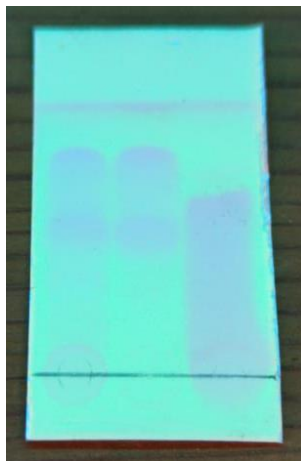

**TLC following up for synthesizing compound 10.**

TLC (Thin Layer Chromatography) monitoring process for the synthesis of Compound 10.

**Spot (1): Compound 7 reactant.**

This is the starting material, Compound 7, before any reaction has taken place. It serves as a reference point to compare with subsequent spots.

**Spot (2): After 30 min.**

After 0.5 hour, we have not any new spot on the TLC plate.

**Spot (3): After reaction completion 1.5hr.**

After 3 hours, we have another spot. This could indicate the formation of the desired Compound 10 or possibly other by-products. The movement of this spot on the TLC plate was provide information about the progress of the reaction and the purity of the final product.

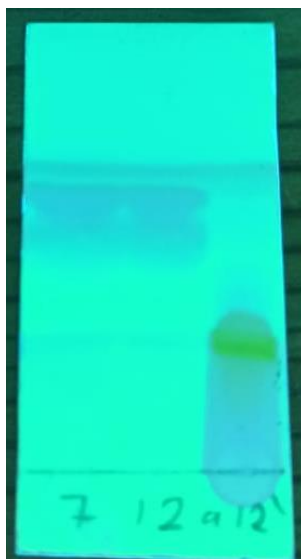

**TLC following up for synthesizing compound 12.**

TLC (Thin Layer Chromatography) monitoring process for the synthesis of Compound 12.

**Spot (1): Compound 7 reactant.**

This is the starting material, Compound 7, before any reaction has taken place. It serves as a reference point to compare with subsequent spots.

**Spot (2): After 4hr.**

After 4 hours, we have not any new spot on the TLC plate.

**Spot (3): After reaction completion 15hr.**

After 15 hours, we have another spot and changing in color. This could indicate the formation of the desired Compound 12 or possibly other by-products. The movement of this spot on the TLC plate was provide information about the progress of the reaction and the purity of the final product.

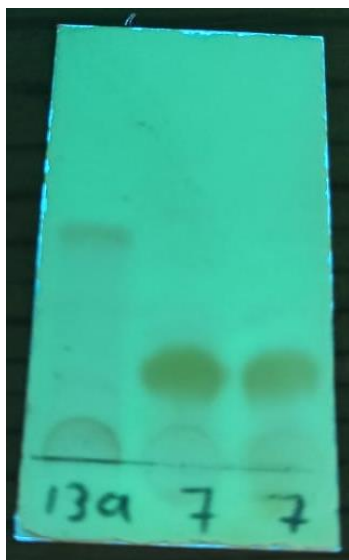

### TLC following up for synthesizing compound 13a.

TLC (Thin Layer Chromatography) monitoring process for the synthesis of Compound 13a.

#### Spot (1): Compound 7 reactant.

This is the starting material, Compound 7, before any reaction has taken place. It serves as a reference point to compare with subsequent spots.

#### Spot (2): After 1hr.

After 1hr, there is no changing in reaction, but the color was changed.

it suggested that there might be a transformation or reaction occurring in the mixture. The change in color could indicate the formation of an intermediate or a by-product that is not separated well on the TLC plate.

#### Spot (3): After reaction completion 3hr.

After 3 hours, we have another spot and changing in color. This could indicate the formation of the desired Compound 13a or possibly other by-products. The movement of this spot on the TLC plate was provide information about the progress of the reaction and the purity of the final product.

## 2. Biological Evaluation

### 2.1. Results of in-vitro primary single dose (10 $\mu$ M) full NCI 60 cell panel assay

Table S1: *In vitro* NCI 60 cell line anticancer screening results of compounds (2-17) at single dose of 10  $\mu$ M presented as percent cell growth promotion.

| Panel/Cell Line                   | 2      | 3      | 4      | 5      | 6      | 7      | 8      | 9      | 10     | 12     | 13a    | 13b    | 13c    | 14     | 15     | 16     | 17     |
|-----------------------------------|--------|--------|--------|--------|--------|--------|--------|--------|--------|--------|--------|--------|--------|--------|--------|--------|--------|
| <b>Leukemia</b>                   |        |        |        |        |        |        |        |        |        |        |        |        |        |        |        |        |        |
| CCRF-CEM                          | 94.83  | 98.69  | 23.29  | 98.53  | 93.09  | 92.90  | 91.31  | 90.33  | 96.13  | 101.27 | 97.83  | 87.17  | 96.28  | 88.09  | 30.10  | 22.60  | 106.80 |
| HL-60(TB)                         | 96.07  | 100.71 | 31.92  | 93.69  | 94.10  | 92.51  | 93.19  | 101.91 | 98.02  | 116.88 | 101.08 | 101.67 | 111.51 | 86.24  | 7.37   | 5.63   | 124.44 |
| K-562                             | 97.62  | 99.49  | 26.48  | 82.62  | 87.33  | 98.76  | 87.44  | 90.78  | 100.26 | 100.16 | 104.53 | 89.52  | 93.99  | 96.74  | 12.36  | 11.14  | 95.51  |
| MOLT-4                            | 99.99  | 105.81 | 32.81  | 99.48  | 99.11  | 106.99 | 100.82 | 105.01 | 107.09 | 103.25 | 107.67 | 94.76  | 97.39  | 95.53  | 20.53  | 2.13   | 102.78 |
| RPMI-8226                         | 96.30  | 93.31  | 44.42  | 82.25  | 91.81  | 96.54  | 92.04  | 84.29  | 93.25  | 102.22 | 95.01  | 89.10  | 96.03  | 89.71  | 33.50  | 18.74  | 89.84  |
| SR                                | 91.60  | 86.05  | 18.16  | 84.90  | 83.15  | 90.92  | 75.24  | 87.02  | 89.30  | 101.38 | 67.82  | 85.36  | 94.11  | 88.85  | 25.67  | 7.20   | 85.43  |
| <b>Non-Small Cell Lung Cancer</b> |        |        |        |        |        |        |        |        |        |        |        |        |        |        |        |        |        |
| A549/ATCC                         | 96.74  | 107.60 | 57.21  | 105.81 | 103.64 | 102.29 | 96.48  | 109.95 | 102.91 | 100.71 | 104.21 | 103.13 | 93.11  | 82.97  | 24.58  | 7.56   | 96.54  |
| EKVX                              | 92.70  | 88.97  | 53.79  | 100.14 | 93.30  | 104.04 | 98.39  | 101.98 | 94.95  | 97.94  | 93.87  | 98.49  | 95.31  | 84.89  | 33.37  | 10.76  | 95.23  |
| HOP-62                            | 94.66  | 85.55  | 31.12  | 89.52  | 81.17  | 95.54  | 64.56  | 101.37 | 97.03  | 101.85 | 96.74  | 85.54  | 98.05  | 100.72 | 3.58   | 18.76  | 102.92 |
| HOP-92                            | 90.41  | 85.52  | 57.19  | 109.22 | -95.03 | 94.90  | 86.33  | 119.49 | 98.20  | 101.99 | 75.56  | 106.45 | 93.70  | 91.32  | 56.77  | 32.34  | 131.97 |
| NCI-H226                          | 85.25  | 79.08  | 23.77  | 91.05  | 100.46 | 108.85 | 105.79 | 106.79 | 94.00  | 93.67  | 91.42  | 94.47  | 93.79  | 88.56  | 19.84  | 32.16  | 100.40 |
| NCI-H23                           | 96.86  | 97.22  | 58.58  | 94.27  | 97.18  | 99.99  | 88.54  | 100.09 | 94.95  | 102.42 | 94.01  | 101.05 | 102.17 | 90.23  | 1.50   | -7.61  | 100.05 |
| NCI-H322M                         | 101.11 | 98.93  | 40.04  | 96.60  | 98.84  | 98.93  | 98.62  | 108.20 | 100.81 | 95.94  | 106.85 | 91.73  | 80.29  | 89.01  | 29.53  | 24.98  | 90.32  |
| NCI-H460                          | 99.15  | 99.35  | 15.80  | 97.54  | 114.75 | 99.95  | 111.61 | 110.25 | 107.98 | 104.77 | 83.25  | 91.98  | 98.32  | 93.32  | 6.93   | 4.04   | 93.04  |
| NCI-H522                          | 104.48 | 92.01  | 13.23  | 73.34  | 92.57  | 95.30  | 94.71  | 47.89  | 105.75 | 90.58  | 76.48  | 93.50  | 88.74  | 82.72  | -9.93  | -30.52 | 99.02  |
| <b>Colon Cancer</b>               |        |        |        |        |        |        |        |        |        |        |        |        |        |        |        |        |        |
| COLO 205                          | 122.30 | 126.57 | 115.51 | 99.18  | N/A    | N/A    | N/A    | N/A    | N/A    | 11.12  | N/A    | 119.94 | 124.17 | 103.43 | -36.06 | -62.28 | 126.27 |
| HCC-2998                          | 98.77  | 87.10  | 54.12  | 94.24  | 107.34 | 107.13 | 109.22 | 115.43 | 108.45 | 102.64 | 92.99  | 112.81 | 102.70 | 96.22  | 3.16   | -5.78  | 108.53 |
| HCT-116                           | 99.08  | 98.77  | 38.32  | 99.26  | 97.35  | 98.83  | 92.71  | 101.24 | 94.82  | 98.26  | 84.77  | 88.28  | 100.11 | 100.33 | 9.09   | -19.42 | 114.28 |
| HT29                              | 97.81  | 100.90 | 31.74  | 89.18  | 99.99  | 101.83 | 95.72  | 90.85  | 101.89 | 100.02 | 96.02  | 81.15  | 89.80  | 69.26  | 16.72  | -29.73 | 87.90  |
| KM12                              | 104.66 | 99.79  | 49.25  | 109.24 | 112.25 | 105.22 | 117.20 | 118.60 | 110.67 | 101.75 | 75.73  | 108.21 | 113.56 | 86.65  | 13.25  | 0.19   | 104.59 |
|                                   | 98.46  | 99.34  | 39.89  | 100.26 | 100.10 | 100.33 | 97.87  | 104.51 | 99.12  | 105.35 | 96.53  | 99.97  | 101.77 | 82.91  | 27.56  | -6.67  | 91.89  |
|                                   | 102.58 | 100.91 | 48.91  | 96.40  | 105.09 | 106.80 | 106.16 | 105.66 | 101.45 | 101.55 | 95.15  | 96.99  | 101.44 | 96.95  | 22.91  | 4.14   | 115.86 |

| <b>SW-620</b>                 |        |        |       |        |        |        |        |        |        |        |        |        |        |        |        |        |        |
|-------------------------------|--------|--------|-------|--------|--------|--------|--------|--------|--------|--------|--------|--------|--------|--------|--------|--------|--------|
| <b><u>CNS Cancer</u></b>      |        |        |       |        |        |        |        |        |        |        |        |        |        |        |        |        |        |
| <b>SF-268</b>                 | 92.78  | 92.82  | 42.17 | 97.39  | 101.14 | 109.39 | 102.95 | 115.73 | 100.95 | 95.36  | 98.10  | 92.69  | 93.17  | 89.88  | 38.66  | 23.77  | 95.90  |
| <b>SF-295</b>                 | 101.73 | 91.93  | 50.97 | 94.77  | 96.18  | 102.91 | 79.18  | 102.28 | 101.57 | 92.09  | 77.21  | 94.46  | 91.01  | 86.43  | -13.87 | 16.19  | 98.58  |
| <b>SF-539</b>                 | 94.69  | 96.21  | 46.40 | 93.99  | 91.46  | 96.38  | 85.37  | 101.85 | 96.76  | 92.70  | 87.68  | 92.91  | 94.70  | 93.28  | -63.68 | -4.38  | 92.81  |
| <b>SNB-19</b>                 | 95.31  | 94.30  | 32.65 | 91.18  | 85.25  | 93.80  | 75.64  | 89.33  | 92.11  | 94.16  | 86.94  | 91.59  | 90.49  | 93.83  | 31.06  | N/A    | 93.68  |
| <b>SNB-75</b>                 | 68.54  | 63.79  | 50.42 | 84.72  | 95.26  | 92.24  | 89.00  | 110.12 | 82.92  | N/A    | 48.37  | N/A    | N/A    | N/A    | N/A    | 29.18  | N/A    |
| <b>U251</b>                   | 106.76 | 108.54 | 48.70 | 102.25 | 96.68  | 96.84  | 72.78  | 103.09 | 101.00 | 98.14  | 87.92  | 81.65  | 93.06  | 92.89  | 6.80   | 2.68   | 98.32  |
| <b><u>Prostate Cancer</u></b> |        |        |       |        |        |        |        |        |        |        |        |        |        |        |        |        |        |
| <b>PC-3</b>                   | 92.80  | 100.67 | 64.50 | 104.19 | 76.29  | 91.66  | 94.23  | 101.31 | 100.60 | 96.44  | 93.79  | 104.03 | 96.90  | 88.28  | 6.40   | -11.29 | 110.58 |
| <b>DU-145</b>                 | 100.21 | 101.08 | 57.23 | 99.76  | 106.08 | 103.18 | 100.37 | 105.62 | 102.59 | 110.21 | 106.16 | 103.32 | 102.74 | 88.08  | 7.01   | 25.71  | 102.24 |
| <b><u>Melanoma</u></b>        |        |        |       |        |        |        |        |        |        |        |        |        |        |        |        |        |        |
| <b>LOX IMVI</b>               | 103.64 | 109.00 | 42.53 | 86.93  | 104.68 | 113.53 | 111.35 | 118.10 | 120.02 | 102.68 | 102.28 | 86.82  | 99.19  | 64.62  | 5.24   | -98.48 | 100.58 |
| <b>MALME-3M</b>               | 89.06  | 92.15  | 77.76 | 85.07  | 92.71  | 98.52  | 98.52  | 96.01  | 93.51  | 99.02  | 77.76  | 90.10  | 97.01  | 78.85  | 13.66  | -26.04 | 101.81 |
| <b>M14</b>                    | 100.84 | 104.34 | 58.48 | 98.30  | 96.79  | 101.63 | 106.98 | 101.24 | 99.56  | 106.99 | 68.24  | 91.77  | 103.38 | 99.11  | -3.96  | -43.66 | 110.64 |
| <b>MDA-MB-435</b>             | 100.22 | 101.16 | 56.43 | 98.75  | 102.63 | 103.18 | 103.14 | 103.52 | 100.51 | 99.74  | 60.00  | 99.03  | 97.31  | 91.58  | -44.38 | -19.82 | 98.92  |
| <b>SK-MEL-2</b>               | 107.90 | 104.91 | 68.94 | 106.88 | 107.49 | 114.78 | 107.52 | 114.65 | 112.83 | N/A    | 86.36  | N/A    | N/A    | N/A    | N/A    | N/A    | N/A    |
| <b>SK-MEL-28</b>              | 104.18 | 109.73 | 48.12 | 101.54 | 105.62 | 105.67 | 117.02 | 110.59 | 111.47 | 108.39 | 104.33 | 92.56  | 96.21  | 101.18 | 53.82  | 14.35  | 111.46 |
| <b>SK-MEL-5</b>               | 96.17  | 96.28  | 45.80 | 97.12  | 98.91  | 101.48 | 97.35  | 100.14 | 97.72  | 98.29  | 87.86  | 97.39  | 78.50  | 85.74  | 0.62   | -98.61 | 99.78  |
| <b>UACC-257</b>               | 106.34 | 104.22 | 92.43 | 105.68 | 98.82  | 103.24 | 104.92 | 106.74 | 101.95 | 101.90 | 85.19  | 98.17  | 98.83  | 95.90  | 69.66  | 20.20  | 101.52 |
| <b>UACC-62</b>                | 101.15 | 99.07  | 34.05 | 92.36  | 94.17  | 102.03 | 93.48  | 105.00 | 102.19 | 92.41  | 76.79  | 81.08  | 77.80  | 66.26  | 30.11  | 14.34  | 82.10  |
| <b><u>Ovarian Cancer</u></b>  |        |        |       |        |        |        |        |        |        |        |        |        |        |        |        |        |        |
| <b>IGROV1</b>                 | 107.22 | 94.63  | 40.42 | 92.51  | 103.69 | 100.11 | 97.46  | 108.76 | 118.34 | 107.33 | 114.60 | 109.70 | 98.36  | 105.25 | 26.52  | 21.89  | 79.48  |
| <b>OVCAR-3</b>                | 103.53 | 104.06 | 43.93 | 100.18 | 112.27 | 116.73 | 118.44 | 117.20 | 109.37 | 99.52  | 119.45 | 88.82  | 83.64  | 92.11  | 13.52  | 22.67  | 86.29  |
| <b>OVCAR-4</b>                | 100.29 | 99.72  | 50.29 | 94.24  | 94.57  | 99.87  | 96.78  | 95.36  | 96.94  | 95.85  | 107.35 | 105.40 | 103.92 | 110.87 | 24.85  | 11.33  | 124.63 |
| <b>OVCAR-5</b>                | 108.44 | 101.17 | 66.28 | 101.03 | 108.97 | 103.51 | 116.32 | 124.46 | 121.99 | 107.66 | 119.50 | 98.34  | 99.65  | 95.47  | 11.08  | 16.48  | 104.56 |
| <b>OVCAR-8</b>                | 103.71 | 99.82  | 44.43 | 101.87 | 98.76  | 106.16 | 91.58  | 105.53 | 107.40 | 106.60 | 102.37 | 77.28  | 102.05 | 89.60  | -23.25 | -29.69 | 109.59 |
| <b>SK-OV-3</b>                | 105.38 | 94.69  | 53.65 | 94.55  | 82.59  | 108.44 | 99.27  | 108.33 | 103.02 | 98.01  | 110.38 | 108.15 | 97.84  | 100.62 | -5.94  | 19.95  | 122.91 |
| <b><u>Renal Cancer</u></b>    |        |        |       |        |        |        |        |        |        |        |        |        |        |        |        |        |        |
| <b>786-0</b>                  | 99.74  | 98.38  | 53.59 | 100.76 | 95.31  | 98.47  | 72.41  | 103.37 | 96.85  | 103.31 | 96.19  | 101.95 | 97.92  | 9187   | 2.33   | 7.00   | 108.46 |
| <b>A498</b>                   | 97.35  | 107.99 | 78.80 | 108.37 | 117.20 | 114.49 | 100.97 | 106.14 | 110.45 | 107.21 | 119.30 | 114.54 | 92.09  | 90.13  | 79.21  | 72.50  | 121.58 |
| <b>ACHN</b>                   | 96.67  | 98.73  | 40.45 | 100.60 | 95.15  | 108.39 | 78.81  | 107.17 | 104.39 | 100.49 | 99.37  | 98.74  | 91.99  | 86.67  | 30.39  | 12.53  | 103.15 |
| <b>CAKI-1</b>                 | 91.05  | 83.81  | 42.20 | 90.47  | 73.15  | 93.81  | 74.07  | 89.09  | 89.14  | 90.66  | 73.94  | 90.95  | 97.65  | 67.05  | 23.90  | 13.72  | 92.68  |
| <b>RXF 393</b>                | 90.88  | 99.21  | 60.61 | 119.24 | 101.47 | 99.66  | 87.59  | 105.02 | 97.16  | 101.35 | 102.77 | 99.76  | 84.07  | 96.81  | -35.47 | -13.52 | 101.96 |
| <b>SN12C</b>                  | 100.19 | 96.56  | 41.15 | 97.91  | 92.38  | 92.59  | 97.13  | 103.53 | 104.12 | 95.28  | 92.42  | 91.64  | 87.09  | 85.07  | 32.54  | -17.37 | 95.19  |
| <b>TK-10</b>                  | 111.70 | 153.37 | 51.69 | 125.43 | 117.29 | 138.75 | 119.03 | 111.54 | 120.34 | 103.45 | 115.33 | 108.56 | 101.92 | 106.30 | 56.23  | 64.00  | 115.88 |
| <b>UO-31</b>                  | 90.47  | 89.92  | 29.60 | 83.88  | 64.68  | 87.99  | 91.27  | 82.24  | 88.29  | 94.00  | 75.46  | 87.58  | 80.19  | 76.65  | 24.46  | 17.31  | 95.86  |

| <b>Breast Cancer</b> |       |       |       |       |        |        |        |        |        |        |        |        |        |         |               |               |               |
|----------------------|-------|-------|-------|-------|--------|--------|--------|--------|--------|--------|--------|--------|--------|---------|---------------|---------------|---------------|
| MCF7                 | 91.49 | 76.58 | 52.11 | 92.64 | 96.19  | 96.76  | 84.28  | 89.01  | 91.37  | 91.32  | 88.21  | 88.85  | 58.32  | 82.43   | 16.66         | <b>0.67</b>   | 16.51         |
| MDA-MB 231/ATCC      | 91.26 | 86.07 | 53.75 | 93.92 | 80.10  | 77.04  | 67.92  | 94.26  | 96.33  | 101.89 | 74.22  | 106.69 | 94.23  | 72.00   | <b>-20.77</b> | <b>-4.05</b>  | 86.28         |
| HS 578T              | 96.37 | 89.15 | 58.21 | 92.60 | 86.73  | 95.88  | 74.01  | 101.05 | 97.55  | 93.77  | 79.95  | 93.59  | 70.46  | 90.47   | <b>-0.63</b>  | 17.55         | 90.40         |
| BT-549               | N/A   | N/A   | N/A   | N/A   | N/A    | N/A    | N/A    | N/A    | N/A    | 104.29 | N/A    | 99.47  | 100.35 | 118.95. | 33.47         | 27.07         | 120.88        |
| T-47D                | 98.15 | 76.23 | 48.83 | 89.21 | 82.52  | 97.21  | 89.56  | 97.61  | 100.40 | 95.87  | 82.28  | 102.42 | 84.32  | 79.14   | 24.07         | <b>7.66</b>   | 74.02         |
| MDA-MBA-468          | 91.65 | 97.02 | 46.12 | 96.77 | 100.38 | 118.11 | 106.25 | 120.31 | 100.53 | 96.49  | 101.68 | 92.87  | 72.00  | 99.03   | <b>-36.27</b> | <b>-21.38</b> | <b>-12.76</b> |
| <b>Mean</b>          | 98.21 | 97.40 | 47.92 | 96.62 | 93.18  | 101.29 | 94.86  | 102.81 | 101.25 | 100.27 | 92.06  | 96.21  | 93.96  | 90.12   | <b>13.44</b>  | <b>2.30</b>   | 98.35         |

\* Results are presented as percent cell growth promotion.

\* Values less than 10% growth promotion are presented in bold.

## 2.2. Five Doses

Table S2: *In vitro* NCI 5 log dose results for compounds (15 and 16) in  $\mu$ M against 60 cell panel.

| Panel                             | Cell Line        | Compound 15      |           |                  | Compound 16      |           |                  |
|-----------------------------------|------------------|------------------|-----------|------------------|------------------|-----------|------------------|
|                                   |                  | GI <sub>50</sub> | TGI       | LC <sub>50</sub> | GI <sub>50</sub> | TGI       | LC <sub>50</sub> |
| <b>Leukemia</b>                   | <b>CCRF-CEM</b>  | 3.58             | 3.28      | >100             | 2.60             | 1.09      | >100             |
|                                   | <b>HL-60(TB)</b> | 2.74             | 8.88      | >100             | 2.76             | 1.12      | >100             |
|                                   | <b>K-562</b>     | 3.79             | >100      | >100             | 2.76             | >100      | >100             |
|                                   | <b>MOLT-4</b>    | 5.03             | >100      | >100             | 2.54             | 8.36      | >100             |
|                                   | <b>RPMI-8226</b> | 7.20             | 2.69      | >100             | 3.65             | 2.40      | >100             |
|                                   | <b>SR</b>        | 3.26             | 2.80      | >100             | 2.47             | 9.23      | >100             |
| <b>Non-Small Cell Lung Cancer</b> | <b>A549/ATCC</b> | <b>9.63</b>      | >100      | >100             | 4.62             | 2.20      | 8.29             |
|                                   | <b>EKVX</b>      | <b>8.44</b>      | 3.06      | >1005.           | 3.01             | 1.24      | 3.97             |
|                                   | <b>HOP-62</b>    | <b>5.14</b>      | 1.21      | 00               | 6.99             | 2.29      | 5.96             |
|                                   | <b>HOP-92</b>    | <b>ND</b>        | <b>ND</b> | <b>ND</b>        | <b>ND</b>        | <b>ND</b> | <b>ND</b>        |
|                                   | <b>NCI-H226</b>  | <b>3.17</b>      | 3.58      | >100             | 9.98             | 2.71      | 7.36             |
|                                   | <b>NCI-H23</b>   | <b>1.18</b>      | 2.18      | >100             | 3.27             | 1.33      | 4.10             |
|                                   | <b>NCI-H322M</b> | <b>2.40</b>      | 2.71      | >100             | 5.30             | 1.83      | 4.35             |
|                                   | <b>NCI-H460</b>  | <b>3.92</b>      | 1.16      | 8.76             | 4.54             | 1.59      | 4.91             |
|                                   | <b>NCI-H522</b>  | <b>1.89</b>      | 4.97      | >100             | 2.12             | 5.99      | 2.88             |
| <b>Colon Cancer</b>               | <b>COLO 205</b>  | 5.251.           | 3.69      | >100             | 4.02             | 1.67      | 5.25             |
|                                   | <b>HCC-2998</b>  | 11               | 1.53      | >100             | 3.97             | 1.52      | 4.33             |
|                                   | <b>HCT-116</b>   | 4.30             | 1.50      | >100             | 3.92             | 1.68      | 5.30             |
|                                   | <b>HCT-15</b>    | 4.18             | 1.95      | >100             | 2.86             | 1.21      | 4.09             |
|                                   | <b>HT29</b>      | 3.83             | 2.38      | 4.75             | 3.48             | 1.40      | 7.79             |
|                                   | <b>KM12</b>      | 4.72             | >100      | >100             | 3.40             | 1.29      | 3.73             |
|                                   | <b>SW-620</b>    | 3.63             | 4.62      | >100             | 3.33             | 1.31      | 4.50             |
| <b>CNS Cancer</b>                 | <b>SF-268</b>    | 6.95             | 2.16      | >100             | 6.98             | 2.07      | 4.88             |
|                                   | <b>SF-295</b>    | 3.88             | 3.43      | 4.80             | 4.77             | 1.70      | 4.37             |
|                                   | <b>SF-539</b>    | 3.82             | 1.86      | 1.47             | 6.85             | 2.00      | 4.60             |
|                                   | <b>SNB-19</b>    | 5.19             | 2.27      | >100             | 8.31             | 2.12      | 4.79             |
|                                   | <b>SNB-75</b>    | 2.00             | 1.01      | 3.85             | 2.77             | 1.50      | 4.68             |
|                                   | <b>U251</b>      | 5.38             | 1.97      | >100             | 5.20             | 2.15      | 6.60             |



|                        |                    |             |      |      |      |      |      |
|------------------------|--------------------|-------------|------|------|------|------|------|
| <b>Melanoma</b>        | <b>LOX IMVI</b>    | 4.79        | 1.42 | 4.70 | 3.43 | 1.39 | 4.03 |
|                        | <b>MALME-3M</b>    | 6.06        | 1.50 | >100 | 2.93 | 1.31 | 3.81 |
|                        | <b>M14</b>         | 3.88        | 1.26 | >100 | 3.61 | 1.53 | 5.03 |
|                        | <b>MDA-MB-435</b>  | 2.03        | 4.88 | 2.13 | 2.06 | 4.52 | 9.91 |
|                        | <b>SK-MEL-2</b>    | 5.05        | 1.26 | >100 | 2.58 | 7.75 | 4.69 |
|                        | <b>SK-MEL-28</b>   | 7.99        | >100 | >100 | 7.01 | 2.02 | 4.58 |
|                        | <b>SK-MEL-5</b>    | 4.24        | 9.51 | >100 | 4.21 | 1.54 | 3.97 |
|                        | <b>UACC-257</b>    | 2.18        | >100 | >100 | 1.05 | 2.53 | 6.10 |
|                        | <b>UACC-62</b>     | 3.39        | 7.29 | >100 | 3.72 | 1.59 | 4.13 |
| <b>Ovarian Cancer</b>  | <b>IGROV1</b>      | 6.87        | 2.44 | >100 | 4.77 | 1.79 | 4.69 |
|                        | <b>OVCAR-3</b>     | 3.94        | 1.57 | 4.91 | 4.25 | 1.51 | 4.01 |
|                        | <b>OVCAR-4</b>     | 2.28        | 6.79 | >100 | 6.67 | 2.09 | 5.05 |
|                        | <b>OVCAR-5</b>     | 1.59        | 2.68 | >100 | 6.52 | 2.06 | 4.68 |
|                        | <b>OVCAR-8</b>     | 1.03        | 7.13 | >100 | 6.34 | 2.62 | 9.19 |
|                        | <b>NCI/ADR-RES</b> | 2.82        | 8.87 | >100 | 2.52 | 8.13 | 3.42 |
|                        | <b>SK-OV-3</b>     | 4.30        | 1.19 | 7.10 | 3.00 | 1.25 | 3.91 |
| <b>Renal Cancer</b>    | <b>786-0</b>       | 5.90        | 1.32 | >100 | 1.08 | 2.48 | 5.70 |
|                        | <b>A498</b>        | 1.07        | 4.83 | >100 | 1.05 | 2.35 | 5.25 |
|                        | <b>ACHN</b>        | 7.68        | 2.88 | >100 | 4.86 | 1.71 | 4.15 |
|                        | <b>CAKI-1</b>      | 6.27        | 1.58 | 6.68 | 2.33 | 1.35 | 3.89 |
|                        | <b>RXF 393</b>     | 8.10        | 3.93 | 2.71 | 3.96 | 1.78 | 5.84 |
|                        | <b>SN12C</b>       | 7.20        | 1.53 | 5.31 | 3.05 | 1.25 | 3.69 |
|                        | <b>TK-10</b>       | 6.32        | 3.24 | >100 | 1.20 | 2.88 | 6.90 |
|                        | <b>UO-31</b>       | 6.11        | 2.39 | >100 | 2.98 | 1.35 | 3.68 |
| <b>Prostate Cancer</b> | <b>PC-3</b>        | <b>5.36</b> | 2.80 | >100 | 2.92 | 1.58 | >100 |
|                        | <b>DU-145</b>      | <b>1.65</b> | 1.22 | 4.39 | 8.09 | 2.11 | 4.88 |

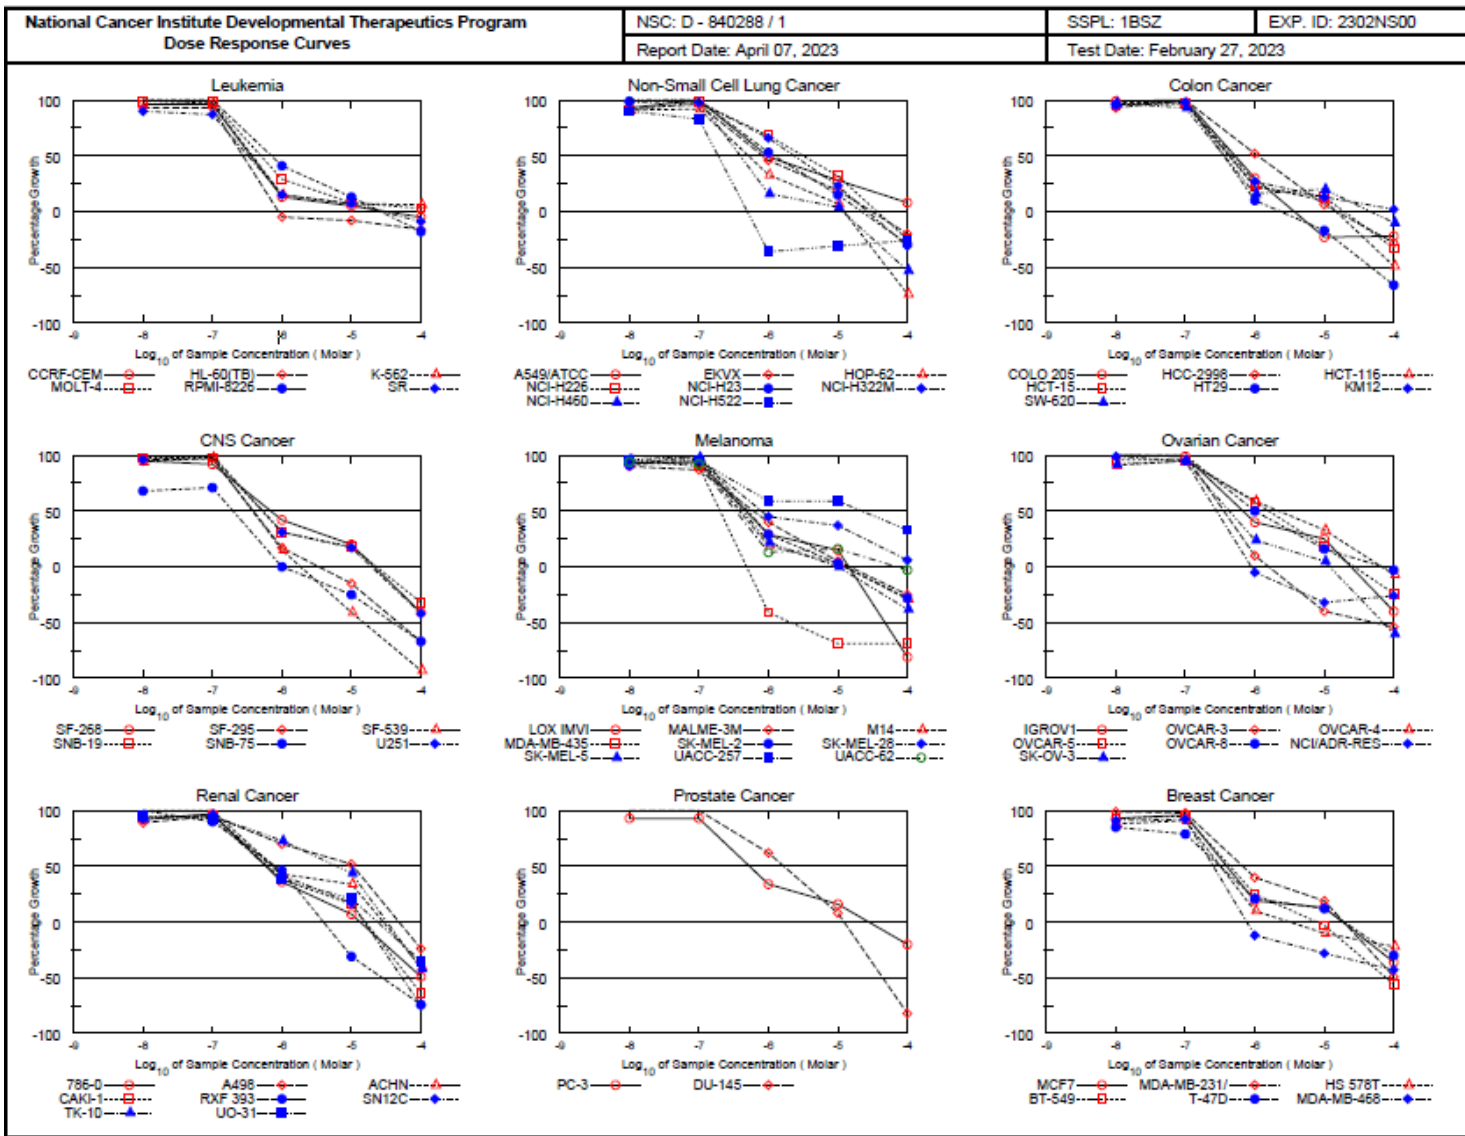

Dose response curve for compound 15.

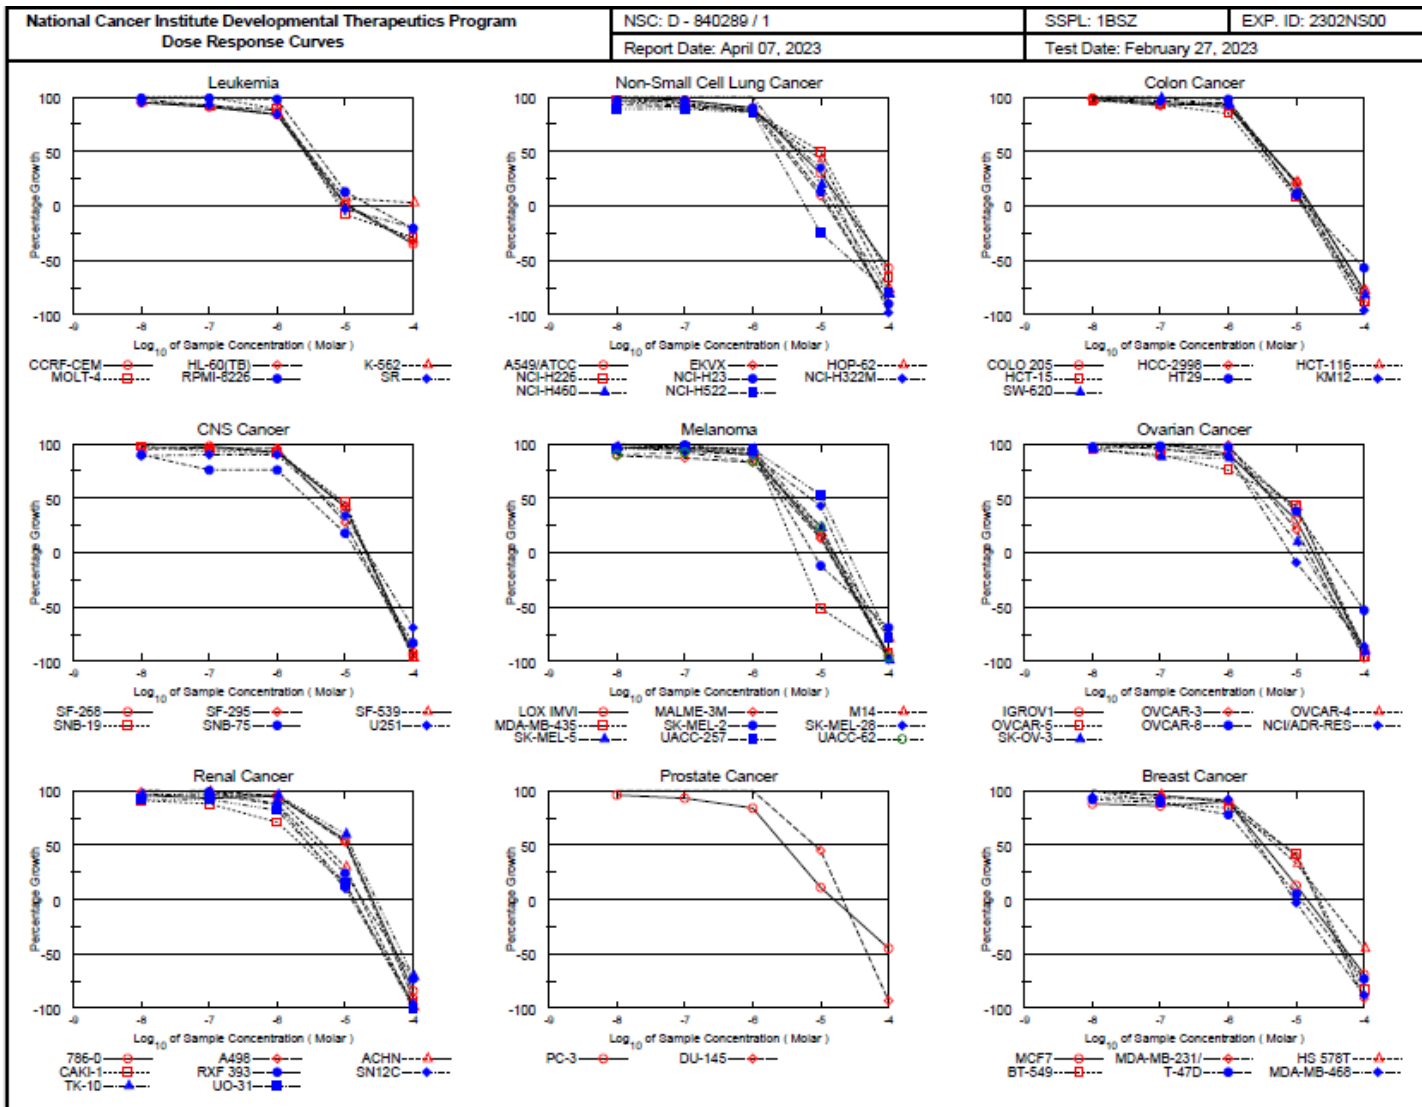

Dose response curve for compound 16.

### 2.3. In vitro EGFR tyrosine kinase inhibitory activity

Table 3S: Epidermal growth factor receptor biological activity of compounds (4, 15 and 16).

| EGFR                                                                                |      |      |     |      |    |    |    |       |      |         |            |
|-------------------------------------------------------------------------------------|------|------|-----|------|----|----|----|-------|------|---------|------------|
| code                                                                                | IC50 | conc | log | %inh | T2 | T1 | ΔT | RFU2  | RFU1 | slope   | K.Activity |
| 4                                                                                   |      | 100  | 2   | 94   | 30 | 0  | 30 | 6.18  | 0    | 3.33333 | 7.416007   |
|    |      | 10   | 1   | 87   | 30 | 0  | 30 | 13.44 | 0    | 3.33333 | 16.12802   |
|                                                                                     |      | 1    | 0   | 71   | 30 | 0  | 30 | 28.57 | 0    | 3.33333 | 34.28403   |
|                                                                                     |      | 0.1  | -1  | 53   | 30 | 0  | 30 | 46.92 | 0    | 3.33333 | 56.30406   |
|                                                                                     |      | 0.01 | -2  | 38   | 30 | 0  | 30 | 62.32 | 0    | 3.33333 | 74.78407   |
|                                                                                     | EC   |      |     |      | 0  | 30 | 0  | 30    | 100  | 0       | 3.33333    |
| code                                                                                | IC50 | conc | log | %inh | T2 | T1 | ΔT | RFU2  | RFU1 | slope   | K.Activity |
| 15                                                                                  |      | 100  | 2   | 94   | 30 | 0  | 30 | 6.22  | 0    | 3.33333 | 7.464007   |
|  |      | 10   | 1   | 85   | 30 | 0  | 30 | 15.28 | 0    | 3.33333 | 18.33602   |
|                                                                                     |      | 1    | 0   | 61   | 30 | 0  | 30 | 39.11 | 0    | 3.33333 | 46.93205   |
|                                                                                     |      | 0.1  | -1  | 45   | 30 | 0  | 30 | 54.82 | 0    | 3.33333 | 65.78407   |
|                                                                                     |      | 0.01 | -2  | 34   | 30 | 0  | 30 | 65.71 | 0    | 3.33333 | 78.85208   |

|                                                                                    |      |      |     |      |    |    |    |       |      |         |            |
|------------------------------------------------------------------------------------|------|------|-----|------|----|----|----|-------|------|---------|------------|
| EC                                                                                 |      |      |     | 0    | 30 | 0  | 30 | 100   | 0    | 3.33333 | 120        |
|                                                                                    |      |      |     |      |    |    |    |       |      |         |            |
| code                                                                               | IC50 | conc | log | %inh | T2 | T1 | ΔT | RFU2  | RFU1 | slope   | K.Activity |
| 16                                                                                 |      | 100  | 2   | 94   | 30 | 0  | 30 | 5.59  | 0    | 3.33333 | 6.708007   |
|   |      | 10   | 1   | 88   | 30 | 0  | 30 | 12.03 | 0    | 3.33333 | 14.43601   |
|                                                                                    |      | 1    | 0   | 72   | 30 | 0  | 30 | 27.66 | 0    | 3.33333 | 33.19203   |
|                                                                                    |      | 0.1  | -1  | 56   | 30 | 0  | 30 | 43.51 | 0    | 3.33333 | 52.21205   |
|                                                                                    |      | 0.01 | -2  | 41   | 30 | 0  | 30 | 59.11 | 0    | 3.33333 | 70.93207   |
| EC                                                                                 |      |      |     | 0    | 30 | 0  | 30 | 100   | 0    | 3.33333 | 120        |
|                                                                                    |      |      |     |      |    |    |    |       |      |         |            |
| code                                                                               | IC50 | conc | log | %inh | T2 | T1 | ΔT | RFU2  | RFU1 | slope   | K.Activity |
| Lapatinib                                                                          |      | 10   | 1   | 95   | 30 | 0  | 30 | 5.07  | 0    | 3.33333 | 6.084006   |
|  |      | 10   | 1   | 88   | 30 | 0  | 30 | 11.61 | 0    | 3.33333 | 13.93201   |
|                                                                                    |      | 10   | 1   | 71   | 30 | 0  | 30 | 28.91 | 0    | 3.33333 | 34.69203   |
|                                                                                    |      | 0.1  | -1  | 57   | 30 | 0  | 30 | 42.55 | 0    | 3.33333 | 51.06005   |
|                                                                                    |      | 0.01 | -2  | 32   | 30 | 0  | 30 | 67.93 | 0    | 3.33333 | 81.51608   |
| EC                                                                                 |      |      |     | 0    | 30 | 0  | 30 | 100   | 0    | 3.33333 | 120        |
|                                                                                    |      |      |     |      |    |    |    |       |      |         |            |

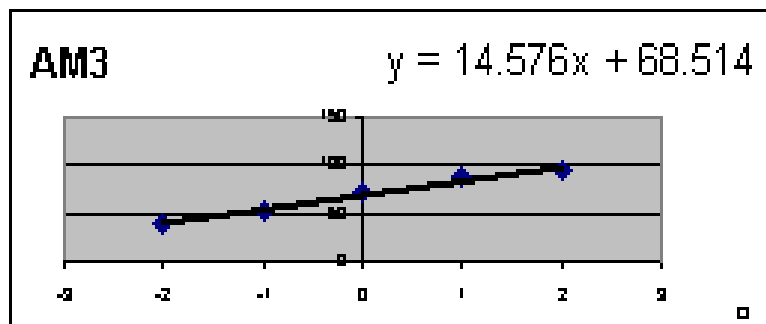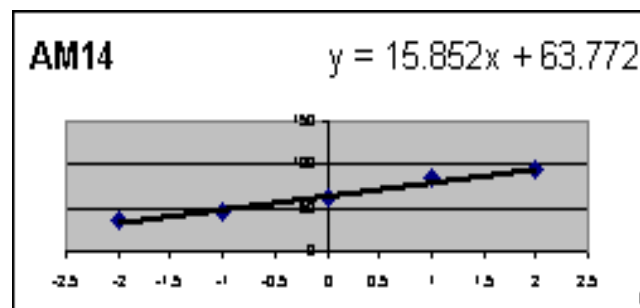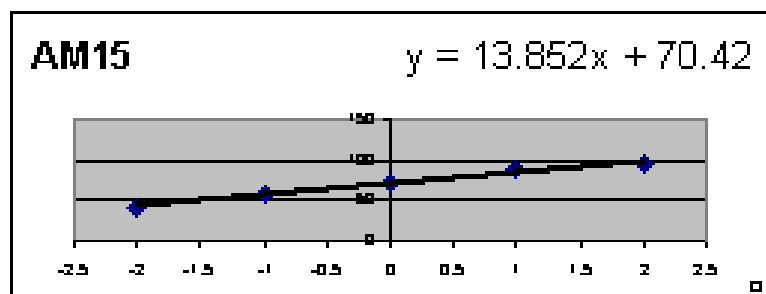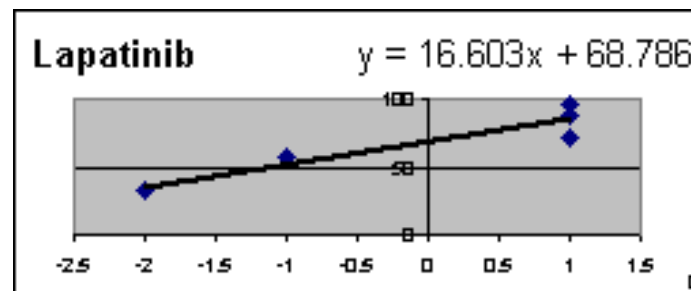

Curves for compounds **4**, **15**, **16**, and **Lapatinib**
